# Supplementary material for: The Ever-Expanding <em>Pseudomonas</em> Genus: Description of 43 New Species and Partition of the <em>Pseudomonas Putida </em>Group
Source: Preprints.org preprint supplement (doi:10.20944/preprints202107.0335.v1), 2021-07-14
Supplement: Supplementary file 1 [file SupMatTables_Final.xlsx]

## Sheet: Table S1
Species	Strain	% Identity with type strain	Former species affiliation	Accession number
(#1) P. anuradhapurensis sp. nov.	RD8MR3	-	Pseudomonas sp.	MT621460
	RD8SR1	99.85	Pseudomonas sp.	MT621456
	RD8PR2	99.85	Pseudomonas sp.	MT621457
	RD8PR3	99.85	Pseudomonas sp.	MT621458
	FP24	99.85	P. putida	DQ201390
	SK	99.69	Pseudomonas sp.	CP051857
	FP20	99.38	P. putida	DQ201386
	FP25	98.76	P. putida	DQ201391
	RD5PR2	98.91	Pseudomonas sp.	MT621459
(#2) P. oryzicola sp. nov.	RD9SR1	-	Pseudomonas sp.	MT621461
	RD6SR1	98.3	Pseudomonas sp.	MT621462
(#3) P. kurunegalensis sp. nov.	RW1P2	-	Pseudomonas sp.	MT621449
	FDAARGOS_171	100	P. monteilli	CP014062
	STW0522-72	100	P. monteilli	AP022473
	JDS38PS037	99.54	Pseudomonas sp.	LR135114
	170620603RE	99.23	P. monteilli	CP043396
	170918607	99.23	P. monteilli	CP043395
(#4) P. kermanshahensis sp. nov.	SWRI100	-	Pseudomonas sp.	MT621423
	SWRI67	100	Pseudomonas sp.	MT621422
	SWRI50	100	Pseudomonas sp.	MT621424
	Irchel s3c7	99.84	Pseudomonas sp.	LT898042
	E46	99.69	P. putida	CP024086
	PAGU2196	99.69	Pseudomonas sp.	LC596904
	E41	99.53	P. putida	CP024085
(#5) P. wayambapalatensis sp. nov.	RW3S1	-	Pseudomonas sp.	MT621434
	RW3S2	100	Pseudomonas sp.	MT621435
	RW10S2	100	Pseudomonas sp.	MT621436
(#6) P. xantholysinigenes sp. nov.	RW9S1A	-	Pseudomonas sp.	MT621442
	PF41	98.76	Pseudomonas sp.	MG022047
(#7) P. peradeniyensis sp. nov.	BW13M1	-	Pseudomonas sp.	MT621446
	BW16S3	99.38	Pseudomonas sp.	MT621444
	JDS10PS003	99.23	Pseudomonas sp.	LR135011
	BW16S1	98.61	Pseudomonas sp.	MT621443
	BW16M2	98.61	Pseudomonas sp.	MT621445
(#8) P. vlassakiae sp. nov.	RW4S2	-	Pseudomonas sp.	MT621428
	RW4P2	99.69	Pseudomonas sp.	MT621429
	WCU_60	99.69	Pseudomonas sp.	MT506154
	WCU_64	99.69	Pseudomonas sp.	MT506153
	NNC7	99.54	Pseudomonas sp.	MT506155
(#9) P. promysalinigenes sp. nov.	RW10S1	-	Pseudomonas sp.	MT621430
	RW10P3b	100	Pseudomonas sp.	MT621431
	RW9S2	99.53	Pseudomonas sp.	MT621432
	RW7S1	99.38	Pseudomonas sp.	MT621433
	JDS59PS022	98.91	Pseudomonas sp.	LR135126
(#10) P. urmiensis sp. nov.	SWRI10	-	Pseudomonas sp.	MT621419
	SWRI9	99.85	Pseudomonas sp.	MT621420
	SWRI34	98.92	Pseudomonas sp.	MT621421
(#11) P. shirazensis sp. nov.	SWRI56	-	Pseudomonas sp.	MT621418
	SWRI53	99.69	Pseudomonas sp.	MT621415
	SWRI147	99.54	Pseudomonas sp.	MT621416
	SWRI41	99.38	Pseudomonas sp.	MT621417
	02C 26	98.61	Pseudomonas sp.	CP025262
	JDS02PS014	98.45	Pseudomonas sp.	LR134987
(#12) P. farsensis sp. nov.	SWRI107	-	Pseudomonas sp.	MT621411
	SWRI51	100	Pseudomonas sp.	MT621412
	SWRI97	100	Pseudomonas sp.	MT621409
	SWRI98	100	Pseudomonas sp.	MT621410
	JDS28PS090	99.38	Pseudomonas sp.	LR135069
	SWRI101	99.38	Pseudomonas sp.	MT621414
	JDS28PS035	98.91	Pseudomonas sp.	LR135050
	SWRI40	98.76	Pseudomonas sp.	MT621413
(#13) P. vanderleydeniana sp. nov.	RW8P3	-	Pseudomonas sp.	MT621472
(#14) P. bananamidigenes sp. nov.	BW11P2	-	Pseudomonas sp.	MT621496
(#15) P. iranensis sp. nov.	SWRI54	-	Pseudomonas sp.	MT621504
	VF3	100	Pseudomonas sp.	LT718511
	SWRI19	99.84	Pseudomonas sp.	MT621505
	SWRI28	98.6	Pseudomonas sp.	MT621506
(#16) P. khorasanensis sp. nov.	SWRI153	-	Pseudomonas sp.	MT621508
	SWRI185	100	Pseudomonas sp.	MT621509
	SWRI162	99.69	Pseudomonas sp.	MT621510
(#17) P. hamedanensis sp. nov.	SWRI65	-	Pseudomonas sp.	MT621514
	SWRI200	99.38	Pseudomonas sp.	MT621515
	SWRI113	99.07	Pseudomonas sp.	MT621513
	SWRI99	98.76	Pseudomonas sp.	MT621511
	SWRI111	98.76	Pseudomonas sp.	MT621512
	SWRI33	98.29	Pseudomonas sp.	MT621517
	SWRI81	98.29	Pseudomonas sp.	MT621516
(#18) P. zeae sp. nov.	OE 48.2	-	Pseudomonas sp.	MT621498
	OE 49.2	100	Pseudomonas sp.	MT621499
	Irchel s3f4	99.84	Pseudomonas sp.	LT898094
	Irchel s3d19	99.84	Pseudomonas sp.	LT898052
	Irchel s3f15	99.69	Pseudomonas sp.	LT898086
	Irchel s3a12	99.69	Pseudomonas sp.	LT897991
	PS7	99.69	P. fluorescens	LN849867
	R-42071	99.69	Pseudomonas sp.	HE603597
	R-42020	99.69	Pseudomonas sp.	HE603595
	Irchel s3d20	99.53	Pseudomonas sp.	LT898054
	P115	99.53	Pseudomonas sp.	LR797658
	PGSB 7947	99.38	Pseudomonas sp.	MT621500
(#19) P. tensinigenes sp. nov.	ZA 5.3	-	Pseudomonas sp.	MT621501
	HRI 95	100	P. marginalis	AB039544
	Irchel s3f5	99.38	Pseudomonas sp.	LT898095
	Irchel s3f3	99.38	Pseudomonas sp.	LT898093
(#20) P. monsensis sp. nov.	PGSB 8459	-	Pseudomonas sp.	MT621495
	JDS28PS053	99.84	Pseudomonas sp.	LR135053
	PF73	99.84	P. koreensis	MG022038
	PF81	99.84	P. koreensis	KY950283
	JDS38PS032	99.53	Pseudomonas sp.	LR135112
	PF35	99.53	P. koreensis	MG022041
	PF99	99.53	P. koreensis	MG022040
	PF97	99.53	P. koreensis	MG022039
	Irchel s2d16	99.53	Pseudomonas sp.	LS398873
	SC3	99.38	P. fluorescens	MN648414
(#21) P. zanjanensis sp. nov.	SWRI12	-	Pseudomonas sp.	MT621484
	SWRI15	100	Pseudomonas sp.	MT621485
	SWRI13	99.69	Pseudomonas sp.	MT621486
	SWRI110	99.69	Pseudomonas sp.	MT621487
	CFBP 4629	99.69	Pseudomonas sp.	HF545855
	SWRI 179	99.38	Pseudomonas sp.	MT621488
	S58	99.38	Pseudomonas sp.	HG325843
	BGCR3-9(1)	99.22	P. brassicacearum	KT358215
	R1-4	98.91	P. thivervalensis	KT358214
(#22) P. zarinae sp. nov.	SWRI108	-	Pseudomonas sp.	MT621493
	JDS67PS025	100	Pseudomonas sp.	LR135152
	SWRI122	99.69	Pseudomonas sp.	MT621494
	Irchel s3h2	98.91	Pseudomonas sp.	LT898128
	FR1	98.29	P. fluorescens	CP003150
	F113	98.29	P. fluorescens	CP025738
(#23) P. tehranensis sp. nov.	SWRI196	-	Pseudomonas sp.	MT621473
	SWRI11	100	Pseudomonas sp.	MT621474
	SWRI8	99.84	Pseudomonas sp.	MT621476
	SWRI121	99.38	Pseudomonas sp.	MT621475
(#24) P. marvdashtae sp. nov.	SWRI102	-	Pseudomonas sp.	MT621490
	SWRI92	100	Pseudomonas sp.	MT621489
	SWRI16	99.69	Pseudomonas sp.	MT621491
(#25) P. shahriarae sp. nov.	SWRI52	-	Pseudomonas sp.	MT621521
	PF90	99.85	P. fluorescens	MG022009
	PF89	99.54	P. fluorescens	MG022024
	PF49	99.54	P. fluorescens	MG022020
	PF43	99.54	P. fluorescens	MG022019
	PF85	99.54	P. fluorescens	MG022012
	Irchel 3A14	99.54	Pseudomonas sp.	LT897845
	NCPPB 1795	99.54	P. fluorescens	LN849871
	NCPPB 1796	99.54	P. fluorescens	LN849872
	PF08	99.08	P. fluorescens	CP032618
(#26) P. azadiae sp. nov.	SWRI103	-	Pseudomonas sp.	MT621536
(#27) P. tritici sp. nov.	SWRI145	-	Pseudomonas sp.	MT621537
	SWRI144	100	Pseudomonas sp.	MT621539
	SWRI195	100	Pseudomonas sp.	MT621538
(#28) P. salmasensis sp. nov.	SWRI126	-	Pseudomonas sp.	MT621526
	FBF41	100	Pseudomonas sp.	HG805535
	FBF23	100	Pseudomonas sp.	HG805520
(#32) P. triticicola sp. nov.	SWRI88	-	Pseudomonas sp.	JAHSTX010000002
(#33) P. siliginis sp. nov.	SWRI31	-	Pseudomonas sp.	JAHSTW010000002
	B10	99.84	Pseudomonas sp.	LT707063
	SE18	99.38	Pseudomonas sp.	LT600940
(#34) P. farris sp. nov.	SWRI79	-	Pseudomonas sp.	JAHSTV010000008
	ATCC 12983	99.22	P. fluorescens	AB039529
	Irchel 3A11	99.07	Pseudomonas sp.	LT897842
	PS1	99.07	P. fluorescens	LN849876
(#35) P. azerbaijanoccidens sp. nov.	SWRI74	-	Pseudomonas sp.	JAHSTU010000004
(#36) P. alvandae sp. nov.	SWRI17	-	Pseudomonas sp.	QXI53030
	Pf29Arp	100	P. fluorescens	ANOR01000027
(#37) P. asgharzadehiana sp. nov.	SWRI132	-	Pseudomonas sp.	QXH67026
	Irchel s3e20	99.85	Pseudomonas sp.	LT898074
	608	99.85	Pseudomonas sp.	HF932154
(#38) P. azerbaijanoriens sp. nov.	SWRI123	-	Pseudomonas sp.	QXH61574
	Irchel s3h18	100	Pseudomonas sp.	LT898127
	Irchel s3h11	100	Pseudomonas sp.	LT898120
	Irchel s3e9	100	Pseudomonas sp.	LT898080
	UW4	100	Pseudomonas sp.	CP003880
	KGS-2	99.84	P. stutzeri	CP018050
	KGS-8	99.84	P. stutzeri	CP018046
	Irchel s3e10	99.84	Pseudomonas sp.	LT898063
	Irchel s3e13	99.84	Pseudomonas sp.	LT898066
(#39) P. khavaziana sp. nov.	SWRI124	-	Pseudomonas sp.	JAHSTT010000002
(#40) P. botevensis sp. nov.	COW3	-	Pseudomonas sp.	JAHTKI010000001
(#41) P. ekonensis sp. nov.	COR58	-	Pseudomonas sp.	JAHSTS010000003
	COR24	100	Pseudomonas sp.	MT506166
(#42) P. maumuensis sp. nov.	COW77	-	Pseudomonas sp.	QXH57030
(#43) P. fakonensis sp. nov.	COW40	-	Pseudomonas sp.	QXH51985
(#44) P. xanthosomae sp. nov.	COR54	-	Pseudomonas sp.	QXH47354
(#46) P. sessilinigenes sp. nov.	CMR12a	-	Pseudomonas sp.	QXH40275
	BIOMIG1BAC	99.69	Pseudomonas sp.	CP049045
(#47) P. muyukensis sp. nov.	COW39	-	Pseudomonas sp.	QXH35430

## Sheet: Table S2
Species	Isolate	ANI (%)*	Former species affiliation	Accession number
(#1) P. anuradhapurensis sp. nov.	RD8MR3	-	Pseudomonas sp.	CP077097
	SK	97.62	Pseudomonas sp.	CP051857
(#2) P. oryzicola sp. nov.	RD9SR1	-	Pseudomonas sp.	JABWRZ000000000
(#3) P. kurunegalensis sp. nov.	RW1P2	-	Pseudomonas sp.	JABWSB000000000
	FDAARGOS 171	99.77	P. monteilli	CP014062
	STW0522-72	99.64	P. monteilli	AP022473
	170620603RE	99.45	P. monteilli	CP043396
	170918607	99.44	P. monteilli	CP043395
(#4) P. kermanshahensis sp. nov.	SWRI100	-	Pseudomonas sp.	JABWRY000000000
	SWRI67	99.98	Pseudomonas sp.	JABWRX000000000
	SWRI50	99.39	Pseudomonas sp.	JABWRW000000000
	E46	97.51	P. putida	CP024086
	E41	97.44	P. putida	CP024085
(#5) P. wayambapalatensis sp. nov.	RW3S1	-	Pseudomonas sp.	CP077096
	RW3S2	99.21	Pseudomonas sp.	JABWRM000000000
	RW10S2	99.26	Pseudomonas sp.	JABWRO000000000
(#6) P. xantholysinigenes sp. nov.	RW9S1A	-	Pseudomonas sp.	CP077095
(#7) P. peradeniyensis sp. nov.	BW13M1	-	Pseudomonas sp.	JABWRJ000000000
	BW16M2	96.59	Pseudomonas sp.	JABWRI000000000
(#8) P. vlassakiae sp. nov.	RW4S2	-	Pseudomonas sp.	JABWRP000000000
(#9) P. promysalinigenes sp. nov.	RW10S1	-	Pseudomonas sp.	CP077094
(#10) P. urmiensis sp. nov.	SWRI10	-	Pseudomonas sp.	JABWRE000000000
(#11) P. shirazensis sp. nov.	SWRI56	-	Pseudomonas sp.	JABWRD000000000
	02C 26	97.25	Pseudomonas sp.	CP025262
(#12) P. farsensis sp. nov.	SWRI107	-	Pseudomonas sp.	JABWRF000000000
	SWRI51	98.65	Pseudomonas sp.	JABWRG000000000
(#13) P. vanderleydeniana sp. nov.	RW8P3	-	Pseudomonas sp.	CP077093
(#14) P. bananamidigenes sp. nov.	BW11P2	-	Pseudomonas sp.	LRUN00000000
(#15) P. iranensis sp. nov.	SWRI54	-	Pseudomonas sp.	CP077092
(#16) P. khorasanensis sp. nov.	SWRI153	-	Pseudomonas sp.	JABWQP000000000
(#17) P. hamedanensis sp. nov.	SWRI65	-	Pseudomonas sp.	CP077091
	SWRI81	97.55	Pseudomonas sp.	JABWQS000000000
	SWRI99	97.19	Pseudomonas sp.	JABWQR000000000
	SWRI111	97.37	Pseudomonas sp.	JABWQQ000000000
(#18) P. zeae sp. nov.	OE 48.2	-	Pseudomonas sp.	CP077090
(#19) P. tensinigenes sp. nov.	ZA 5.3	-	Pseudomonas sp.	CP077089
(#20) P. monsensis sp. nov.	PGSB 8459	-	Pseudomonas sp.	CP077087
(#21) P. zanjanensis sp. nov.	SWRI12	-	Pseudomonas sp.	JABWRB000000000
	SWRI179	99.00	Pseudomonas sp.	JABWRA000000000
(#22) P. zarinae sp. nov.	SWRI108	-	Pseudomonas sp.	CP077086
	F113	96.73	P. fluorescens	CP003150
	FR1	96.75	P. fluorescens	CP025738
(#23) P. tehranensis sp. nov.	SWRI196	-	Pseudomonas sp.	JABWQV000000000
(#24) P. marvdashtae sp. nov.	SWRI102	-	Pseudomonas sp.	JABWQX000000000
	SWRI92	99.19	Pseudomonas sp.	JABWQY000000000
(#25) P. shahriarae sp. nov.	SWRI52		Pseudomonas sp.	CP077085
	PF08	99.29	P. fluorescens	CP032618
(#26) P. azadiae sp. nov.	SWRI103	-	Pseudomonas sp.	JAHSTY000000000
(#27) P. tritici sp. nov.	SWRI145	-	Pseudomonas sp.	CP077084
	SWRI144	99.76	Pseudomonas sp.	JABWQG000000000
(#28) P. salmasensis sp. nov.	SWRI126	-	Pseudomonas sp.	CP077083
(#29) P. carnis	SWRI22	98.84	Pseudomonas sp.	JABWQK000000000
(#30) P. edaphica	OE 28.3	98.68	Pseudomonas sp.	CP077082
(#31) P. atacamensis	SWRI76	98.19	Pseudomonas sp.	CP077081
(#32) P. triticicola sp. nov.	SWRI88	-	Pseudomonas sp.	JAHSTX000000000
(#33) P. siliginis sp. nov.	SWRI31	-	Pseudomonas sp.	JAHSTW000000000
	B10	97.32	Pseudomonas sp.	LT707063
(#34) P. farris sp. nov.	SWRI79	-	Pseudomonas sp.	JAHSTV000000000
(#35) P. azerbaijanoccidens sp. nov.	SWRI74	-	Pseudomonas sp.	JAHSTU000000000
(#36) P. alvandae sp. nov.	SWRI17	-	Pseudomonas sp.	CP077080
	Pf29Arp	98.52	P. fluorescens	ANOR00000000
(#37) P. asgharzadehiana sp. nov.	SWRI132	-	Pseudomonas sp.	CP077079
(#38) P. azerbaijanoriens sp. nov.	SWRI123	-	Pseudomonas sp.	CP077078
	UW4	97.58	Pseudomonas sp.	CP003880
	KGS-2	97.30	P. stutzeri	CP018050
	KGS-8	97.28	P. stutzeri	CP018046
(#39) P. khavaziana sp. nov.	SWRI124	-	Pseudomonas sp.	JAHSTT000000000
(#40) P. botevensis sp. nov.	COW3	-	Pseudomonas sp.	JAHTKI000000000
(#41) P. ekonensis sp. nov.	COR58	-	Pseudomonas sp.	JAHSTS000000000
(#42) P. maumuensis sp. nov.	COW77	-	Pseudomonas sp.	CP077077
(#43) P. fakonensis sp. nov.	COW40	-	Pseudomonas sp.	CP077076
(#44) P. xanthosomae sp. nov.	COR54	-	Pseudomonas sp.	CP077075
(#45) P. aestus	CMR5c	99.22	Pseudomonas sp.	LHUY00000000
(#46) P. sessilinigenes sp. nov.	CMR12a	-	Pseudomonas sp.	CP077074
	BIOMIG1BAC	98.77	Pseudomonas sp.	CP049045
(#47) P. muyukensis sp. nov.	COW39	-	Pseudomonas sp.	CP077073
* ANIb values are the averages of the bidirectional comparisons

## Sheet: Table S3
Strain	RD8MR3	RD9SR1	RW1P2	SWRI100	RW3S1	RW9S1A	BW13M1	RW4S2	RW10S1	SWRI10	SWRI56	SWRI107	RW8P3	BW11P2	SWRI54	SWRI153	SWRI65	OE 48.2	ZA 5.3	PGSB 8459	SWRI12	SWRI108	SWRI196	SWRI102	SWRI52	SWRI103	SWRI145	SWRI126	SWRI22	OE 28.3	SWRI76	SWRI88	SWRI31	SWRI79	SWRI74	SWRI17	SWRI132	SWRI123	SWRI124	COW3	COR58	COW77	COW40	COR54	CMR5c	CMR12a	COW39
Culture Collection Numbers	LMG 32021	LMG 32022	LMG 32023	LMG 32024	LMG 32025	LMG 32026	LMG 32027	LMG 32028	LMG 32029	LMG 32030	LMG 32031	LMG 32032	LMG 32033	LMG 32034	LMG 32035	LMG 32036	LMG 32037	LMG 32038	LMG 32039	LMG 32040	LMG 32041	LMG 32042	LMG 32043	LMG 32044	LMG 32045	LMG 32046	LMG 32047	LMG 32048	LMG 32049	LMG 32050	LMG 32051	LMG 32052	LMG 32053	LMG 32054	LMG 32055	LMG 32056	LMG 32057	LMG 32058	LMG 32059	LMG 32176	LMG 32175	LMG 32179	LMG 32178	LMG 32174	LMG 32172	LMG 32173	LMG 32177
	CFBP 8837	CFBP 8838	CFBP 8839	CFBP 8840	CFBP 8841	CFBP 8842	CFBP 8887	CFBP 8843	CFBP 8844	CFBP 8845	CFBP 8846	CFBP 8847	CFBP 8848	CFBP 8849	CFBP 8850	CFBP 8851	CFBP 8852	CFBP 8853	CFBP 8882	CFBP 8854	CFBP 8855	CFBP 8856	CFBP 8857	CFBP 8858	CFBP 8859	CFBP 8860	CFBP 8883	CFBP 8861	CFBP 8862	CFBP 8863	CFBP 8864	CFBP 8865	CFBP 8866	CFBP 8867	CFBP 8868	CFBP 8869	CFBP 8870	CFBP 8871	CFBP 8872	CFBP 8873	CFBP 8874	CFBP 8888	CFBP 8875	CFBP 8876	CFBP 8889	CFBP 8877	CFBP 8890
Growth in presence of
1% NaCl	+	+	+	+	+	+	+	+	+	+	+	+	+	+	+	+	+	+	+	+	w	+	+	+	+	+	+	+	+	+	+	+	+	w	+	+	+	+	+	+	+	+	+	+	+	+	+
4% NaCl	w	w	+	w	w	w	w	w	w	w	+	w	w	w	w	w	+	w	-	w	w	w	w	-	w	-	-	w	w	-	+	w	-	-	-	+	-	-	+	w	-	-	+	+	w	w	+
8% NaCl	-	-	-	-	-	-	-	-	w	-	-	-	w	-	-	-	-	-	-	-	-	-	-	-	-	-	-	-	-	-	-	-	-	-	-	-	-	-	-	-	-	-	-	-	-	-	-
pH 5	+	+	w	+	+	+	+	+	+	+	w	w	+	w	w	w	-	w	+	+	-	+	-	-	-	w	-	+	+	w	+	w	+	-	-	+	w	w	+	w	+	+	+	+	+	+	+
pH 6	+	+	+	+	+	+	+	+	+	+	+	+	+	+	+	+	+	+	+	+	+	+	+	+	+	+	+	+	+	+	+	+	+	+	+	+	+	+	+	+	+	+	+	+	+	+	+
1% sodium lactate	+	+	+	+	+	+	+	+	+	+	+	+	+	+	+	+	+	+	+	+	+	+	+	+	+	+	+	+	+	+	+	+	+	+	+	+	w	+	+	+	+	+	+	+	+	+	+
troleandomycin	+	+	+	+	+	+	+	+	+	+	+	+	+	+	+	+	+	+	+	+	+	+	+	+	+	+	+	+	+	+	+	+	+	w	+	+	w	+	+	+	+	+	+	+	+	+	+
lincomycin	+	+	+	+	+	+	+	+	+	+	+	+	+	+	+	+	+	+	+	+	+	+	+	+	+	+	+	+	+	+	+	+	+	+	+	+	+	+	+	+	+	+	+	+	+	+	+
vancomycin	+	+	+	+	+	+	+	+	+	+	+	+	+	+	+	+	+	+	+	+	+	+	+	+	+	+	+	+	+	+	+	+	+	+	+	+	+	+	+	+	+	+	+	+	+	+	+
nalidixic acid	+	+	+	+	+	+	+	+	+	w	+	w	+	+	w	w	w	+	-	w	w	w	w	w	w	w	-	-	w	+	w	w	w	w	w	-	w	-	w	+	+	+	+	+	+	+	+
aztreonam	+	w	w	+	w	w	w	w	+	w	w	+	+	w	w	w	+	+	+	w	w	w	+	w	w	+	-	w	w	+	+	w	+	w	w	+	-	w	w	+	+	-	+	+	+	+	+
fusidic acid	+	+	+	+	+	+	+	+	+	+	+	+	+	+	+	+	+	w	+	+	+	+	+	w	+	+	-	+	+	+	+	+	w	+	w	+	w	-	+	+	+	+	+	+	+	+	+
rifamycin SV	+	+	+	+	+	+	w	+	+	+	+	+	+	+	+	+	+	+	+	+	+	+	+	+	+	+	+	+	+	+	+	+	+	+	+	+	+	+	+	+	+	+	+	+	+	+	+
guanidine HCl	w	w	+	+	+	w	+	+	w	w	+	w	+	w	+	w	+	w	+	w	w	w	+	w	+	+	+	w	w	+	+	w	w	w	+	+	w	+	+	+	+	+	+	+	+	-	+
tetrazolium violet	+	+	+	+	+	+	+	+	+	+	+	+	+	+	+	+	+	+	+	+	+	+	+	+	+	+	+	+	+	+	+	+	+	+	+	+	+	+	+	+	+	+	+	+	+	+	+
lithium chloride	+	w	+	w	+	+	+	+	w	+	+	+	w	w	w	w	-	w	+	+	w	-	+	w	+	-	w	w	w	w	+	w	w	-	-	w	-	w	w	+	+	+	+	+	+	+	+
sodium butyrate	-	-	w	-	w	-	-	-	-	w	-	-	-	-	w	-	-	-	-	-	-	-	-	-	-	-	-	-	-	-	-	-	-	-	-	-	-	-	-	-	-	-	-	-	w	-	+
D-serine	w	+	+	w	+	w	+	w	w	+	+	w	-	-	w	w	+	w	+	+	-	-	+	-	+	+	-	+	+	+	+	w	-	-	-	-	-	w	+	-	-	+	+	+	+	+	+
minocycline	+	w	+	+	-	+	+	w	+	-	w	-	+	-	-	-	-	-	w	-	-	-	-	-	-	-	-	-	-	+	w	w	-	-	-	-	-	-	-	-	-	-	-	-	+	+	+
niaproof 4	+	+	+	+	+	+	+	+	+	+	+	+	+	+	+	+	+	+	+	+	-	+	+	+	+	+	-	+	+	+	+	+	+	+	+	+	+	+	+	+	+	+	+	+	+	+	+
tetrazolium blue	+	+	+	+	+	+	+	+	+	+	+	+	+	+	+	+	+	+	+	+	+	+	+	+	+	+	+	+	+	+	+	+	+	+	+	+	+	+	+	-	+	+	+	+	+	+	+
potassium tellurite	+	+	+	+	+	+	+	+	+	+	+	+	w	+	+	+	+	+	+	+	+	+	+	+	w	+	+	+	+	+	+	w	+	+	-	+	-	w	+	-	+	+	+	+	+	+	+
sodium bromate	-	-	-	w	w	w	w	-	w	-	-	-	-	w	w	-	-	-	-	-	-	-	-	-	-	-	-	-	-	-	-	-	-	-	-	-	-	-	-	-	-	-	-	-	-	-	+
Oxidation of
D-raffinose	-	-	-	-	-	-	-	-	-	-	-	-	-	-	-	-	-	-	-	-	-	-	-	-	-	-	-	-	-	-	-	-	-	-	-	-	-	-	-	-	-	-	-	-	-	-	-
α-D-glucose	w	+	+	+	+	+	+	+	+	+	+	w	+	+	+	+	+	+	+	+	+	+	+	+	+	+	+	+	+	+	+	+	+	+	+	+	+	+	+	+	+	+	+	+	+	+	+
D-sorbitol	-	-	-	-	-	-	+	-	-	-	-	-	-	-	-	-	w	-	-	-	+	w	w	w	-	w	-	w	-	w	-	-	-	-	-	+	-	-	w	-	-	-	-	-	-	-	-
gelatin	-	-	-	-	-	-	w	-	-	-	-	-	-	-	-	-	-	-	-	-	-	-	-	-	-	-	-	-	-	-	-	-	-	-	-	-	-	-	-	-	-	-	-	-	-	-	-
pectin	-	w	-	-	-	-	w	-	-	-	-	-	-	-	-	-	-	-	-	w	+	w	w	-	-	-	-	-	-	w	-	-	-	w	-	w	-	-	-	-	-	-	-	-	-	-	-
p-hydroxyphenylacetic acid	-	-	+	+	-	+	w	-	+	w	w	-	w	-	-	-	-	-	-	-	w	+	+	-	+	-	-	+	+	-	-	-	-	-	w	-	+	-	+	-	-	w	-	-	w	+	-
tween 40	w	w	-	w	w	-	+	w	w	-	-	-	-	w	w	w	+	w	+	+	+	-	w	-	w	+	-	w	+	w	+	+	+	-	-	-	-	-	w	+	+	w	-	-	+	+	w
dextrin	-	-	-	-	-	-	-	-	-	-	-	-	-	-	-	-	-	-	-	-	-	-	-	-	-	-	w	-	-	-	-	-	-	w	w	-	-	-	-	w	-	w	-	-	w	w	-
α-D-lactose	-	-	-	-	-	-	-	-	-	-	-	-	-	-	-	-	-	-	-	-	-	-	-	-	-	-	-	-	-	-	-	-	-	-	-	-	-	-	-	-	-	-	-	-	-	-	-
D-mannose	w	w	-	w	+	+	+	w	w	+	w	w	+	+	+	+	+	+	+	+	+	+	+	+	+	+	+	+	+	+	+	+	+	+	+	+	+	+	+	+	+	+	+	w	w	w	w
D-mannitol	-	-	-	-	w	w	+	-	-	-	-	-	w	w	-	w	w	-	w	+	w	w	+	w	w	+	-	+	+	w	+	+	w	-	-	+	-	-	+	+	+	+	w	w	-	-	-
glycyl-L-proline	-	-	-	-	-	-	-	-	-	-	-	-	-	-	-	-	-	-	-	-	w	-	-	-	-	-	-	w	+	-	-	-	-	-	-	-	-	-	w	w	w	-	-	-	+	+	-
D-galacturonic acid	+	-	+	+	+	-	w	w	+	-	w	-	-	-	w	-	w	w	w	-	+	+	+	+	-	+	+	+	+	+	w	w	-	+	+	+	+	+	+	w	w	w	+	+	w	w	-
methylpyruvate	-	w	-	w	w	w	+	-	-	w	w	-	w	-	-	-	-	-	-	w	w	w	w	w	-	w	-	-	w	-	-	-	w	-	-	w	-	+	w	+	-	w	w	w	-	-	w
ɣ-aminobutyric acid	+	+	+	+	+	+	+	+	+	w	+	+	+	w	+	w	w	+	+	+	+	+	+	+	+	+	w	+	+	+	+	+	+	-	+	+	w	+	+	+	+	+	+	+	+	+	+
D-maltose	-	-	-	-	-	-	-	-	-	-	-	-	-	-	-	-	-	-	-	-	-	-	-	-	-	-	-	-	-	-	-	-	-	-	-	-	-	-	-	-	-	-	-	-	-	-	-
D-melibiose	-	-	-	-	-	-	w	-	-	-	-	-	-	w	-	-	w	w	+	w	-	-	-	-	-	w	+	w	w	w	w	w	w	+	w	-	w	w	w	w	w	w	-	-	w	w	-
D-fructose	+	w	+	w	w	w	+	w	-	-	w	w	+	w	+	w	+	w	+	+	+	+	w	+	+	+	+	+	+	+	+	+	+	+	+	+	+	+	+	+	+	+	w	w	w	w	w
D-arabitol	-	-	-	-	-	-	-	-	-	-	-	-	w	w	-	w	w	-	w	+	w	w	w	-	w	+	w	+	+	+	+	w	w	-	w	-	-	-	+	+	w	-	-	-	-	-	-
L-alanine	+	+	+	+	+	+	+	+	+	+	+	+	+	w	+	+	+	w	+	+	+	+	+	+	+	+	w	+	+	+	+	+	+	-	w	+	w	+	+	+	+	+	+	+	+	+	+
L-galactonic acid lactone	w	w	w	w	w	w	w	w	w	w	w	w	w	w	w	w	w	+	+	w	+	w	w	w	w	w	+	w	+	w	w	w	w	+	+	+	+	+	w	w	w	w	+	+	+	w	-
D-lactic acid methylester	-	-	-	-	-	-	+	-	-	-	-	-	-	-	-	-	-	-	-	-	-	-	-	-	-	-	-	-	-	-	-	-	-	-	-	-	-	-	-	-	-	-	-	-	-	-	-
α-hydroxybutyric acid	-	-	-	-	-	-	-	-	-	-	-	-	-	-	-	-	-	-	-	-	-	w	w	-	-	-	-	w	w	-	-	-	-	-	-	-	-	-	w	-	w	-	-	-	-	w	-
D-trehalose	-	-	-	-	w	w	w	-	-	-	-	-	+	-	-	-	-	-	-	+	+	+	+	-	+	+	w	w	+	w	w	+	+	-	-	w	-	-	+	-	-	-	-	-	w	+	-
ß-methyl-D-glucoside	-	-	-	-	-	-	-	-	-	-	-	-	-	-	-	-	-	-	-	-	-	-	-	-	-	-	-	-	-	-	-	-	-	-	-	-	-	-	-	-	-	-	-	-	-	-	-
D-galactose	w	w	-	-	w	-	w	w	w	w	w	w	+	+	+	+	+	+	+	+	+	+	+	+	w	+	+	+	+	+	+	+	+	+	+	+	+	+	+	+	+	w	-	-	-	-	-
myo-inositol	-	-	-	-	w	-	-	-	-	-	-	-	-	-	-	-	-	-	-	-	+	+	+	+	+	+	-	+	+	+	-	-	-	-	-	+	w	-	+	+	-	-	-	-	-	+	-
L-arginine	+	+	+	+	+	+	+	+	w	+	w	+	+	+	-	+	-	+	+	+	w	w	w	w	+	w	-	+	+	+	+	+	+	-	+	+	+	+	+	+	+	+	+	+	+	+	+
D-gluconic acid	+	+	+	+	+	w	+	+	+	+	+	+	+	+	+	+	+	w	w	w	+	+	+	+	+	+	w	+	+	+	+	+	+	-	w	+	w	+	+	+	+	+	+	+	+	+	+
L-lactic acid	+	+	+	+	+	+	+	+	+	+	+	+	+	w	+	w	+	w	w	+	+	+	+	+	+	+	+	+	+	+	+	+	+	-	w	+	w	+	+	+	+	+	+	+	+	+	+
ß-hydroxy-D,L-butyric acid	w	w	w	+	w	w	+	w	-	w	-	-	w	w	-	-	-	-	w	+	w	w	+	-	w	w	-	+	+	w	+	+	w	-	-	+	-	w	+	+	+	+	w	w	+	+	w
D-cellobiose	-	-	-	-	-	-	-	-	-	-	-	-	-	-	-	-	-	-	-	-	-	-	-	-	-	-	-	-	-	-	-	-	-	-	-	-	-	-	-	-	-	-	-	-	-	-	-
D-salicin	-	-	-	-	-	-	w	-	-	-	-	-	-	-	-	-	-	-	-	-	-	-	-	-	-	-	-	-	-	-	-	-	-	-	-	-	-	-	-	-	-	-	-	-	-	-	-
3-methylglucose	-	-	-	-	-	-	w	-	-	-	-	-	-	w	-	-	-	w	+	w	-	w	w	-	-	w	w	w	w	w	w	-	w	+	w	-	w	w	w	w	w	w	-	-	-	-	-
glycerol	+	+	+	w	w	w	+	w	-	w	+	w	w	+	w	w	+	w	+	+	w	+	+	w	+	+	w	+	+	+	+	w	+	-	w	+	-	+	+	+	w	w	w	+	w	+	w
L-aspartic acid	+	+	+	+	+	+	+	+	+	+	+	+	+	w	+	w	+	+	+	+	+	+	+	+	w	+	+	+	+	w	+	+	+	-	w	+	-	+	+	+	+	+	+	+	+	+	+
D-glucuronic acid	+	-	+	+	+	-	-	+	+	w	w	+	+	-	w	-	w	w	+	w	+	+	+	+	-	+	+	+	+	+	w	w	w	+	+	+	w	+	+	-	w	-	+	+	-	w	-
citric acid	+	+	+	+	+	+	+	+	+	+	+	+	+	+	+	+	+	+	+	+	+	+	+	+	+	+	+	+	+	+	+	+	+	w	+	+	+	+	+	+	+	+	+	+	+	+	+
α-ketobutyric acid	-	-	-	w	-	-	-	-	-	-	-	-	w	w	-	-	w	-	-	w	w	w	w	-	w	w	-	w	w	-	-	-	-	w	-	-	-	-	w	-	-	-	-	-	-	-	-
gentiobiose	-	-	-	-	-	-	-	-	-	-	-	-	-	-	-	-	-	w	w	w	-	-	w	-	-	-	-	-	-	w	-	-	w	w	w	-	-	-	w	w	w	-	-	-	w	-	-
N-acetyl-D-glucosamine	-	-	-	-	-	-	-	-	-	-	-	-	-	w	-	-	w	w	+	+	w	-	w	-	w	w	-	+	+	w	w	w	+	-	w	+	-	w	w	+	+	w	-	-	w	w	w
D-fucose	w	w	+	w	w	w	w	w	w	w	+	w	w	+	w	+	+	+	+	+	w	w	w	+	w	+	+	+	+	+	+	+	+	+	+	+	w	+	+	+	+	w	w	w	w	+	w
D-glucose-6-PO4	-	-	-	-	-	-	-	-	w	-	-	-	-	-	-	-	-	-	-	-	-	-	-	-	-	-	-	-	-	-	-	-	-	-	-	-	-	-	-	-	-	-	-	-	-	w	-
L-glutamic acid	+	+	+	+	+	+	+	+	+	+	+	+	+	w	+	+	+	+	+	+	+	+	+	w	+	+	+	+	+	+	+	+	+	-	+	+	w	+	+	+	+	+	+	+	+	+	+
glucuronamide	+	w	+	+	+	w	w	w	+	+	+	+	+	+	+	+	+	+	+	+	w	w	+	+	w	+	+	+	+	+	+	w	+	+	+	+	+	+	+	+	+	w	+	+	+	+	+
α-ketoglutaric acid	+	+	+	+	+	+	+	+	+	+	+	+	+	w	+	+	+	+	+	+	+	+	+	+	+	+	+	+	+	+	+	+	+	w	+	+	+	+	+	+	+	+	+	+	+	+	+
acetoacetic acid	-	-	-	-	-	-	+	-	-	-	-	-	-	-	-	-	-	-	w	w	-	-	-	-	-	-	w	-	-	-	-	-	-	w	w	-	-	-	-	-	w	w	-	-	w	w	-
sucrose	-	-	-	-	-	-	-	-	-	-	-	-	-	-	-	w	-	-	-	+	w	+	+	-	-	-	-	+	+	+	-	-	-	-	-	+	-	-	-	-	-	-	-	-	-	-	-
N-acetyl-β-D-mannosamine	-	-	-	-	-	-	-	-	-	-	-	-	-	-	-	-	-	-	-	-	-	-	-	-	-	-	-	-	-	-	-	-	-	-	-	-	-	-	-	-	-	-	-	-	-	-	-
L-fucose	w	w	w	w	w	w	w	w	w	w	w	+	w	w	w	w	w	+	+	w	w	w	w	w	w	w	w	w	w	w	w	w	w	+	w	+	w	+	w	+	w	w	-	w	w	w	w
D-fructose-6-PO4	w	w	w	w	w	w	w	w	-	w	w	w	w	w	w	w	w	+	+	w	w	w	w	w	w	w	w	w	w	w	w	w	w	+	w	w	w	w	w	+	+	w	w	+	+	+	w
L-histidine	+	+	+	+	+	+	+	+	+	+	+	+	+	+	-	w	-	-	w	w	w	+	w	-	w	+	w	+	+	+	w	w	w	-	+	-	w	w	+	+	+	+	+	w	+	+	+
mucic acid	+	+	+	+	+	-	+	+	+	+	+	+	+	+	+	+	+	+	+	+	+	+	+	+	-	+	+	+	+	+	+	+	+	-	+	+	-	+	+	+	+	+	+	+	-	-	+
D-malic acid	-	-	+	+	-	-	+	-	-	-	w	-	-	-	-	w	-	-	-	-	-	w	-	-	-	w	-	-	-	-	-	-	-	-	w	-	-	-	-	w	-	+	-	-	-	-	-
propionic acid	w	w	+	+	+	+	+	+	+	w	w	+	+	+	w	w	w	-	w	+	w	+	+	-	w	w	-	w	w	-	-	-	w	-	-	-	-	-	+	+	+	+	+	+	+	+	+
D-turanose	-	-	-	-	-	-	w	-	-	-	-	-	-	-	-	-	-	-	-	-	-	-	-	-	-	-	-	-	-	-	-	-	-	-	-	-	-	-	-	w	w	-	-	w	w	-	-
N-acetyl-D-galactosamine	-	-	-	-	-	-	-	-	-	-	-	-	-	-	-	-	-	-	-	-	-	-	-	-	-	-	-	-	-	-	-	-	-	-	-	-	-	-	-	-	-	-	-	-	-	-	-
L-rhamnose	-	-	-	w	-	-	w	-	-	-	w	w	-	w	-	-	w	w	w	w	w	-	w	-	w	w	+	w	w	w	w	w	w	+	w	-	+	w	w	w	w	w	-	-	-	-	-
D-aspartic acid	-	-	-	-	+	-	-	-	-	+	-	-	+	-	-	-	-	-	-	-	-	w	-	-	-	-	-	-	-	-	-	-	-	-	-	w	-	-	-	+	-	-	w	+	-	-	-
L-pyroglutamic acid	+	+	-	+	+	+	+	+	+	+	-	w	-	w	w	w	+	-	+	+	w	+	w	w	+	+	w	+	+	+	+	+	+	-	-	+	w	+	+	+	+	+	+	w	w	w	+
quinic acid	+	+	+	+	+	+	+	+	+	+	+	+	+	+	+	+	+	+	+	+	+	+	+	+	+	+	+	+	+	+	+	+	+	+	+	+	+	+	+	+	+	+	+	+	-	-	+
L-malic acid	+	+	+	+	+	+	+	+	+	+	+	+	+	+	+	+	+	+	+	+	+	+	+	+	+	+	+	+	+	+	+	+	+	-	w	+	+	+	+	+	+	+	+	+	+	+	+
acetic acid	+	+	+	+	+	+	+	+	+	+	+	+	+	+	w	+	+	+	+	+	+	+	+	+	+	+	w	+	+	+	+	+	+	w	+	+	+	+	+	+	+	+	+	+	+	+	+
stachyose	-	-	-	-	-	-	-	-	-	-	-	-	-	-	-	-	-	-	-	-	-	-	-	-	-	-	-	-	-	-	-	-	-	-	-	-	-	-	-	-	-	-	-	-	-	-	-
N-acetyl neuraminic acid	-	-	-	-	-	-	w	-	-	-	-	-	-	-	-	-	-	-	-	-	-	-	-	-	-	-	-	-	-	-	-	-	-	-	-	-	-	-	-	-	-	-	-	-	-	-	-
inosine	w	-	w	-	w	w	+	w	-	-	-	w	w	w	w	w	+	w	w	+	w	+	+	w	w	w	-	+	+	w	+	+	w	-	w	+	-	-	w	+	w	w	-	w	-	-	w
D-serine	+	w	+	w	w	w	-	w	w	+	w	-	-	-	-	w	+	-	w	+	-	w	w	-	+	+	-	+	+	w	+	+	+	-	-	-	w	+	w	w	-	w	w	w	w	w	w
L-serine	+	+	w	w	+	+	+	w	+	+	+	+	w	w	w	+	+	w	w	+	-	-	w	-	+	w	+	+	+	+	+	+	w	-	+	-	+	+	+	+	+	+	+	+	w	+	+
D-saccharic acid	+	-	+	+	+	-	-	+	+	+	+	+	+	+	+	+	+	w	+	+	+	+	+	+	-	+	w	+	+	+	+	+	+	-	w	+	-	w	+	+	+	+	+	+	-	-	-
bromo-succinic acid	-	w	-	-	-	-	-	-	-	-	-	-	-	-	-	-	w	-	-	w	w	w	w	-	-	-	-	-	-	-	-	-	-	-	-	w	-	-	-	w	w	-	-	-	-	-	-
formic acid	w	w	-	w	-	w	+	w	w	w	-	-	w	-	-	-	w	-	-	w	w	+	w	-	-	w	-	w	w	-	-	-	-	-	-	w	-	-	w	-	+	-	-	w	-	w	-
Symbols -, negative; +, positive, w, weak/borderline

## Sheet: Table S4
Species	Previous invalid names	Type strain	rpoD gene	Genome
Pseudomonas abietaniphila		ATCC 700689 = CIP 106708	FN554447.1	FNCO00000000.1
Pseudomonas abyssi		MT5	NTMR00000000.1	NTMR00000000.1
Pseudomonas aeruginosa		ATCC 10145 = LMG 1242 = DSM 50071	AB039607.1	CP012001.1
Pseudomonas aestus		CMAA1215	AVOY01000108.1	AVOY00000000.1
Pseudomonas aestusnigri		VGXO14 = CECT 8317	FN994281.2	NBYK00000000.1
Pseudomonas agarici		ATCC 25941 = LMG 2112	AB039563.1	FOAR00000000.1
Pseudomonas akappagea	Pseudomonas akapageensis	PS24 = CECT 9941 = LMG 31497	VXCP00000000.1	VXCP00000000.1
Pseudomonas alcaligenes		ATCC 14909 = NBRC 14159	AB039606.1	BATI00000000.1
Pseudomonas alcaliphila		LMG 23134 = JCM 10630	FN554448.1	FNAE00000000.1
Pseudomonas alkylphenolica		KL28 = JCM 16553	HE577794.1	CP009048.1
Pseudomonas allii		MAFF 301514 = ICMP 23680	LC548106.1	JABUHT000000000.1
Pseudomonas alloputida		LMG 29756	OLKK00000000.1	OLKK00000000.1
Pseudomonas amygdali		CFBP 3205 = NCPPB 2607 = LMG 13184	AB039509.1	JYHB00000000.1
Pseudomonas anguilliseptica		DSM 12111 = LMG 21629	FN554449.1	FNSC00000000.1
Pseudomonas antarctica		BS2772 = LMG 22709	FN554450.1	LT629704.1
Pseudomonas argentinensis		LMG 22563	FN554451.1	FORC00000000.1
Pseudomonas arsenicoxydans		CECT 7543	HE800488.1	LT629705.1
Pseudomonas asiatica		RYU5	LC435053.1	BLJF00000000.1
Pseudomonas asplenii		LMG 2137 = ATCC 23835	AB039593.1	LT629777.1
Pseudomonas asturiensis		LMG 26898	FRDA00000000.1	FRDA00000000.1
Pseudomonas asuensis		JCM 13501	BMNW01000008.1	BMNW00000000.1
Pseudomonas atacamensis		M7D1 = LMG 24280	SSBS01000004.1	SSBS00000000.1
Pseudomonas atagosis	Pseudomonas atagonensis	PS14 = CECT 9940 = LMG 31496	VXCA00000000.1	VXCA00000000.1
Pseudomonas avellanae		BPIC 631 = CIP 105176	FN554454.1	AKBS00000000.1
Pseudomonas aylmerense		S1E40	MAUE00000000.1	MAUE00000000.1
Pseudomonas azotifigens		6H33b = DSM 17556	AUDU00000000.1	AUDU00000000.1
Pseudomonas azotoformans		IAM 1603 = LMG 21611	AB039547.1	LT629702.1
Pseudomonas baetica		a390 = CECT 7720	FN678357.1	PHHE00000000.1
Pseudomonas balearica		DSM 6083 = CIP 105297	AB039605.1	CP007511.1
Pseudomonas baltica		MBT-2 = DSM 111761 = LMG 31955	JACMYH010000008.1	JACMYH000000000.1
Pseudomonas batumici		UCM_B-321	JXDG00000000.1	JXDG00000000.1
Pseudomonas bauzanensis		BZ93 = DSM 22558	HE800489.1	FOGN00000000.1
Pseudomonas benzenivorans		DSM 8628	HE800490.1	FNCT00000000.1
Pseudomonas bijieensis		L22-9 = CGMCC 1.18528 = LMG 31948	CP048810.1	CP048810.1
Pseudomonas bohemica		IA19	NKHL00000000.1	NKHL00000000.1
Pseudomonas borbori		DSM 17834 = LMG 23199	FN554456.1	FOWX00000000.1
Pseudomonas brassicacearum subsp. brassicacearum		DBK11 = DSM 13227 = CFBP 11706	AM084334.1	LT629713.1
Pseudomonas brassicae		MAFF 212427 = ICMP 23635	JAAHBU000000000.1	JAAHBU000000000.1
Pseudomonas brenneri		DSM 15294	FN554457.1	LT629800.1
Pseudomonas bubulae		TH39 = DSM 107389 = LMG 30831	UYJA01000004.1	UYJA00000000.1
Pseudomonas canadensis		2-92	AYTD00000000.1	AYTD00000000.1
Pseudomonas cannabina		CFBP 2341 = LMG 5096 = ICMP 2823	FN554458.1	LJPX00000000.1
Pseudomonas capeferrum		WCS358	JMIT01000005.1	JMIT00000000.1
Pseudomonas caricapapayae		LMG 2152 = ICMP 2855	AB039507.1	LJPW00000000.1
Pseudomonas carnis		DSM 107652 = LMG 30892	CABIVL010000001.1	CABIVL000000000.1
Pseudomonas caspiana		FBF102	HG805592.1	LOHF00000000.1
Pseudomonas cedrina subsp. cedrina		CFML 96-198 = DSM 17516	FN554459.1	LT629753.1
Pseudomonas cedrina subsp. fulgida		DSM 14938 = LMG 21467	HE586449.1	JAFHKH000000000.1
Pseudomonas cerasi		LMG 28609	LT222319.1	LT222319.1
Pseudomonas chaetocerotis	Pseudomonas chaetoceroseae	536 = LMG 31766 = DSM 111343	JACFYX010000006.1	JACFYX000000000.1
Pseudomonas chengduensis		MBR = DSM 26382	JX042517.1	FMZQ00000000.1
Pseudomonas chloritidismutans		AW-1	AOFQ00000000.1	AOFQ00000000.1
Pseudomonas chlororaphis subsp. aurantiaca		NCIB 10068 = LMG 21630	FN554452.1	LT629747.1
Pseudomonas chlororaphis subsp. aureofaciens		DSM 6698 = LMG 1245 = ATCC 13985	FN554453.1	LT629738.1
Pseudomonas chlororaphis subsp. chlororaphis		DSM 50083 = ATCC 9446	AB039549.1	CP027712.1
Pseudomonas chlororaphis subsp. piscium		DSM 21509	LT629761.1	LT629761.1
Pseudomonas cichorii		ATCC 10857	AB039526.1	FNIK00000000.1
Pseudomonas citronellolis		LMG 18378	AB039604.1	FOLS00000000.1
Pseudomonas coleopterorum		CECT 8695 = LMG 28558	KM888187.1	FNTZ00000000.1
Pseudomonas composti		C2 = CCUG 59231	FR716577.1	FOWP00000000.1
Pseudomonas congelans		LMG 21466 = DSM 14939	FN554460.1	FNJH00000000.1
Pseudomonas coronafaciens		NCPPB 600 = LMG 5060	JSED00000000.1	JSED00000000.1
Pseudomonas corrugata		ATCC 29736 = NCPPB 2445	AB039566.1	LIGR00000000.1
Pseudomonas costantinii		LMG 22119	FN554461.1	MDDR00000000.1
Pseudomonas cremoricolorata		DSM 17059	FN554462.1	AUEA00000000.1
Pseudomonas cremoris		WS 5106 = DSM 111143 = LMG 31863	MT274666.1	JAAXCY000000000.1
Pseudomonas crudilactis		UCMA 17988	WXVV00000000.1	WXVV00000000.1
Pseudomonas cuatrocienegasensis		CIP 109853	FOFP00000000.1	FOFP00000000.1
Pseudomonas cyclaminis		MAFF 301449 = ICMP 23720	LC582671.1	JADDUM000000000.1
Pseudomonas daroniae		FRB 228 = LMG 31087 = NCPPB 4672	QJUH01000011.1	QJUH00000000.1
Pseudomonas deceptionensis		DSM 26521 = CECT 7677	GU936596.1	JYKX00000000.1
Pseudomonas defluvii		WCHP16 = GDMCC1.1215 = CCTCC AB 2017103 = KCTC 52991	MT074679.1	MBPN00000000.1
Pseudomonas delhiensis		RLD-1	HE800493.1	FNEC00000000.1
Pseudomonas donghuensis		HYS	AJJP00000000.1	AJJP00000000.1
Pseudomonas dryadis		FRB 230 = LMG 31087 = NCPPB 4673	QJUN01000001.1	QJUN00000000.1
Pseudomonas duriflava		CGMCC 1.6858 = KCTC 22129	HE800494.1	VLKY00000000.1
Pseudomonas edaphica		RD25 = LMG 30152 = CECT 9373	VBVZ01000045.1	VBVZ00000000.1
Pseudomonas endophytica		BSTT44;CECT 8691T	LN624763.1	LLWH00000000.1
Pseudomonas entomophila		L48	CT573326.1	CT573326.1
Pseudomonas extremaustralis		DSM 17835	JN814374.1/HE800495.1	LT629689.1
Pseudomonas extremorientalis		LMG 19695	FN554464.1	MDGK00000000.1
Pseudomonas ficuserectae		ICMP 7848 = CCUG 32779	AB039501.1	LJQJ00000000.1
Pseudomonas fildesensis		KG01 = CECT 9084 = DSM 102036	LFMW01000004.1	LFMW00000000.1
Pseudomonas flavescens		LMG 18387	FN554465.1	FNDG00000000.1
Pseudomonas flexibilis		ATCC 29606	JRUD00000000.1	JRUD00000000.1
Pseudomonas floridensis		GEV388	MUIO00000000.1	MUIO00000000.1
Pseudomonas fluorescens		DSM 50090 = ATCC 13525	AB039545.1	LHVP00000000.1
Pseudomonas fluvialis		ASS-1	NMQV00000000.1	NMQV00000000.1
Pseudomonas formosensis		JCM 18415	FOYD00000000.1	FOYD00000000.1
Pseudomonas fragi		CECT 446	FN554466.1	LT629783.1
Pseudomonas frederiksbergensis		LMG 19851 = DSM 13022	AM084335.2	FNTF00000000.1
Pseudomonas fulva		ATCC 31418 = CIP 106765	AB039586.1	BBIQ00000000.1
Pseudomonas furukawaii		KF707	AP014862.1	AP014862.1
Pseudomonas fuscovaginae		LMG 2158	FN554467.1	LT629972.1
Pseudomonas gallaeciencis		V113	FN994225.2	LMAZ00000000.1
Pseudomonas glareae		KMM 9500	16S rRNA gene available: Not included in the analysis
Pseudomonas gelidicola		CIP 106748; IAM 1127; JCM 20065	No sequences available: Not included in the analysis
Pseudomonas gessardii		LMG 21604 = DSM 105469	FN554468.1	FNKR00000000.1
Pseudomonas glycinae		MS586 = NRRL B‐65441 = LMG 30275	CP014205.2	CP014205.2
Pseudomonas graminis		LMG 21661	FN554469.1	FOHW00000000.1
Pseudomonas granadensis		DSM 28040 = LMG 27940	HG764748.1	LT629778.1
Pseudomonas gregormendelii		LMG 28632	JADEVO010000031.1	JADEVO000000000.1
Pseudomonas grimontii		ATCC BAA-140	FN554470.1	FNKM00000000.1
Pseudomonas guangdongensis		CCTCC 2012022	LT629780.1	LT629780.1
Pseudomonas guariconensis		PCAVU11 = LMG 27394	HF674460.1/LN851842.1	FMYX00000000.1
Pseudomonas guguanensis		CC-G9V = JCM 18416	FNJJ00000000.1	FNJJ00000000.1
Pseudomonas guineae		M8 = LMG 24016	FN554471.1	FOQL00000000.1
Pseudomonas haemolytica		DSM 108988	VOIX00000000.1	VOIX00000000.1
Pseudomonas helleri		DSM 29165	JYLD00000000.1	JYLD00000000.1
Pseudomonas helmanticensis		LMG 28168 = CECT 8548	HG940517.1	2617270757*
Pseudomonas huaxiensis		WCHPs060044 = GDMCC 1.1396 = JCM 32907 = CCTCC AB 2018120 = CNCTC 7663	QKVL01000021.1	QKVL00000000.1
Pseudomonas humi		CCA1	BDGS00000000.1	BDGS00000000.1
Pseudomonas hunanensis		LV = CICC 10558 = NCCB 100446	KP151501.1	-
Pseudomonas hussainii		JCM 19513	FOAS00000000.1	FOAS00000000.1
Pseudomonas hutmensis		xwS2 = CCTCC AB 2018189 = KACC 19898	QJRG01000040.1	QJRG00000000.1
Pseudomonas hydrolytica		DSWY01 = DSM 106702 = CCTCC AB 2018053	MN080559.1	RWYR00000000.1	Signs of contamination: Not included in the analysis
Pseudomonas indica		LMG 23066	FN554472.1	FNFD00000000.1
Pseudomonas indoloxydans		JCM 14246	AB548146/HE800496.1	QASO00000000.1
Pseudomonas inefficax		DSM 108619	OPYN00000000.1	OPYN00000000.1
Pseudomonas izuensis		IzPS43_3003 = LMG 31527 = CECT 9963	WTFT01000024.1	WTFT00000000.1
Pseudomonas japonica		JCM 21532	HE577795.1	FZOL00000000.1
Pseudomonas jessenii		ATCC 700870 = CIP 105274	FN554473.1	FNTC00000000.1
Pseudomonas jilinensis		JS15-10A1 = CGMCC 1.16072 = LMG 30036	QJSA01000003.1	QJSA00000000.1
Pseudomonas jinjuensis		JCM 21621 = LMG 21316	FN554474.1	FNIJ00000000.1
Pseudomonas juntendi		DSM 109244 = JCM 33395	LC474103.1	BLJG00000000.1
Pseudomonas kairouanesis		KC12	LR130152.1	QUZU00000000.1
Pseudomonas karstica		HJ/4 = CCM 7891 = LMG 27930	WLYI01000008.1	WLYI00000000.1
Pseudomonas khazarica		TBZ2 = LMG 29674 = KCTC 52410	SBHZ01000006.1	SBHZ00000000.1
Pseudomonas kielensis		MBT-1 = DSM 111668 = LMG 31954	JACMYG010000004.1	JACMYG000000000.1
Pseudomonas kilonensis		DSM 13647	AM084336.1	LHVH00000000.1
Pseudomonas kirkiae		P4C = LMG 31089 = NCPPB 4674	QJUO01000048.1	QJUO00000000.1
Pseudomonas kitaguniensis		MAFF 212408 = ICMP 23530	VUAZ01000044.1	VUAZ00000000.1
Pseudomonas knackmussii		LMG 23759	FN554475.1	HG322950.1
Pseudomonas koreensis		LMG 21318	FN554476.1	LT629687.1
Pseudomonas kribbensis		DSM 100278	CP029608.1	CP029608.1
Pseudomonas kunmingensis		DSM 25974	FORS00000000.1	FORS00000000.1
Pseudomonas kuykendallii		NRRL B-59562	FNNU00000000.1	FNNU00000000.1
Pseudomonas lactis		DSM 29167	JYLO00000000.1	JYLO00000000.1
Pseudomonas lalkuanensis		PE08 = MCC 3792 = KCTC 72454 = CCUG 73691	CP043311.1	CP043311.1
Pseudomonas laurentiana		GSL-010 = JCM 32154	BMQU01000017.1	BMQU00000000.1
Pseudomonas laurylsulfatiphila		AP3_16	NIRS00000000.1	NIRS00000000.1
Pseudomonas laurylsulfatovorans	Pseudomonas laurylsulfativorans	AP3_22	MUJK00000000.1	MUJK00000000.1
Pseudomonas leptonychotis		P5773 = CCM 8849 = LMG 30618	MK125496.1	RFLV00000000.1
Pseudomonas libanensis		CIP 105460	FN554477.1	LT629699.1
Pseudomonas lini		CFBP 5737 = CIP 107460	FN554478.1	LT629746.1
Pseudomonas linyingensis		LMG 25967	FNZE00000000.1	FNZE00000000.1
Pseudomonas litoralis		2SM5	FN908485.1	LT629748.1
Pseudomonas lundensis		ATCC 49968 = LMG 13517	FN554479.1	JYKY00000000.1
Pseudomonas lurida		P 513/18 = DSM 15835 = LMG 21995	HE800497.1	PDJB00000000.1
Pseudomonas lutea		DSM 17257	JRMB01000004.1	JRMB00000000.1
Pseudomonas luteola		JCM 3352	FN554481.1	FOEV00000000.1
Pseudomonas mandelii		LMG 21607	FN554482.1	LT629796.1
Pseudomonas mangiferae		DMKU BBB3-04 = TBRC 7080 = JCM 32061	VJOY01000005.1	VJOY00000000.1
Pseudomonas mangrovi		TC-11	QASN00000000.1	QASN00000000.1
Pseudomonas marginalis		ATCC 10844	AB039575.1	FNSU00000000.1
Pseudomonas marincola		JCM 14761	FN554483.1	FPBC00000000.1
Pseudomonas massiliensis		CB1	CCYK00000000.1	CCYK00000000.1
Pseudomonas matsuisoli		CCMHH0089 = JCM 30078	MK191849.1	BMPO00000000.1
Pseudomonas mediterranea		CFBP 5447 = DSM 16733	AM084337.1	LT629790.1
Pseudomonas meliae		ICMP 6289	LJQT00000000.1	LJQT00000000.1
Pseudomonas mendocina		ATCC 25411 = NCTC 10897	AJ633567.1	BBQC00000000.1
Pseudomonas meridiana		CIP 108465	16S rRNA gene available: Not included in the analysis
Pseudomonas migulae		CCUG 43165	FN554486.1	FNTY00000000.1
Pseudomonas mohnii		DSM 18327 = CCUG 53115	FN554487.1	FNRV00000000.1
Pseudomonas monteilii		ATCC 700476 = DSM 14164	FN554488.1	JHYV00000000.1
Pseudomonas moorei		CCUG 53114	FN554489.1	FNKJ00000000.1
Pseudomonas moraviensis		DSM 16007	FN554490.1	LT629788.1
Pseudomonas mosselii		ATCC BAA-99	FN554491.1	JHYW00000000.1
Pseudomonas mucidolens		LMG 2223	AB039546.1	LT629802.1
Pseudomonas mucoides		P154a = CECT 30177 = CCUG 74874	LR797656.1	JACOPW000000000.1
Pseudomonas nabeulensis		E10B	LR130158.1	QUZT00000000.1
Pseudomonas neuropathica		P155 = CECT 30178 = CCUG 74875	LR797658.1	JACOPX000000000.1
Pseudomonas nicosulfuronedens		LAM1902 = JCM 33860 = KCTC 72830	SWDV01000032.1	SWDV00000000.1
Pseudomonas nitritireducens		LMG 25966	LT601022.1	WMBX00000000.1
Pseudomonas nitrititolerans		GL14 = CGMCC 1.13874 = NBRC 113853	RFFL01000002.1	RFFL00000000.1
Pseudomonas nitroreducens		LMG 21614 = ATCC 33634	FN554492.1	FZOM00000000.1
Pseudomonas nosocomialis		CCUG 58779	LT600933.1	QLAF00000000.1
Pseudomonas oceani		DSM 100277	KU187948.1	PPSK00000000.1
Pseudomonas oleovorans subsp. oleovorans		DSM 1095 = ATCC 8062	AB039601.1	NIUB00000000.1
Pseudomonas orientalis		BS2775 = DSM 17489	FN554493.1	LT629782.1
Pseudomonas oryzae		KCTC 32247	LT629751.1	LT629751.1
Pseudomonas oryzihabitans		NBRC 102199 = ATCC 43272	FN554494.1	BBIT00000000.1
Pseudomonas otitidis		DSM 17224	FN554495.1	FOJP00000000.1
Pseudomonas ovata		F51 = KCTC 62133 = MCCC 1K03458	MH684588.1	QFFU00000000.1
Pseudomonas pachastrellae		JCM 12285 = CCUG 46540	FN554496.1	FOUD00000000.1
Pseudomonas palleroniana		BS3265 = LMG 23076	FN554497.1	FNUA00000000.1
Pseudomonas panacis		BS2778 = CIP 108524	FN554498.1	FNSP00000000.1
Pseudomonas panipatensis		CCM 7469	FN554499.1	FNDS00000000.1
Pseudomonas paracarnis		V5/DAB/2/5 = DSM 111363 = LMG 31846	CAJFCN010000002.1	CAJFCN000000000.1
Pseudomonas parafulva		DSM 17004	FN554500.1	AUEB00000000.1
Pseudomonas paralactis		DSM 29164	JYLN00000000.1	JYLN00000000.1
Pseudomonas pelagia		CL-AP6 = JCM 15562	FN908495.1	AROI00000000.1
Pseudomonas peli		DSM 17833 = LMG 23201	FN554501.1	FMTL00000000.1
Pseudomonas perfectomarina		ATCC 14405 = CCUG 16156	AGSL00000000.1	AGSL00000000.1
Pseudomonas persica		LMG 29757	OLKL00000000.1	OLKL00000000.1
Pseudomonas pertucinogena		LMG 1874	FN554502.1	2571042921*
Pseudomonas pharmacofabricae	Pseudomonas pharmafabricae	ZYSR67-Z	PIYS00000000.1	PIYS00000000.1
Pseudomonas phragmitis		S-6-2 = CGMCC 1.15798 = KCTC 52539	MF417820.1	CP020100.1
Pseudomonas piscium	illegitimate name	P50 = CECT 30175 = CCUG 74871	LR797625.1	JACMYF000000000.1
Pseudomonas pisciculturae		P115 = CECT 30173 = CCUG 74873	LR797640.1	JACVZE000000000.1
Pseudomonas plecoglossicida		DSM 15088 = ATCC 700383 = CIP 106493	FN554503.1	BBIV00000000.1
Pseudomonas poae		BS2776 = LMG 21465 = DSM 14936	FN554504.1	LT629706.1
Pseudomonas pohangensis		DSM 17875	LT629785.1	LT629785.1
Pseudomonas populi		CCTCC AB 2013069	LT837807.1	-
Pseudomonas profundi		M5	VTPZ00000000.1	VTPZ00000000.1
Pseudomonas prosekii		LMG 26867	JN814373.1	LT629762.1
Pseudomonas protegens		CHA0 = DSM 19095	X84416.1	CP003190.1
Pseudomonas proteolytica		BS2985 = CIP 108464	FN554505.1	FNTR00000000.1
Pseudomonas pseudoalcaligenes subsp. pseudoalcaligenes		NBRC 14167	AB039602.1	BDAJ00000000.1
Pseudomonas psychrophila		BS3667 = DSM 17535	FN554506.1	LT629795.1
Pseudomonas psychrotolerans		DSM 15758 = LMG 21977	FN554507.1	FMWB00000000.1
Pseudomonas punonensis		CECT 8089	FRBQ00000000.1	FRBQ00000000.1
Pseudomonas putida		NBRC 14164 = ATCC 12633	AB039581.1	AP013070.1
Pseudomonas pyomelaminifaciens		MR 02	PESJ00000000.1	PESJ00000000.1
Pseudomonas qingdaonensis		JJ3	PHTD00000000.1	PHTD00000000.1
Pseudomonas reidholzensis		CCOS 865	LT009713.1	UNOZ00000000.1
Pseudomonas reinekei		MT1 = CCUG 53116	FN554508.1	MSTQ00000000.1
Pseudomonas resinovorans		DSM 21078 = LMG 2274	FN554509.1	AUIE00000000.1
Pseudomonas rhizoryzae		RY24 = JCM 33201 = ACCC 61555	SULM01000007.1	SULM00000000.1
Pseudomonas rhizosphaerae		DSM 16299 = LMG 21640	FN554510.1	CP009533.1
Pseudomonas rhodesiae		BS2777 = LMG 17764	FN554511.1	LT629801.1
Pseudomonas sabulinigri		JCM 14963 = KCTC 22137	FN908492.1	LT629763.1
Pseudomonas sagittaria		JCM 18195	FOXM00000000.1	FOXM00000000.1
Pseudomonas salegens		CECT 8338	LT629787.1	LT629787.1
Pseudomonas salina		XCD-X85	KP075009.1	VTTI00000000.1
Pseudomonas saliphila		16W4-4-3 = CGMCC 1.13350 = KCTC 72619	VTVA01000012.1	VTVA00000000.1
Pseudomonas salomonii		LMG 22120	FN554512.1	MDFI00000000.1
Pseudomonas saponiphila		DSM 9751	HE800499.1	FNTJ00000000.1
Pseudomonas saudimassiliensis		12M76	LK391969.1	LK391969.1
Pseudomonas saudiphocaensis		20 BN	CCSF00000000.1	CCSF00000000.1
Pseudomonas savastanoi		ICMP4352 = LMG 2209	AB039514.1	LJRJ00000000.1
Pseudomonas saxonica		WS 5072 = DSM 108989 = LMG 31234	VFIP01000017.1	VFIP00000000.1
Pseudomonas sediminis		PI11	NIQU00000000.1	NIQU01000000.1
Pseudomonas segetis		CIP 108523 = IMSNU 14101	HE800500.1	FZOG00000000.1
Pseudomonas seleniipraecipitans	Pseudomonas seleniipraecipitatus	LMG 25475	HE800501.1	FNBM00000000.1
Pseudomonas sesami		SI-P133	16S rRNA gene available: Not included in the analysis
Pseudomonas shirazica		LMG 29953	OLKI00000000.1	OLKI00000000.1
Pseudomonas sichuanensis		WCHPs060039 = TC-11	QKVM00000000.1	QKVM00000000.1
Pseudomonas sihuiensis		KCTC 32246	LT629797.1	LT629797.1
Pseudomonas silesiensis		A3	CP014870.1	CP014870.1
Pseudomonas simiae		OLi	FN554513.1	MDFH00000000.1
Pseudomonas sivasensis		P7 = CCUG 74260 = CECT 30107	JAAOWU010000002.1	JAAOWU000000000.1
Pseudomonas soli		LMG 27941	HF930597.1	FOEQ00000000.1
Pseudomonas songnenensis		NEAU-ST5-5	KP151498.1	RFFN00000000.1
Pseudomonas spelaei		SJ/9/1 = CCM 7893 = LMG 27931	WNNK01000015.1	WNNK00000000.1
Pseudomonas straminea		JCM 2783 = LMG 21615	AB039600.1	FOMO00000000.1
Pseudomonas stutzeri		CGMCC 1.1803 = ATCC 17588	AJ631316.1	CP002881.1
Pseudomonas synxantha		LMG 2190 = ATCC 9890	AB039550.1	LT629786.1
Pseudomonas syringae		NCPPB 281	AB039516.1	JALK00000000.1
Pseudomonas taeanensis		MS-3 = KCTC 22612	HE800502.1	AWSQ00000000.1
Pseudomonas taetrolens		LMG 2336	AB039523.1	JYLA00000000.1
Pseudomonas taiwanensis		DSM 21245	HE577796.1	AUEC00000000.1
Pseudomonas tarimensis		CCTCC AB 2013065; KCTC 42447; MA-69	rpoD too short and no genome: Not included in the analysis
Pseudomonas thermotolerans		DSM 14292 = CIP 107795	FN554514.1	AQPA00000000.1
Pseudomonas thivervalensis		DSM 13194 = CFBP 11261	AM084338.2	LHVE00000000.1
Pseudomonas tianjinensis		KCTC 52977	16S rRNA gene available: Not included in the analysis
Pseudomonas tolaasii		ATCC 33618 = NCPPB 2192	AB039561.1	PHHD00000000.1
Pseudomonas toyotomiensis		NCIMB 14511 = JCM 15604	AB548145.1	FOXK00000000.1
Pseudomonas tremae		ICMP 9151 = LMG 22121	DQ072714.1/FN554463.1	LJRO00000000.1
Pseudomonas trivialis		DSM 14937 = LMG 21464	FN554515.1	JYLK00000000.1
Pseudomonas tructae		SNU WT1 = KCTC 72265 = JCM 33436	CP035952.1	CP035952.1
Pseudomonas tuomuerensis		JCM 14085 = CECT 7766	AB571152.1	JTAK00000000.1
Pseudomonas turukhanskensis		IB-1.1	LT219438.1	-
Pseudomonas typographi		CA3A = CECT 30101 = LMG 31781	JAAOCA010000001.1	JAAOCA000000000.1
Pseudomonas umsongensis		BS3657 = LMG 21317	FN554516.1	LT629767.1
Pseudomonas urumqiensis		T3	RBZQ00000000.1	RBZQ00000000.1
Pseudomonas vancouverensis		BS3656 = ATCC 700688	FN554517.1	LT629803.1
Pseudomonas veronii		DSM 11331 = LMG 17761	FN554518.1	JYLL00000000.1
Pseudomonas versuta		L10.10	KY264773.1	CP012676.1
Pseudomonas viciae		11K1	CP035088.1	CP035088.1
Pseudomonas viridiflava		ICMP 2848 = ATCC 13223	AB039520.1	LJRS00000000.1
Pseudomonas vranovensis		DSM 16006	HE577793.1	AUED00000000.1
Pseudomonas wadenswillerensis		CCOS 864	UIDD00000000.1	UIDD00000000.1
Pseudomonas weihenstephanensis		DSM 29166	JYLF00000000.1	JYLF00000000.1
Pseudomonas xanthomarina		LMG 23572 = CCUG 46543	AM905872.1	LT629970.1
Pseudomonas xiamenensis		JCM 13530	EF596884.1	2576861402*
Pseudomonas xinjiangensis		NRRLB-51270	LT629736.1	LT629736.1
Pseudomonas xionganensis		CGMCC 1.17250; KCTC 72658; R-22-3 w-18	No sequences available: Not included in the analysis
Pseudomonas yamanorum		LMG 27247	LT629793.1	LT629793.1
Pseudomonas yangmingensis		DSM 24213	FOUI00000000.1	FOUI00000000.1
Pseudomonas zeshuii		KACC 15471	FQYS00000000.1	FQYS00000000.1
Pseudomonas zhaodongensis		DSM 27559	KP151499.1	RFFM00000000.1
Azomonas agilis		DSM 375	VLKG01000009.1	VLKG00000000.1
Azomonas macrocytogenes		CECT 4462	JACHXI010000001.1	JACHXI000000000.1
Azotobacter beijerinckii		ICMP 8673	FOFJ00000000.1	FOFJ00000000.1
Azotobacter chroococcum		ATCC 9043	SJAA00000000.1	SJAA00000000.1
Azotobacter salinestris		KACC 13899	CP045302.1	CP045302.1
Cellvibrio japonicus		Ueda107	CP000934.1	CP000934.1
Entomomonas moraniae		QZS01	CP029822.1	CP029822.1
Oblitimonas alkaliphila		B4199	CP012358.1	CP012358.1
Thiopseudomonas caeni	Pseudomonas caeni	HY-14 = CECT 7778 = LMG 24390	HE800491.1	ATXQ00000000.1
Thiopseudomonas denitrificans		DSM 28679	SNYK01000007.1	SNYK00000000.1
Ventosimonas gracilis		CV58	LSZO01000006.1	LSZO00000000.1
* IMG genome ID
	Not validly published

## Sheet: TableS5
		1	2	3	4	5	6	7	8	9	10	11	12	13	14	15	16	17	18	19	20	21	22	23	24	25	26	27	28	29	30	31	32	33	34	35	36	37	38	39	40	41	42	43	44	45	46	47	48
1	C. japonicus Ueda 107		50.68	50.99	52.36	51.98	51.06	51.52	52.28	52.13	51.15	50.15	53.04	52.13	50.46	51.67	51.06	50.6	50.3	49.55	49.4	51.06	48.79	49.32	53.82	54.56	55.02	49.69	49.69	50.46	50.15	53.34	53.8	53.04	54.86	53.34	53.95	52.5	52.35	52.81	53.04	53.81	50.38	50.83	51.89	49.92	48.56	49.77	49.17
2	P. abyssi	50.68		99.24	92.82	83.51	82.14	78.02	72.98	72.98	73.13	71.6	72.67	73.28	72.82	73.74	73.28	75.19	75.49	74.89	74.66	74.28	69.44	69.3	65.91	65.96	65.51	63.07	63.07	64.74	63.37	66.67	66.82	66.11	66.82	65.91	65.31	65.56	65.86	66.16	67.27	65.05	60.54	63.25	66.42	65.06	66.57	67.77	67.32
3	P. gallaeciencis	50.99	99.24		92.98	83.97	82.14	77.86	72.82	72.82	73.59	71.6	72.67	73.28	72.82	73.44	73.28	75.34	75.19	74.58	74.66	73.83	69.29	69	66.06	66.11	65.66	63.07	63.07	64.74	63.37	66.67	67.12	66.26	66.97	66.06	65.16	66.01	66.01	66.31	67.27	65.05	60.84	63.55	66.42	65.36	66.57	67.47	67.92
4	P. pachastrellae	52.36	92.82	92.98		82.29	81.53	78.63	72.37	72.52	72.82	72.21	72.98	73.89	73.28	75.27	72.37	75.04	75.19	73.98	74.66	74.13	70.5	68.39	65.6	65.51	65.05	62.01	62.01	63.83	62.61	66.37	66.52	65.81	66.82	65.46	65.76	65.56	65.86	65.86	66.67	65.05	58.73	61.45	65.36	63.4	66.72	66.11	66.87
5	P. aestusnigri	51.98	83.51	83.97	82.29		88.67	75.76	73.51	73.51	71.82	70.75	71.67	73.81	72.13	74.73	72.28	73.41	74.17	74.05	74.4	73.72	68.89	69.66	65.65	65.26	65.86	61.15	61.15	62.37	61.46	67.02	67.17	66.16	67.02	65.81	64.01	66.06	66.21	65.31	66.72	66.31	59.85	61.35	63.91	62.86	65.86	67.07	64.96
6	P. oceani	51.06	82.14	82.14	81.53	88.67		75	73.97	73.51	68.45	70.44	71.21	72.89	69.98	73.97	72.28	71.75	73.56	71.93	74.4	71.3	68.59	69.51	65.35	65.71	64.65	61.15	61.15	62.67	61.61	65.81	65.96	65.11	65.66	64.91	64.16	65.16	65.31	64.1	67.02	64.5	57.89	61.35	63.46	62.56	64.06	64.66	63.91
7	P. sabulinigri	51.52	78.02	77.86	78.63	75.76	75		75.91	75.46	74.39	73.02	75	74.7	73.02	74.54	74.09	75.23	74.47	74.77	73.5	73.56	71.15	69.2	65.2	65.26	64.5	63.13	63.13	64.95	62.06	67.32	67.47	66.92	66.57	65.66	65.66	63.95	64.25	63.8	65.81	66.31	62.41	61.65	66.17	65.26	67.52	66.92	66.32
8	P. jilinensis	52.28	72.98	72.82	72.37	73.51	73.97	75.91		98.61	73.69	72.92	75.5	73.2	70.29	78.15	75.5	72.51	71.75	72.56	71.41	71.45	68.09	71.56	66.57	66.62	66.01	62.67	62.67	64.19	61.61	67.62	67.77	66.77	68.37	66.87	64.31	66.37	66.67	66.67	68.07	66.77	63.44	62.24	64.81	65.91	66.67	65.76	65.61
9	P. phragmitis	52.13	72.98	72.82	72.52	73.51	73.51	75.46	98.61		73.54	73.38	75.8	73.05	70.44	78	75.5	72.36	71.9	73.17	70.96	71.6	67.93	70.8	66.26	66.01	65.71	62.37	62.37	63.88	61.15	67.47	67.62	66.62	68.07	66.57	64.16	66.37	66.67	66.67	68.07	66.77	63.29	62.24	64.51	65.76	66.82	65.76	66.06
10	P. pelagia	51.15	73.13	73.59	72.82	71.82	68.45	74.39	73.69	73.54		79.54	75.19	74.27	74.58	73.66	72.89	72.21	70.69	72.26	69.76	67.98	66.26	66.51	63.36	63.58	63.43	63.01	63.01	61.8	61.8	65.05	65.2	64.95	65.05	64.9	63.69	62.73	62.73	63.33	65.05	65.25	61.18	61.14	64.81	64.06	65.71	65.86	65.41
11	P. salina	50.15	71.6	71.6	72.21	70.75	70.44	73.02	72.92	73.38	79.54		74.73	75.96	75.19	74.73	72.13	70.39	68.88	71.19	69.61	68.28	65.81	64.53	63.07	63.14	62.54	61.15	61.15	61.61	59.94	64.61	65.06	64.2	65.96	63.25	63.4	64.71	64.71	65.16	66.57	64.95	63.01	61.05	63.76	63.46	66.47	65.86	64.66
12	P. salegens	53.04	72.67	72.67	72.98	71.67	71.21	75	75.5	75.8	75.19	74.73		75.19	73.97	74.89	71.98	69.64	70.69	71.78	70.81	69.64	68.59	67.38	66.11	66.62	66.47	64.64	64.64	65.86	63.88	65.96	65.81	65.86	67.92	65.81	63.7	65.76	65.76	66.06	67.47	66.92	61.95	63.16	65.11	65.41	64.81	64.96	65.56
13	P. profundi	52.13	73.28	73.28	73.89	73.81	72.89	74.7	73.2	73.05	74.27	75.96	75.19		86.92	80	79.48	74.92	74.32	74.81	73.5	72.21	69.95	67.68	65.35	65.26	64.5	62.06	62.06	62.67	61.15	67.77	67.77	68.28	68.52	67.17	66.27	66.06	66.37	66.97	69.43	68.13	59.55	62.26	65.26	64.06	65.56	65.26	63.46
14	P. saliphila	50.46	72.82	72.82	73.28	72.13	69.98	73.02	70.29	70.44	74.58	75.19	73.97	86.92		78.77	76.57	73.41	73.11	73.6	73.2	71.3	69.04	64.94	61.7	61.48	61.63	62.82	62.52	62.22	61.61	64.46	64.76	64.95	66.57	64.31	63.4	63.5	63.5	63.65	66.87	65.11	59.7	60.15	63.76	62.41	63.91	64.36	62.41
15	P. populi	51.67	73.74	73.44	75.27	74.73	73.97	74.54	78.15	78	73.66	74.73	74.89	80	78.77		76.72	73.87	73.26	74.81	73.05	74.17	70.71	67.53	63.68	63.44	63.44	62.03	62.03	62.03	60.36	67.92	67.77	66.47	68.22	66.42	64.76	66.67	66.97	65.92	68.37	66.16	60.73	61.78	64.21	64.25	66.21	66.52	64.1
16	P. xinjiangensis	51.06	73.28	73.28	72.37	72.28	72.28	74.09	75.5	75.5	72.89	72.13	71.98	79.48	76.57	76.72		72.51	73.72	74.51	72.46	71	67.53	67.38	64.89	65.41	64.95	64.04	64.04	63.43	61.15	66.42	66.42	66.47	66.72	67.47	65.21	65.46	65.61	66.21	68.67	68.13	59.7	61.5	65.86	64.96	65.26	66.17	65.71
17	P. bauzanensis	50.6	75.19	75.34	75.04	73.41	71.75	75.23	72.51	72.36	72.21	70.39	69.64	74.92	73.41	73.87	72.51		90.44	85.13	80.69	77.34	74.62	71.17	64.76	64.07	62.87	61.93	61.78	62.69	59.21	66.27	66.42	65.51	66.27	64.16	62.95	63.91	63.61	64.21	65.21	65.41	61.35	63.61	64.96	63.91	66.92	66.62	63.91
18	P. saudimassiliensis	50.3	75.49	75.19	75.19	74.17	73.56	74.47	71.75	71.9	70.69	68.88	70.69	74.32	73.11	73.26	73.72	90.44		84.67	81.89	77.95	75.53	73.6	66.42	65.87	64.67	61.93	61.78	64.2	61.63	66.72	66.87	66.27	67.47	65.81	64.16	64.36	64.66	64.21	65.96	66.62	60.75	64.21	66.77	65.71	67.22	67.82	65.86
19	P. litoralis	49.55	74.89	74.58	73.98	74.05	71.93	74.77	72.56	73.17	72.26	71.19	71.78	74.81	73.6	74.81	74.51	85.13	84.67		79.04	78.25	74.92	70.95	65.06	64.67	64.07	62.39	62.54	62.84	60.57	64.76	65.36	65.06	65.66	62.5	62.95	64.51	64.21	63.76	65.51	66.31	60.3	62.41	64.21	62.41	66.92	67.37	65.41
20	P. xiamenensis	49.4	74.66	74.66	74.66	74.4	74.4	73.5	71.41	70.96	69.76	69.61	70.81	73.5	73.2	73.05	72.46	80.69	81.89	79.04		80.69	76.05	70.36	66.62	66.92	66.77	63.77	63.47	63.92	60.93	67.66	67.81	67.37	67.51	65.12	63.92	65.57	65.87	64.97	67.22	67.22	60.63	63.02	66.32	65.87	68.71	68.86	67.37
21	P. formosensis	51.06	74.28	73.83	74.13	73.72	71.3	73.56	71.45	71.6	67.98	68.28	69.64	72.21	71.3	74.17	71	77.34	77.95	78.25	80.69		79.91	69.49	65.06	64.67	64.97	62.99	62.99	63.29	60.57	68.37	68.22	68.07	67.62	66.11	64.46	66.47	66.77	66.02	70.03	68.88	59.85	62.41	64.96	64.21	67.67	67.52	65.41
22	P. pertucinogena	48.79	69.44	69.29	70.5	68.89	68.59	71.15	68.09	67.93	66.26	65.81	68.59	69.95	69.04	70.71	67.53	74.62	75.53	74.92	76.05	79.91		67.38	64.61	64.07	63.47	63.29	63.14	64.95	62.24	64.61	64.76	63.7	65.21	61.9	63.1	63.31	63.61	63.76	64.61	65.11	58.65	62.41	64.01	61.9	64.91	65.36	63.55
23	P. yangmingensis	49.32	69.3	69	68.39	69.66	69.51	69.2	71.56	70.8	66.51	64.53	67.38	67.68	64.94	67.53	67.38	71.17	73.6	70.95	70.36	69.49	67.38		63.73	63.61	63.01	61.15	61.15	62.06	59.03	65.71	65.86	64.8	64.5	64.95	61.63	64.81	65.11	65.41	65.26	66.01	58.35	63.91	64.36	62.26	62.56	62.11	62.11
24	P. oryzihabitans	53.82	65.91	66.06	65.6	65.65	65.35	65.2	66.57	66.26	63.36	63.07	66.11	65.35	61.7	63.68	64.89	64.76	66.42	65.06	66.62	65.06	64.61	63.73		97.4	93.26	66.62	66.46	67.68	67.43	73.2	73.2	72.5	74.27	73.35	71.36	73.39	73.7	72.32	74.73	70.21	61.72	66.97	67.02	66.72	65.96	66.27	66.42
25	P. psychrotolerans	54.56	65.96	66.11	65.51	65.26	65.71	65.26	66.62	66.01	63.58	63.14	66.62	65.26	61.48	63.44	65.41	64.07	65.87	64.67	66.92	64.67	64.07	63.61	97.4		94.18	66.82	66.97	68.18	67.33	71.93	71.93	71.23	73.14	72.69	70.41	72.75	73.06	72.3	73.75	70.24	61.48	67.02	67.22	66.77	66.17	66.62	66.62
26	P. rhizoryzae	55.02	65.51	65.66	65.05	65.86	64.65	64.5	66.01	65.71	63.43	62.54	66.47	64.5	61.63	63.44	64.95	62.87	64.67	64.07	66.77	64.97	63.47	63.01	93.26	94.18		66.67	66.82	68.18	67.63	72.53	72.69	72.3	73.75	73.44	71.47	73.06	73.36	71.99	72.23	71.15	61.48	68.37	67.07	66.77	66.17	66.92	67.07
27	P. luteola	49.69	63.07	63.07	62.01	61.15	61.15	63.13	62.67	62.37	63.01	61.15	64.64	62.06	62.82	62.03	64.04	61.93	61.93	62.39	63.77	62.99	63.29	61.15	66.62	66.82	66.67		99.69	89.18	81.61	66.46	66.62	66.46	69.5	68.44	68.59	70	69.7	69.34	68.13	69.86	59.12	63.09	62.99	61.33	64.5	63.9	64.5
28	P. zeshuii	49.69	63.07	63.07	62.01	61.15	61.15	63.13	62.67	62.37	63.01	61.15	64.64	62.06	62.52	62.03	64.04	61.78	61.78	62.54	63.47	62.99	63.14	61.15	66.46	66.97	66.82	99.69		88.87	81.92	66.46	66.62	66.46	69.5	68.44	68.59	69.7	69.39	69.03	67.98	69.86	59.12	63.24	62.69	61.33	64.65	64.05	64.65
29	P. asuensis	50.46	64.74	64.74	63.83	62.37	62.67	64.95	64.19	63.88	61.8	61.61	65.86	62.67	62.22	62.03	63.43	62.69	64.2	62.84	63.92	63.29	64.95	62.06	67.68	68.18	68.18	89.18	88.87		82.84	65.71	65.86	64.95	69.04	67.07	67.83	68.33	68.64	68.28	67.53	68.95	60.79	63.69	63.6	61.63	63.6	64.35	63.9
30	P. duriflava	50.15	63.37	63.37	62.61	61.46	61.61	62.06	61.61	61.15	61.8	59.94	63.88	61.15	61.61	60.36	61.15	59.21	61.63	60.57	60.93	60.57	62.24	59.03	67.43	67.33	67.63	81.61	81.92	82.84		65.75	65.6	64.08	68.65	67.28	65.91	66.57	66.87	65.91	66.21	68.19	60.33	62.78	62.54	62.08	63.9	64.65	64.5
31	P. citronellolis	53.34	66.67	66.67	66.37	67.02	65.81	67.32	67.62	67.47	65.05	64.61	65.96	67.77	64.46	67.92	66.42	66.27	66.72	64.76	67.66	68.37	64.61	65.71	73.2	71.93	72.53	66.46	66.46	65.71	65.75		99.38	95.98	87.48	84.77	84.85	81.78	82.08	80.55	80.15	73.28	64.13	66.82	70.5	68.67	68.67	68.37	67.92
32	P. humi	53.8	66.82	67.12	66.52	67.17	65.96	67.47	67.77	67.62	65.2	65.06	65.81	67.77	64.76	67.77	66.42	66.42	66.87	65.36	67.81	68.22	64.76	65.86	73.2	71.93	72.69	66.62	66.62	65.86	65.6	99.38		95.98	87.64	84.62	84.85	82.24	82.24	80.7	80.31	73.59	64.29	67.12	70.65	68.52	68.67	68.37	68.37
33	P. delhiensis	53.04	66.11	66.26	65.81	66.16	65.11	66.92	66.77	66.62	64.95	64.2	65.86	68.28	64.95	66.47	66.47	65.51	66.27	65.06	67.37	68.07	63.7	64.8	72.5	71.23	72.3	66.46	66.46	64.95	64.08	95.98	95.98		86.09	84.15	85.32	82.46	82.77	81.23	79.85	73.59	62.92	65.91	69.44	68.22	68.07	67.47	67.32
34	P. jinjuensis	54.86	66.82	66.97	66.82	67.02	65.66	66.57	68.37	68.07	65.05	65.96	67.92	68.52	66.57	68.22	66.72	66.27	67.47	65.66	67.51	67.62	65.21	64.5	74.27	73.14	73.75	69.5	69.5	69.04	68.65	87.48	87.64	86.09		84.72	84.32	83.61	83.92	83	82.31	74.66	64.13	66.52	71.26	68.83	69.34	68.58	68.58
35	P. panipatensis	53.34	65.91	66.06	65.46	65.81	64.91	65.66	66.87	66.57	64.9	63.25	65.81	67.17	64.31	66.42	67.47	64.16	65.81	62.5	65.12	66.11	61.9	64.95	73.35	72.69	73.44	68.44	68.44	67.07	67.28	84.77	84.62	84.15	84.72		83.49	81.47	81.78	80.86	80.92	74.66	62.92	67.12	69.14	68.52	65.66	65.96	66.72
36	P. knackmussii	53.95	65.31	65.16	65.76	64.01	64.16	65.66	64.31	64.16	63.69	63.4	63.7	66.27	63.4	64.76	65.21	62.95	64.16	62.95	63.92	64.46	63.1	61.63	71.36	70.41	71.47	68.59	68.59	67.83	65.91	84.85	84.85	85.32	84.32	83.49		79.79	79.79	78.25	77.85	74.66	61.25	66.52	68.99	66.72	66.77	66.16	65.86
37	P. nitritireducens	52.5	65.56	66.01	65.56	66.06	65.16	63.95	66.37	66.37	62.73	64.71	65.76	66.06	63.5	66.67	65.46	63.91	64.36	64.51	65.57	66.47	63.31	64.81	73.39	72.75	73.06	70	69.7	68.33	66.57	81.78	82.24	82.46	83.61	81.47	79.79		99.69	95.54	82.24	75.76	64.29	68.78	70.35	68.52	67.62	67.32	68.07
38	P. nitroreducens	52.35	65.86	66.01	65.86	66.21	65.31	64.25	66.67	66.67	62.73	64.71	65.76	66.37	63.5	66.97	65.61	63.61	64.66	64.21	65.87	66.77	63.61	65.11	73.7	73.06	73.36	69.7	69.39	68.64	66.87	82.08	82.24	82.77	83.92	81.78	79.79	99.69		95.85	82.54	76.07	64.29	68.78	70.65	68.83	67.92	67.62	68.07
39	P. nicosulfuronedens	52.81	66.16	66.31	65.86	65.31	64.1	63.8	66.67	66.67	63.33	65.16	66.06	66.97	63.65	65.92	66.21	64.21	64.21	63.76	64.97	66.02	63.76	65.41	72.32	72.3	71.99	69.34	69.03	68.28	65.91	80.55	80.7	81.23	83	80.86	78.25	95.54	95.85		80.4	74.7	64.44	68.33	70.35	68.07	67.77	67.17	67.62
40	P. aeruginosa	53.04	67.27	67.27	66.67	66.72	67.02	65.81	68.07	68.07	65.05	66.57	67.47	69.43	66.87	68.37	68.67	65.21	65.96	65.51	67.22	70.03	64.61	65.26	74.73	73.75	72.23	68.13	67.98	67.53	66.21	80.15	80.31	79.85	82.31	80.92	77.85	82.24	82.54	80.4		76.79	64.29	67.87	69.29	69.28	68.52	70.03	67.17
41	P. indica	53.81	65.05	65.05	65.05	66.31	64.5	66.31	66.77	66.77	65.25	64.95	66.92	68.13	65.11	66.16	68.13	65.41	66.62	66.31	67.22	68.88	65.11	66.01	70.21	70.24	71.15	69.86	69.86	68.95	68.19	73.28	73.59	73.59	74.66	74.66	74.66	75.76	76.07	74.7	76.79		65.24	72.77	72.53	72.05	71.6	72.05	71.6
42	P. pohangensis	50.38	60.54	60.84	58.73	59.85	57.89	62.41	63.44	63.29	61.18	63.01	61.95	59.55	59.7	60.73	59.7	61.35	60.75	60.3	60.63	59.85	58.65	58.35	61.72	61.48	61.48	59.12	59.12	60.79	60.33	64.13	64.29	62.92	64.13	62.92	61.25	64.29	64.29	64.44	64.29	65.24		67.02	66.92	68.29	68.6	68.29	67.99
43	P. mangrovi	50.83	63.25	63.55	61.45	61.35	61.35	61.65	62.24	62.24	61.14	61.05	63.16	62.26	60.15	61.78	61.5	63.61	64.21	62.41	63.02	62.41	62.41	63.91	66.97	67.02	68.37	63.09	63.24	63.69	62.78	66.82	67.12	65.91	66.52	67.12	66.52	68.78	68.78	68.33	67.87	72.77	67.02		75.34	73.24	71.74	72.5	72.66
44	P. azotifigens	51.89	66.42	66.42	65.36	63.91	63.46	66.17	64.81	64.51	64.81	63.76	65.11	65.26	63.76	64.21	65.86	64.96	66.77	64.21	66.32	64.96	64.01	64.36	67.02	67.22	67.07	62.99	62.69	63.6	62.54	70.5	70.65	69.44	71.26	69.14	68.99	70.35	70.65	70.35	69.29	72.53	66.92	75.34		83.23	77.59	78.05	76.98
45	P. urumqiensis	49.92	65.06	65.36	63.4	62.86	62.56	65.26	65.91	65.76	64.06	63.46	65.41	64.06	62.41	64.25	64.96	63.91	65.71	62.41	65.87	64.21	61.9	62.26	66.72	66.77	66.77	61.33	61.33	61.63	62.08	68.67	68.52	68.22	68.83	68.52	66.72	68.52	68.83	68.07	69.28	72.05	68.29	73.24	83.23		76.72	77.79	75.65
46	P. chloritidismutans	48.56	66.57	66.57	66.72	65.86	64.06	67.52	66.67	66.82	65.71	66.47	64.81	65.56	63.91	66.21	65.26	66.92	67.22	66.92	68.71	67.67	64.91	62.56	65.96	66.17	66.17	64.5	64.65	63.6	63.9	68.67	68.67	68.07	69.34	65.66	66.77	67.62	67.92	67.77	68.52	71.6	68.6	71.74	77.59	76.72		94.77	88.15
47	P. kunmingensis	49.77	67.77	67.47	66.11	67.07	64.66	66.92	65.76	65.76	65.86	65.86	64.96	65.26	64.36	66.52	66.17	66.62	67.82	67.37	68.86	67.52	65.36	62.11	66.27	66.62	66.92	63.9	64.05	64.35	64.65	68.37	68.37	67.47	68.58	65.96	66.16	67.32	67.62	67.17	70.03	72.05	68.29	72.5	78.05	77.79	94.77		88.15
48	P. perfectomarina	49.17	67.32	67.92	66.87	64.96	63.91	66.32	65.61	66.06	65.41	64.66	65.56	63.46	62.41	64.1	65.71	63.91	65.86	65.41	67.37	65.41	63.55	62.11	66.42	66.62	67.07	64.5	64.65	63.9	64.5	67.92	68.37	67.32	68.58	66.72	65.86	68.07	68.07	67.62	67.17	71.6	67.99	72.66	76.98	75.65	88.15	88.15
49	P. songnenensis	49.92	66.27	66.87	66.72	66.02	65.41	66.77	66.06	66.21	66.32	66.32	66.62	65.26	64.06	65.91	65.11	66.47	67.67	66.02	70.21	67.07	64.76	63.61	68.67	68.57	68.27	65.26	65.11	64.35	64.8	68.67	69.13	67.77	69.49	67.78	66.92	69.88	69.88	69.28	69.28	73.41	69.21	74.04	78.66	77.64	88.31	89.08	89.69
50	P. stutzeri	49.32	67.17	67.17	66.57	66.32	65.56	66.77	65.91	66.06	66.32	66.17	66.17	64.81	64.36	64.86	64.66	64.96	66.62	65.56	67.22	68.12	64.61	62.86	66.87	67.22	67.52	64.35	64.5	64.8	64.65	68.22	68.37	67.62	69.64	67.17	66.77	67.92	68.22	68.52	68.83	73.11	67.23	72.81	77.9	77.34	87.38	88	84.77
51	P. balearica	50.23	67.02	67.32	67.47	65.56	64.06	67.52	66.21	66.21	66.47	67.67	65.41	65.26	65.26	67.57	66.17	64.66	65.71	64.66	67.66	66.77	65.36	63.46	67.92	68.12	68.42	63.9	63.9	63.9	63.6	68.83	68.98	68.37	70.63	69.58	67.92	70.63	70.93	71.39	71.39	73.41	67.68	72.15	78	77.44	80.64	80.79	79.73
52	P. nosocomialis	50.38	67.92	68.07	67.47	66.02	65.41	67.97	66.21	66.37	65.26	66.32	67.22	65.86	63.91	66.37	65.11	66.92	68.42	66.62	70.51	69.02	66.77	66.32	68.07	68.12	68.42	65.11	65.11	65.41	64.05	71.08	71.23	70.78	70.63	68.22	67.92	71.23	71.54	70.63	71.99	75.83	68.89	73.52	78.76	79.57	82.16	82.01	80.34
53	P. kirkiae	48.64	63.25	63.86	63.55	64.81	62.56	64.21	64.05	64.05	63.76	63.76	63.91	61.35	61.5	63.14	61.65	63.46	64.36	64.21	66.17	66.32	65.81	62.71	64.32	64.67	66.32	63.7	63.7	65.06	63.55	66.27	66.72	66.27	66.92	65.51	65.26	67.92	67.92	67.47	65.07	70.68	67.07	73.62	75.11	74.7	79.17	79.48	79.33
54	P. nitrititolerans	49.47	67.62	67.92	66.87	66.17	64.51	65.56	67.12	67.27	66.32	66.92	66.92	64.96	63.91	67.57	64.81	65.11	66.92	64.21	67.51	66.62	64.31	64.06	64.91	65.26	66.47	63.75	63.75	63.14	62.54	67.32	67.77	66.11	68.22	65.21	65.36	69.58	69.58	69.88	69.73	74.17	68.75	73.27	76.98	78.1	82.85	83.15	81.32
55	P. xanthomarina	49.4	67.77	68.37	66.11	64.81	64.36	64.06	65.46	65.76	65.71	66.17	66.32	63.01	63.01	63.8	65.11	62.56	65.11	63.46	63.62	63.01	61.65	60.9	64.31	64.81	65.71	63.6	63.6	64.05	64.05	65.96	66.42	65.36	68.07	66.27	65.66	67.92	67.92	68.22	68.83	72.36	67.99	71.21	74.81	75.91	79.27	80.34	79.42
56	P. zhaodongensis	49.24	65.21	65.66	65.96	64.36	64.06	64.96	65.76	66.06	65.71	65.56	66.77	63.91	64.21	65.31	63.16	62.86	64.21	62.56	64.82	62.41	60.75	61.5	62.5	62.71	63.16	63.75	63.75	63.29	63.29	66.57	66.42	66.27	67.77	67.17	64.76	66.72	67.02	67.77	67.02	69.34	67.99	69.83	73.6	75.61	79.57	78.66	78.96
57	P. saudiphocaensis	48.87	66.42	66.72	64.76	64.36	62.26	64.51	64.71	64.71	64.81	66.92	67.52	65.11	63.91	63.5	65.11	63.76	64.36	64.06	64.97	64.96	63.7	61.8	65.96	66.17	66.77	64.65	64.65	64.95	63.9	66.57	66.72	65.81	68.22	66.27	65.21	68.07	68.37	69.13	67.62	72.21	69.05	73.24	75	75.96	79.02	78.71	78.87
58	P. kuykendallii	52.67	67.18	67.48	66.56	64.94	64.18	65.09	66.62	66.77	64.48	66.31	64.94	66.31	64.33	67.68	66.46	63.79	63.48	63.03	64.22	63.14	60.42	66.16	68.5	68.13	69.65	64.18	64.18	63.11	63.72	71.52	71.52	71.69	69.85	69.7	69.09	69.65	69.95	70.71	70.3	71.62	66.31	70.17	72.99	72.53	69.2	68.74	68.59
59	P. thermotolerans	53.36	67.02	67.02	65.05	64.95	63.75	63.44	65.56	65.71	62.82	62.84	64.65	63.9	61.33	64.35	64.65	63.9	65.11	64.2	65.87	64.65	64.34	63.29	69.76	68.88	69.34	66.51	66.21	66.06	66.06	72.34	72.19	72.04	72.34	72.04	70.97	73.29	73.6	72.23	73.1	75.91	65.71	72.62	73.07	71.1	71.26	71.86	71.1
60	P. chengduensis	54.36	66.87	66.87	66.72	65.4	66.77	66.77	66.16	66.01	64.63	67.37	66.92	66.77	64.64	68.29	65.55	64.5	64.65	63.6	65.72	66.16	64.65	64.95	73.01	72.87	72.1	69.11	69.11	68.65	66.97	73.93	74.08	73.01	76.07	76.38	74.23	77.03	77.34	77.64	75.46	74.89	66.16	72.77	71.17	68.88	69.79	69.94	69.94
61	P. toyotomiensis	54.67	67.48	67.48	67.63	66.16	67.22	66.62	66.77	66.62	64.48	67.07	66.92	66.92	64.49	68.44	65.86	64.8	65.11	63.9	66.02	66.77	64.65	64.95	73.31	73.17	72.41	69.11	69.11	68.35	66.97	74.69	74.85	73.77	76.53	76.53	74.54	77.49	77.79	78.1	76.07	75.65	66.46	73.07	71.47	69.34	70.54	70.69	70.69
62	P. sihuisensis	54.36	67.33	67.33	66.87	66.46	66.92	66.62	66.92	66.77	64.33	67.07	67.22	67.22	65.1	68.74	66.16	64.65	64.65	64.05	66.02	66.92	64.95	65.1	73.31	73.17	72.41	69.72	69.72	68.81	67.28	74.54	74.69	73.62	76.38	76.69	74.54	77.49	77.79	78.1	76.23	75.96	66.92	72.92	71.47	69.18	70.54	70.69	70.69
63	P. chaetoceroseae	55.28	67.02	67.02	66.87	66.31	66.92	66.77	67.22	67.07	65.4	67.07	66.46	67.22	64.8	68.44	66.16	65.26	64.8	63.75	65.72	66.92	64.95	64.95	73.16	72.71	72.26	69.57	69.57	67.89	67.28	75	75.15	74.08	76.23	76.53	74.85	77.18	77.49	77.79	75.77	75.8	66.62	72.77	71.62	68.88	70.85	70.39	71
64	P. alcaliphila	54.06	67.02	67.02	67.02	66.16	66.92	66.31	67.07	66.92	64.18	67.83	66.31	66.77	64.64	68.44	65.55	64.95	64.65	63.44	66.17	67.37	64.65	65.71	73.31	73.17	72.1	69.27	69.27	68.5	67.13	74.23	74.39	73.31	76.53	77.45	74.39	77.18	77.49	77.79	75.92	75.34	67.23	73.07	71.17	68.58	70.39	69.94	69.94
65	P. guguanensis	55.13	68.09	68.24	68.09	67.07	67.22	66.92	67.83	67.68	65.09	67.98	67.37	67.07	64.8	67.68	66.16	65.71	65.41	64.35	66.02	67.82	64.5	65.55	74.23	74.09	73.93	69.42	69.42	68.96	67.59	75	75.15	74.69	76.69	77.3	75.92	78.25	78.56	78.71	76.69	76.26	67.23	72.47	71.93	69.79	71.15	70.69	70.24
66	P. mendocina	54.82	67.63	67.78	67.78	66.77	67.37	66.92	67.53	67.37	64.02	67.68	66.92	67.07	64.49	68.29	66.16	65.26	65.11	63.9	65.87	67.82	65.26	64.8	74.39	74.24	73.78	69.42	69.42	68.5	67.59	75.15	75.31	74.54	76.84	76.99	75.92	78.41	78.71	78.56	76.84	76.11	66.92	72.31	71.78	69.49	71.45	70.69	71
67	P. hydrolytica	54.36	67.17	67.02	67.17	66.46	66.77	66.62	67.53	67.37	65.4	66.77	66.77	66.62	64.04	67.22	65.71	64.95	64.95	64.2	65.87	67.98	64.65	65.55	74.23	74.09	73.32	69.21	69.21	67.99	66.77	75.15	75.31	74.69	76.69	76.84	75.15	78.56	78.87	78.03	76.07	76.42	66.16	72.62	71.78	69.64	70.85	70.39	70.09
68	P. composti	52.99	67.33	67.63	66.11	66.31	66.62	66.46	66.01	65.86	64.63	66.77	66.31	66.01	63.88	66.46	65.25	64.95	63.6	64.35	64.97	65.86	63.29	63.28	72.24	72.1	71.19	68.96	68.96	68.04	67.13	73.62	74.08	72.85	75.77	75.15	74.23	76.88	76.57	77.34	74.69	74.58	66.21	72.49	70.62	68.03	70	69.85	69.7
69	P. khazarica	54.67	67.33	67.33	67.48	65.71	67.68	67.98	67.37	67.22	65.09	66.46	67.07	67.83	65.4	68.59	66.77	66.01	66.47	64.05	67.66	66.92	64.5	65.25	73.62	73.48	73.17	67.58	67.58	67.28	66.67	74.54	74.69	74.23	75.92	76.23	74.54	76.88	77.18	77.34	76.07	75.96	67.07	72.92	71.78	70.39	70.09	70.09	70.09
70	P. oleovorans	53.91	65.96	66.11	66.26	65.25	66.62	66.46	65.4	65.4	64.18	65.71	65.86	65.55	64.64	67.07	65.25	64.2	64.5	62.84	65.12	66.62	64.35	63.58	72.24	71.8	71.65	70.18	69.88	69.42	67.28	73.16	73.31	72.55	74.85	75.15	73.16	76.57	76.88	76.72	74.69	73.81	66.77	71.41	69.95	67.52	69.94	69.94	70.09
71	P. pseudoalcaligenes subsp.	53.75	65.81	65.96	66.11	65.1	66.46	66.31	65.25	65.25	64.02	65.55	65.71	65.4	64.49	66.92	65.1	64.05	64.35	62.69	64.97	66.47	64.2	63.43	72.09	71.65	71.49	70.03	69.72	69.27	67.13	73.01	73.16	72.39	74.69	75	73.01	76.42	76.72	76.57	74.54	73.66	66.77	71.26	69.95	67.37	69.79	69.79	69.94
72	P. indoloxydans	53.75	65.2	65.35	65.65	64.91	65.97	66.31	65.21	65.21	63.99	65.36	65.67	65.36	64.15	67.03	65.52	63.6	63.9	62.65	64.82	66.31	63.86	63.39	71.78	71.34	71.19	69.57	69.27	68.81	67.13	72.85	73.01	72.24	74.69	74.69	72.85	76.26	76.57	76.42	74.39	73.66	66.31	70.95	69.8	67.37	69.49	69.79	69.79
73	P. sediminis	54.67	66.72	67.02	67.02	65.1	65.71	65.25	66.16	66.01	66.01	67.07	66.62	66.31	64.95	66.92	65.55	64.5	64.2	64.05	65.42	66.92	64.8	64.49	72.7	72.56	72.26	67.58	67.58	66.67	65.9	73.01	73.47	72.09	75	76.38	74.08	75.65	75.65	76.11	75	74.12	65.55	72.01	71.02	68.58	68.73	67.98	69.03
74	P. lalkuanensis	52.91	64.75	64.75	64.15	64.09	65.3	65.71	66.52	66.82	64.99	66.36	66.52	66.21	64.09	65.32	65	63.75	65.86	66.21	65.12	65.56	63.72	64.19	70.21	69.79	70.54	63.58	63.58	64.19	63.58	75.99	75.99	75.99	75.53	74.47	72.8	76.18	76.48	74.77	75.99	78.81	65.86	70.35	72.77	72.16	70.95	71.1	71.41
75	P. resinovorans	53.21	63.99	63.99	63.54	63.6	64.05	65.56	65.71	66.01	62.82	67.37	66.62	65.86	64.5	65.41	65.56	63.14	65.11	64.8	66.62	66.47	63.28	64.65	70.36	69.94	71.45	66.51	66.51	67.12	64.54	74.32	74.62	74.01	75.68	74.47	73.25	76.63	76.93	76.02	75.38	78.51	66.92	71.26	72.16	72.01	70.8	70.35	71.56
76	P. furukawaii	51.99	63.39	63.24	63.24	64.35	64.05	66.31	66.31	66.47	63.28	64.95	64.05	64.39	64.39	66.06	64.95	64.5	66.16	65.56	66.92	68.43	66.01	64.2	69.76	69.34	70.54	67.73	67.73	66.51	64.69	73.71	74.01	73.25	75.68	73.56	71.73	75.42	75.72	75.11	75.99	77.13	65.55	69.14	71.1	69.89	70.5	69.59	68.99
77	P. otitidis	52.14	64.15	63.99	63.69	62.99	64.35	64.65	66.26	66.26	63.28	64.95	65.41	65.11	62.54	65.51	65.41	64.35	66.01	65.41	66.02	67.37	64.8	64.05	70.36	69.94	71.15	66.16	66.16	66.16	67.07	75.99	76.29	75.84	76.14	74.47	72.19	76.02	76.33	76.33	76.9	79.12	66.77	71.32	73.22	72.99	72.69	72.84	72.53
78	P. mangiferae	50	65.2	65.36	63.69	64.24	64.55	63.14	64.7	64.85	63.17	64.55	65.91	63.79	63.18	64.55	63.48	65.26	66.62	64.85	68.11	66.92	65.4	64.34	70.21	69.79	70.09	67.43	67.12	67.28	65.6	72.64	72.49	72.19	74.32	73.71	70.52	75.27	75.57	75.42	75.84	76.98	65.71	72.08	72.84	73.29	71.02	71.17	70.56
79	P. flexibilis	51.38	64.9	64.9	65.05	62.54	62.54	61.33	61.18	61.33	61	61.33	60.88	60.27	59.52	61.93	60.88	60.88	62.24	59.82	63.77	63.14	61.76	63.44	68.39	67.82	68.13	63.93	63.93	63.62	61.64	71.58	71.58	71.12	70.82	73.1	71.43	73.44	73.75	72.84	73.1	75	62.06	67.47	69.59	67.47	66.57	66.72	67.17
80	P. tuomuerensis	50.92	64.15	64.15	64.3	62.24	62.39	61.18	61.18	61.33	61	61.18	60.42	59.97	59.06	61.48	60.73	60.73	61.78	59.37	63.02	62.54	61.15	63.75	67.78	67.22	67.52	64.54	64.54	64.54	61.8	70.97	70.97	70.36	71.12	72.49	70.97	73.14	73.44	72.69	72.19	74.54	61.46	67.78	68.99	66.26	66.11	65.81	67.02
81	P. fluvialis	53.36	62.63	62.93	62.63	62.39	61.48	61.63	64.05	64.35	62.82	61.48	63.14	61.63	62.24	64.35	64.35	62.08	62.99	62.39	64.67	63.9	60.24	63.75	67.17	67.22	67.52	64.73	64.58	63.51	60.92	73.86	74.47	73.56	72.3	74.32	71.84	73.29	73.29	72.38	73.1	74.7	63.21	68.55	70.36	68.84	66.11	66.87	67.33
82	P. pharmacofabricae	53.21	62.78	63.09	63.09	62.39	61.33	61.78	63.75	64.05	62.82	62.39	63.29	62.08	62.54	64.65	64.5	62.69	63.6	62.69	64.97	64.2	60.55	63.9	67.33	67.22	67.67	64.58	64.43	64.12	61.07	74.32	74.92	74.01	72.6	74.62	72.3	73.29	73.29	72.38	73.4	74.85	64.12	68.09	70.21	69	66.26	67.02	67.17
83	P. alcaligenes	55.37	67.02	67.02	66.26	66.77	67.07	67.23	66.77	66.92	64.17	65.4	66.62	67.38	65.4	66.92	68.75	63.75	65.26	62.99	65.72	66.92	63.9	65.4	72.73	72.43	72.89	67.28	67.28	67.13	67.33	77.08	77.23	76.85	76.77	73.77	73.69	76.5	76.8	76.19	75.61	78.71	65.4	70.95	72.08	71.6	70.09	70.24	70.24
84	Azotobacter beijerinckii	51.98	63.99	63.99	62.93	63.75	63.75	64.05	64.95	64.95	61.76	61.63	63.44	63.29	61.63	63.14	65.56	64.95	66.92	65.56	68.41	69.34	63.75	65.86	70.93	70.8	70.05	67.58	67.73	66.51	65.55	73.06	73.21	72.75	71.99	72.15	70.47	70.82	71.12	70.21	70.62	75.91	62.82	70.65	70.54	69.18	70.85	71.3	70.54
85	Azotobacter chroococcum	52.13	66.26	66.26	64.9	65.86	65.41	64.95	66.62	66.62	62.67	62.54	64.2	64.2	62.08	63.75	65.56	66.16	67.37	66.01	67.22	70.09	64.8	66.31	69.3	69.18	68.58	66.82	66.82	66.97	64.69	71.88	72.19	71.43	70.82	71.73	69.6	71.62	71.93	71.47	71.88	76.52	64.95	71.26	70.85	68.88	71.75	71.9	72.51
86	P. guangdongensis	52.44	62.93	63.24	62.03	63.58	62.37	65.11	67.07	67.07	64.48	62.97	62.97	65.1	61.46	65.25	66.16	64.5	65.56	64.8	63.77	67.22	66.01	64.64	70.52	70.24	71	65.6	65.6	65.14	64.08	71.12	71.43	71.88	71.12	71.73	70.36	72.84	73.14	72.69	70.82	73.32	63.28	71.56	70.09	67.37	68.58	68.43	66.62
87	P. oryzae	52.44	65.66	65.96	66.11	63.75	62.99	64.65	65.86	65.56	64.49	65.56	64.35	65.76	63.03	66.06	65.56	66.16	66.92	65.86	66.77	66.92	65.11	64.35	72.49	72.51	72.36	65.3	64.99	66.67	65.91	73.56	73.86	74.01	74.32	72.49	70.97	75.11	75.42	74.81	72.49	74.24	63.58	68.99	72.05	69.18	70.69	70.69	69.49
88	P. linyingensis	52.29	62.78	62.63	62.48	61.63	62.24	64.5	63.75	63.75	63.13	65.41	64.2	64.05	61.18	65.71	62.99	63.14	63.75	63.14	64.22	64.35	62.39	62.99	69.6	69.34	69.79	64.23	63.93	64.69	64.23	70.21	70.36	71.12	69.91	71.58	69.76	72.84	73.14	72.38	70.97	73.17	64.49	69.44	71.15	68.73	69.64	69.34	69.03
89	P. sagittaria	52.13	63.09	62.93	62.48	61.63	62.08	65.26	64.05	64.05	63.43	64.05	63.6	63.9	61.48	65.11	63.6	63.75	63.9	63.14	63.77	64.05	62.08	61.63	70.36	69.79	70.24	65.75	65.45	64.23	64.23	70.52	70.67	71.12	70.52	71.58	70.67	73.14	73.44	72.53	71.12	73.02	65.4	68.53	70.85	68.88	68.73	68.13	67.98
90	P. argentinensis	50.69	64.58	64.89	64.12	64.02	64.18	66.92	66.46	66.62	64.18	67.38	66.62	66.92	64.63	66.31	65.85	64.65	64.2	63.44	64.07	64.35	61.72	64.04	69.68	69.1	68.8	66.62	66.62	66.01	66.77	69.65	69.8	68.8	71.47	71.02	70.41	71.12	71.12	71.28	71.78	73.9	66.77	72.66	71	69.94	70.09	69.79	70.09
91	P. punonensis	50.53	62.9	63.21	63.66	64.02	62.65	66.16	64.33	64.48	64.48	67.07	66.62	67.23	65.7	65.4	65.09	63.14	63.6	62.39	64.67	64.65	62.93	62.67	67.99	67.43	67.58	66.46	66.46	66.31	66.62	68.44	68.59	67.88	70.11	70.56	69.65	69.91	69.91	70.21	70.86	73.14	66.77	71.9	69.34	69.18	69.64	69.64	71
92	P. straminea	50.99	63.97	64.27	63.51	64.02	64.02	66.46	65.09	65.24	65.85	66.92	66.62	66.77	64.33	67.07	64.94	64.05	65.11	63.6	65.27	64.5	62.78	62.06	70.14	69.56	69.41	66.31	66.31	65.85	66.16	69.8	69.95	68.95	71.17	71.47	70.26	71.43	71.73	71.58	71.93	73.75	66.92	73.26	70.09	70.24	71.3	71.3	71.75
93	P. daroniae	52.82	63.82	63.82	63.51	63.72	63.72	67.23	65.4	65.85	65.55	67.07	65.4	65.7	65.7	65.09	64.94	62.99	62.69	62.54	64.67	64.05	61.72	62.06	69.22	68.49	68.49	67.23	67.38	67.23	67.08	69.2	69.35	68.95	71.17	69.5	70.26	69.91	70.21	69.76	71.02	73.9	66.77	71.6	70.09	69.79	69.49	68.88	71.3
94	P. dryadis	52.37	64.43	64.73	64.43	65.24	64.18	68.9	65.4	65.7	64.63	67.07	65.55	66.01	65.4	66.01	66.62	64.05	64.5	63.9	65.57	65.26	63.69	63.88	71.06	70.47	69.86	68.14	68.29	67.53	66.77	71.32	71.47	70.93	72.53	71.93	71.47	70.97	71.28	71.12	72.69	74.81	67.98	73.41	72.05	71.3	71.9	71.3	72.66
95	P. flavescens	52.67	63.97	64.27	62.9	63.87	64.33	66.46	65.24	65.24	63.57	66.46	65.24	64.94	64.02	65.55	65.24	62.99	63.29	62.84	64.82	63.6	62.18	62.67	69.53	69.41	68.65	68.45	68.6	67.53	66.16	69.8	69.95	68.95	71.47	69.95	68.74	70.06	70.36	70.36	71.78	73.9	68.13	71.45	70.39	68.73	70.24	69.94	71.6
96	P. seleniipraecipitans	51.91	63.97	63.97	63.82	62.96	62.8	66.46	65.09	65.4	65.4	65.55	66.31	65.55	63.87	65.85	64.33	62.54	64.2	62.39	62.87	64.35	62.03	63.73	67.23	66.51	67.58	65.85	65.85	65.7	65.54	67.68	67.83	67.43	69.04	69.35	69.5	68.54	68.84	69.3	69.2	72.84	65.56	72.05	70.24	68.88	67.67	67.52	69.34
97	P. anguilliseptica	49.62	61.22	61.37	60	61.74	59.3	63.11	62.8	62.96	62.96	63.57	62.96	63.41	62.04	63.87	61.74	61.48	61.33	60.12	61.38	62.24	58.55	60.09	64.32	64.23	64.08	63.72	63.72	62.65	60.95	67.07	67.07	66.36	65.1	67.53	67.07	66.72	66.57	67.63	68.13	67.98	63.9	68.58	65.26	65.26	65.56	65.26	66.01
98	P. peli	51.91	61.07	61.53	60	62.04	59.3	64.02	63.72	63.87	62.8	64.79	62.96	65.55	62.96	64.63	63.41	62.69	61.63	61.93	61.68	61.93	59	59.33	65.54	65.75	64.69	64.94	64.94	63.26	60.95	66.77	66.77	66.21	67.07	67.83	66.77	67.33	67.17	67.93	69.04	68.29	64.35	68.73	66.01	65.86	65.56	66.62	65.11
99	P. guineae	50.53	61.53	61.98	61.37	61.43	60.67	64.18	63.57	63.87	64.48	65.55	61.28	61.74	61.89	63.57	62.04	59.67	59.37	59.37	59.43	59.97	57.94	59.03	63.25	63.01	62.1	62.8	62.8	61.13	60.49	63.88	64.19	63.32	64.34	65.86	64.95	64.59	64.59	65.35	65.55	65.55	64.8	67.22	64.8	65.56	63.75	62.99	64.95
100	P. leptonychotis	50.69	62.75	62.9	61.53	60.98	61.59	64.63	64.63	65.09	63.87	64.33	64.79	66.16	63.57	65.09	64.18	61.78	61.18	60.88	62.87	62.24	60.21	59.33	66.16	65.91	65.75	64.33	64.33	64.18	62.48	66.62	66.62	66.21	66.77	67.37	67.68	67.33	67.48	68.69	69.35	68.89	63.44	67.98	65.11	65.86	65.71	65.71	65.86
101	P. cuatrocienegasensis	51.76	64.43	64.89	64.27	62.35	61.89	66.31	63.57	63.72	64.79	65.7	67.53	66.01	64.48	63.87	66.01	62.39	62.24	62.54	63.62	63.9	60.67	60.7	69.07	68.65	69.25	67.38	67.38	66.62	65.39	68.89	68.89	69.1	70.56	70.26	69.2	70.36	70.52	70.67	71.78	72.23	65.11	69.49	69.64	69.79	68.43	69.03	69.18
102	P. marincola	50.38	62.9	63.05	62.9	60.37	60.82	65.09	63.57	63.87	63.87	63.57	65.4	67.23	66.01	65.24	63.41	61.78	62.54	60.88	60.18	62.08	59.3	61.61	62.33	61.95	62.4	63.26	63.26	62.8	63.86	64.8	64.64	64.54	65.1	65.55	63.88	64.59	64.59	65.65	66.01	68.29	64.05	66.92	64.2	66.31	64.8	64.8	66.01
103	P. segetis	52.52	64.12	64.43	63.36	61.13	60.37	66.46	64.18	64.33	65.09	64.33	66.01	65.09	62.96	62.8	64.94	62.08	61.33	60.73	62.28	61.78	58.85	62.06	65.39	65.3	66.06	65.55	65.7	64.79	65.24	66.31	65.86	66.06	67.07	69.2	66.16	67.02	67.33	67.93	69.04	69.5	65.71	67.67	67.22	68.13	66.16	66.62	68.13
104	P. benzenivorans	53.28	67.63	67.33	66.56	67.38	65.7	68.45	66.31	66.31	64.33	66.46	65.4	68.45	66.31	68.14	66.77	66.77	66.62	64.35	67.07	66.31	63.69	64.8	71.52	70.93	70.47	65.85	65.55	64.63	62.79	72.53	72.69	71.69	72.53	71.62	71.78	71.73	72.04	71.58	73.75	74.05	66.77	72.36	72.51	71.6	71.75	72.05	69.79
105	P. borbori	53.28	65.5	65.8	64.27	65.55	63.72	66.01	66.01	66.16	65.24	64.79	64.63	66.01	64.48	67.07	64.94	63.29	63.9	63.29	65.42	64.5	61.27	62.52	67.99	67.88	67.88	66.46	66.16	65.09	63.25	69.35	69.8	68.8	69.65	69.35	68.74	70.82	70.82	70.97	71.17	73.14	64.65	70.54	69.79	69.49	68.58	69.79	69.34
106	P. taeanensis	52.45	62.75	63.05	62.75	63.26	62.5	63.72	63.41	63.41	64.02	66.01	63.72	66.01	62.96	64.63	63.57	62.99	62.99	62.84	63.17	62.99	60.91	62.22	67.53	67.28	67.58	63.26	63.26	62.2	62.33	68.59	68.74	68.95	69.1	69.97	67.43	69.3	69.45	70.67	69.04	70.26	63.75	68.65	66.92	68.13	67.23	67.68	67.38
107	P. massiliensis	52.67	64.43	64.73	63.66	65.39	65.24	64.02	64.01	64.17	62.94	63.09	66	64.01	62.94	64.62	65.08	65.26	67.37	64.64	65.72	62.99	63.53	66.77	69.62	69.2	69.2	66.16	65.85	66.92	66.31	68.38	68.53	68.44	70.2	69.14	66.72	71.36	71.67	71.36	69.74	72.53	63.29	72.21	72.36	70.54	69.18	70.39	69.18
108	P. typographi	51.76	64.12	64.43	63.51	63.4	64.78	62.65	63.09	63.55	62.79	62.63	63.4	63.71	60.8	63.4	64.32	63.14	64.8	62.82	64.67	63.29	63.68	64.02	67.48	67.68	68.13	66.62	66.62	65.85	64.02	66.41	66.87	66.46	67.47	66.87	65.96	69.24	69.24	69.39	66.26	71.47	59.61	70.41	69.14	68.84	66.72	67.47	66.57
109	P. turukhanskensis	54.5	65.34	65.95	65.65	65.09	65.55	63.57	63.41	63.72	64.02	62.5	65.7	64.94	64.94	64.63	64.48	61.93	62.84	62.84	61.23	63.6	62.03	62.97	67.53	67.73	67.43	65.4	65.55	63.87	65.39	68.13	68.59	67.58	69.5	69.35	70.71	71.28	70.97	70.21	71.32	71.62	63.6	71.15	70.09	69.18	69.18	69.79	69.49
110	P. matsuisoli	51.3	64.27	64.73	66.11	63.57	62.5	63.72	63.26	63.41	62.5	63.87	63.72	66.31	62.96	65.09	65.7	63.75	64.65	64.2	64.22	63.14	61.18	63.73	67.94	67.83	67.68	65.24	65.4	65.7	63.57	67.32	67.62	67.53	69.44	68.23	67.32	71.36	71.67	71.21	69.89	71.62	62.39	67.37	68.73	68.28	69.79	69.79	69.34
111	P. coleopterorum	51.45	65.95	66.41	65.04	65.54	64.47	64.18	62.94	62.94	64.62	62.79	65.7	64.01	62.48	64.62	64.62	63.44	64.2	63.43	64.97	65.11	64.29	63.41	68.55	67.98	68.29	67.68	67.38	66.77	65.85	69.44	69.89	69.65	70.8	70.65	69.74	70.61	70.61	71.21	70.8	73.29	59.91	69.65	68.68	68.53	67.47	68.08	67.47
112	P. rhizosphaerae	50.53	64.58	65.04	63.97	63.55	62.94	63.72	62.48	62.48	63.86	61.56	64.47	62.63	61.1	63.4	64.17	62.99	62.69	61.15	63.92	64.8	63.07	62.8	67.48	67.22	67.53	65.85	65.85	65.09	64.48	68.38	68.84	68.89	69.74	70.05	68.23	69.39	69.39	70	69.14	72.38	59.3	70.11	67.47	68.23	66.41	66.26	67.02
113	P. baltica	49.92	65.5	65.65	65.19	65.08	64.47	64.33	63.55	63.55	63.86	63.25	66.16	63.86	61.87	64.34	63.55	64.2	64.5	63.43	64.07	64.8	63.53	64.33	67.79	67.68	67.53	66.57	66.57	65.81	63.83	70.2	70.35	70.11	70.5	70.2	69.14	70.76	71.06	71.06	70.2	72.99	60.36	71.93	67.93	68.08	66.57	66.72	67.17
114	P. akappagea	50.69	62.75	62.6	63.51	61.56	62.94	63.41	60.8	60.64	61.41	61.41	63.25	63.86	61.56	63.4	63.86	62.08	61.93	61.15	64.22	63.44	62.16	63.87	67.69	67.43	66.97	66.16	66.16	66.01	64.58	69.5	69.2	69.1	69.8	69.35	69.5	68.54	68.84	68.69	70.26	70.86	59.82	67.07	66.62	67.07	66.77	66.77	65.71
115	P. brassicae	49.31	64.73	65.04	65.04	64.02	64.48	64.63	62.5	62.2	63.41	62.04	63.72	63.26	60.37	64.33	62.96	63.75	64.05	63.14	64.22	63.9	62.93	63.28	67.79	67.22	66.77	66.62	66.62	66.77	65.09	67.62	67.32	67.98	66.72	67.32	68.23	69.09	69.39	68.18	68.99	72.38	61.33	70.69	67.82	68.13	67.98	67.37	67.37
116	P. qingdaonensis	50.84	65.5	65.8	65.65	64.79	64.33	65.4	63.57	63.26	63.41	62.5	65.09	64.02	61.28	64.48	62.5	64.95	63.9	63.29	64.82	63.75	62.93	64.95	68.55	68.29	67.83	66.92	66.92	67.07	65.7	67.78	67.78	68.13	67.78	67.93	67.32	68.94	69.24	68.94	69.89	73.14	62.08	71.15	67.52	67.82	68.58	68.73	67.67
117	P. defluvii	51.15	63.82	63.51	62.44	64.33	64.02	62.04	63.25	63.25	61.59	61.74	63.72	62.8	60.98	63.73	63.57	62.99	63.75	62.39	65.12	63.9	61.72	61.76	66.87	66.46	65.71	65.65	65.65	65.65	64.29	65.36	65.36	66.16	66.11	65.81	65.36	67.42	67.42	65.97	68.84	71.78	61.15	68.59	67.07	67.58	66.67	67.73	67.73
118	P. laurentiana	51.15	63.66	63.66	63.36	63.87	63.26	62.96	63.86	63.86	62.2	62.04	64.48	62.8	60.67	64.01	63.41	63.44	63.29	63.44	65.57	64.8	62.63	61.61	66.11	65.71	65.71	67.07	67.07	65.85	64.33	65.51	65.51	66.16	67.17	65.36	65.51	67.27	67.27	66.82	68.38	71.32	60.24	68.44	66.92	66.52	67.73	67.58	67.88
119	P. huaxiensis	52.82	62.9	63.36	62.29	63.26	63.26	60.98	62.33	62.17	61.28	60.82	65.4	62.2	60.37	63.55	64.02	62.39	62.84	62.08	64.07	64.2	63.39	62.67	66.72	66.46	66.31	66.62	66.62	66.62	64.79	66.87	67.17	67.37	67.17	67.32	66.87	68.48	68.48	68.94	68.23	71.78	61.76	70.41	67.98	67.27	66.67	67.88	65.91
120	P. japonica	52.82	64.43	64.43	64.27	65.85	65.4	63.72	63.4	63.55	61.59	62.35	64.02	64.18	60.98	64.17	64.33	64.05	64.05	63.44	67.07	66.16	63.99	62.37	69.92	69.5	68.89	66.46	66.16	66.31	64.63	68.84	68.53	69.35	68.84	67.47	68.84	69.85	70.15	68.94	72.62	75.11	61	69.5	68.43	67.12	68.33	69.24	67.12
121	P. alkylphenolica	51.3	61.68	62.14	61.68	61.41	61.26	60.98	60.49	60.34	60.03	58.19	60.95	60.49	58.65	59.88	58.81	61.33	59.37	59.18	61.98	60.57	60.49	62.8	63.05	62.52	62.82	63.57	63.41	62.8	60.52	63.39	63.54	63.73	63.24	64.15	63.09	63.64	63.64	64.09	62.93	66.01	61.18	66.01	64.35	64.2	63.44	63.44	63.9
122	P. hutmensis	49.77	63.97	64.43	63.36	61.87	62.94	60.98	59.57	59.42	59.72	60.03	62.17	60.49	58.19	60.34	59.57	62.39	61.93	61.15	64.07	62.39	62.16	62.65	64.73	64.34	64.8	63.11	63.11	63.41	61.43	64.9	65.2	65.4	64.9	65.81	63.84	66.36	66.36	65.45	64.9	67.22	61.48	68.13	64.8	65.41	64.2	64.5	64.5
123	P. donghuensis	50.69	63.66	64.12	63.82	61.72	62.33	61.28	59.42	59.42	59.88	60.49	62.33	60.95	58.96	60.18	60.34	60.88	60.88	60.7	63.92	64.2	61.55	63.41	64.12	63.58	64.64	62.8	62.65	62.2	60.98	66.26	65.96	66.92	65.81	66.41	65.36	65.91	65.91	65.3	65.96	69.04	61.78	66.62	64.95	65.86	65.41	64.35	64.35
124	P. tructae	51.6	64.89	65.04	63.66	62.48	62.33	62.2	60.8	60.8	60.8	61.41	63.09	61.72	58.65	60.95	61.72	62.24	61.33	61.61	63.77	64.8	62.16	64.33	64.58	64.04	64.95	62.5	62.35	62.04	61.13	66.26	66.26	66.16	65.36	65.81	65.2	66.06	66.06	65.76	66.57	68.89	60.73	67.07	66.01	65.26	66.16	65.86	66.47
125	P. vranovensis	51.45	62.6	63.05	63.51	60.64	60.8	61.43	59.57	59.57	60.8	59.42	61.87	60.49	58.65	60.8	60.18	61.03	60.73	61.15	63.32	64.5	62.01	61.74	63.05	62.52	63.13	62.2	62.04	61.43	60.06	64.6	64.3	65.4	64.3	65.05	65.2	65.61	65.3	64.39	65.36	67.83	60.73	66.47	65.86	65.26	65.86	65.26	65.26
126	P. wadenswillerensis	50.23	63.36	63.82	63.36	61.26	61.72	62.35	59.57	59.42	60.18	59.57	62.63	60.49	58.5	59.42	60.49	61.63	60.73	61.76	64.07	63.14	62.46	62.65	63.51	62.97	64.04	63.41	63.41	62.35	61.74	65.66	65.66	66.01	65.36	66.11	65.51	65.3	65.3	64.24	65.51	68.59	62.54	67.37	64.95	65.86	65.26	64.2	64.65
127	P. cremoricolorata	49.62	62.44	62.44	62.75	61.28	61.59	63.11	62.2	61.89	61.89	59.15	62.8	62.35	58.99	64.18	62.35	64.05	64.35	61.93	64.22	63.9	63.99	63.73	67.79	66.92	67.23	62.8	62.65	62.65	61.41	67.02	66.72	66.92	66.41	67.63	68.24	66.82	67.12	65.91	67.02	69.35	60.88	67.07	65.41	65.26	65.56	65.41	64.05
128	P. reidholzensis	50.53	64.27	64.27	63.66	62.79	63.86	63.11	62.17	61.72	60.95	59.42	62.79	63.25	59.26	61.26	63.09	63.14	62.84	61	62.57	63.44	63.07	62.96	65.19	65.25	65.25	62.96	62.8	62.96	61.89	66.72	66.41	66.92	65.96	66.72	66.72	67.27	67.58	67.73	66.57	68.59	60.42	66.16	66.77	65.71	64.8	64.35	64.95
129	P. urmiensis	50.84	63.05	63.05	62.9	62.48	63.55	62.04	62.02	61.87	59.88	60.03	62.48	61.41	58.35	60.95	61.72	61.63	61.48	60.09	62.28	62.54	62.46	62.04	65.5	65.4	65.25	62.8	62.65	62.8	62.35	66.41	66.11	66.46	65.66	66.57	66.11	67.12	67.42	66.97	65.81	68.74	60.12	65.26	66.92	66.92	64.2	64.35	64.8
130	P. shirazensis	49.92	62.9	62.9	61.98	62.79	62.33	61.59	61.26	60.8	60.18	60.64	62.02	61.26	58.04	62.17	61.72	62.39	62.39	61.31	63.17	63.6	62.01	61.43	64.12	64.04	64.19	62.2	62.2	61.59	60.98	64.15	64.15	64.04	65.05	66.26	64.9	65	65	64.85	65.05	67.22	61.33	65.26	66.16	66.77	64.05	64.35	62.84
131	P. farsensis	50.84	61.68	61.53	62.14	60.34	60.95	61.43	62.48	62.17	61.1	59.88	62.02	62.79	58.35	60.8	60.64	63.14	61.78	61.76	61.83	62.24	63.83	62.35	66.92	66.21	66.06	63.26	63.11	62.96	60.31	65.4	65.4	65.91	64.49	66.01	67.07	65.35	65.35	65.65	65.1	68.44	62.08	66.31	65.41	64.95	65.71	64.35	65.26
132	P. taiwanensis	50.53	62.75	62.75	62.14	61.26	62.48	61.89	63.25	62.94	62.02	59.57	62.48	62.17	59.88	63.25	62.79	61.78	62.08	62.37	63.32	62.84	62.31	62.2	67.18	67.22	65.4	64.94	64.79	64.33	63.87	65.36	65.36	65.55	65.2	68.53	66.87	66.52	66.82	66.06	67.32	69.5	62.08	67.52	67.67	67.52	66.16	66.01	66.16
133	P. plecoglossicida	49.16	62.14	62.14	61.22	60.95	62.17	60.67	60.49	60.49	58.35	58.5	61.41	61.26	59.26	61.1	61.1	61.03	62.39	61	64.07	62.08	61.25	62.04	66.72	66.46	65.86	62.96	62.8	62.2	62.35	66.41	66.41	66.62	67.17	68.38	66.72	67.58	67.88	66.36	67.17	68.29	60.57	65.56	66.62	67.67	67.22	67.22	67.07
134	P. entomophila	50.08	63.05	63.05	62.75	62.48	63.4	63.57	61.56	61.56	60.34	59.72	61.72	62.17	60.64	62.79	62.17	65.11	64.65	63.88	65.12	63.44	63.37	64.48	66.87	66.46	66.16	63.26	63.11	62.04	61.28	68.08	67.78	67.53	67.32	66.87	67.02	66.82	67.12	65.91	66.41	68.29	62.08	66.16	68.13	68.28	67.37	67.22	67.07
135	P. peradeniyensis	50.69	63.21	63.21	62.44	63.25	62.48	62.8	61.41	61.1	60.64	59.57	61.87	62.79	60.18	62.94	62.33	64.2	64.2	63.43	64.22	64.5	64.44	64.33	67.18	66.77	66.01	63.26	63.11	61.89	61.89	67.78	67.47	67.37	67.02	67.78	67.78	67.12	67.42	66.82	66.87	69.2	61.93	67.37	68.88	67.67	67.37	67.37	67.22
136	P. sichuanensis	49.77	63.21	63.21	61.83	61.87	62.48	62.5	61.26	61.26	59.42	59.57	61.72	62.17	59.72	62.02	61.41	63.14	64.05	61.61	64.97	63.9	63.07	64.02	66.56	66.31	65.4	64.02	63.87	62.96	61.59	66.87	66.57	66.46	66.87	66.72	66.41	66.21	66.52	66.36	67.02	68.44	62.39	66.31	67.52	67.52	67.07	66.77	67.07
137	P. mosselii	51.45	63.66	63.66	63.66	62.02	63.4	62.96	61.26	61.26	61.26	60.18	63.09	63.4	61.26	63.86	62.02	64.05	64.8	64.19	65.72	63.29	64.59	64.94	66.41	66.01	64.34	63.72	63.57	63.11	62.96	67.47	67.47	67.53	66.41	67.32	67.32	67.58	67.88	66.36	67.78	69.65	62.08	66.62	69.34	68.58	67.07	67.07	67.52
138	P. xantholysinigenes	52.21	64.12	64.12	63.51	62.48	62.63	63.72	62.02	62.02	61.41	60.34	62.63	63.25	60.34	64.32	61.72	63.9	63.6	63.73	64.67	64.95	64.59	64.94	67.94	67.22	66.62	63.26	63.11	62.8	61.74	68.99	68.99	69.2	68.23	68.68	69.29	68.03	68.03	66.52	67.78	69.04	62.69	68.28	69.03	68.73	67.22	67.37	67.22
139	P. muyukensis	51.91	63.82	63.82	63.36	61.87	63.25	63.11	61.56	61.56	61.56	60.34	62.94	62.63	60.18	63.71	62.79	62.99	63.29	63.28	65.12	64.05	64.44	63.87	67.33	66.92	66.01	63.11	62.96	62.65	62.04	68.84	68.53	68.44	68.23	68.23	68.38	67.88	68.18	66.36	68.08	69.8	62.08	67.07	68.58	68.58	66.31	66.31	66.31
140	P. soli	51.76	62.75	62.75	63.21	60.64	62.48	62.5	60.34	60.34	60.8	59.88	63.71	62.79	60.03	62.02	60.8	63.14	63.75	62.22	65.27	61.63	63.22	62.5	66.41	66.01	65.55	61.13	60.98	61.74	60.52	66.57	66.57	67.07	65.96	66.87	67.17	65.76	66.06	65	67.02	68.29	60.88	66.16	67.22	68.73	65.71	65.86	66.01
141	P. maumuensis	51.3	63.51	63.21	63.05	61.1	62.33	62.2	60.95	60.95	60.64	60.49	62.17	61.41	60.18	62.33	61.72	62.69	63.29	61.76	64.52	62.24	63.22	63.26	67.02	66.62	65.71	61.43	61.28	61.89	61.28	66.57	66.26	66.31	65.81	67.78	67.62	66.06	66.36	65.3	67.62	69.04	60.73	66.31	68.13	67.52	65.86	66.01	65.26
142	P. fakoensis	50.69	63.05	62.9	62.9	60.18	61.41	61.89	60.03	60.03	60.95	59.72	62.48	61.41	58.96	61.41	61.26	61.78	61.93	60.24	63.17	62.99	63.22	62.65	66.72	66.46	65.86	63.87	63.72	63.26	62.04	66.26	66.26	67.22	67.17	67.62	68.38	67.58	67.88	66.82	67.62	70.11	60.57	65.86	68.58	67.22	66.16	65.41	65.86
143	P. xanthosomae	51.15	62.9	62.44	62.75	59.72	61.26	61.43	60.34	60.34	60.8	60.03	62.48	61.72	59.26	62.02	61.72	61.78	61.33	60.55	62.87	62.84	63.37	61.59	67.33	67.07	66.01	62.96	62.8	62.2	62.35	66.26	66.11	66.92	67.02	67.62	67.78	67.73	68.03	66.82	68.08	69.8	60.88	65.41	67.52	66.92	66.01	65.86	65.56
144	P. vlassakiae	50.99	61.83	61.68	61.37	60.49	61.1	61.28	60.95	60.34	61.56	59.42	63.09	61.1	58.5	60.49	61.56	60.73	61.18	60.55	61.68	62.54	61.55	61.74	66.41	66.16	65.4	63.57	63.41	62.5	61.89	66.72	66.41	67.07	67.47	67.93	68.68	68.03	68.03	67.27	65.2	70.56	60.57	67.67	68.28	66.92	64.8	64.5	65.86
145	P. hunanensis	50.08	63.51	63.36	62.14	61.56	62.02	61.43	60.49	60.18	60.34	60.49	62.33	61.56	59.11	60.55	62.02	61.63	61.03	60.39	62.43	62.08	61.7	60.67	66.72	66.16	65.4	63.37	63.22	62.92	62.31	66.41	66.11	67.22	67.17	67.62	68.84	67.73	68.03	66.12	67.02	70.71	61.33	66.01	66.92	66.77	66.62	66.77	67.37
146	P. promysalinigenes	49.16	61.68	61.53	60.31	60.95	60.03	60.21	60.03	59.72	59.72	58.35	62.17	60.49	57.27	59.88	60.64	60.12	59.82	59.64	62.13	61.78	61.85	61.89	63.82	63.58	63.58	62.2	62.04	61.43	60.52	65.2	64.9	65.25	65.86	66.11	66.01	66.36	66.36	66.36	64.15	69.35	58.91	66.46	65.56	65.86	65.4	65.4	64.64
147	P. capeferrum	49.01	62.14	62.29	61.37	60.49	61.41	60.06	60.34	60.03	58.19	58.96	61.41	60.8	57.89	61.87	60.64	60.57	60.88	60.09	62.57	61.18	60.64	62.8	64.73	64.64	63.73	62.35	62.35	61.74	60.82	65.36	65.05	65.25	65.66	65.96	66.72	65.91	66.21	64.85	64.6	67.37	60.27	65.26	65.56	65.11	65.41	64.8	64.35
148	P. kermanshahensis	48.85	61.98	61.98	60.61	60.49	61.26	59.91	60.64	60.34	58.81	58.65	60.95	61.1	57.58	62.02	59.26	60.57	60.57	59.03	61.83	61.93	60.64	62.65	64.43	64.04	63.73	62.35	62.2	62.2	60.37	64.45	64.45	64.49	65.05	65.81	65.51	65.15	65.45	65.76	63.84	67.07	60.12	65.41	64.5	65.11	64.05	63.29	63.14
149	P. guariconensis	52.21	62.9	62.75	62.44	60.67	61.74	63.41	62.5	62.5	60.98	60.82	64.18	63.26	59.76	62.35	61.28	64.35	64.65	62.54	65.12	64.05	63.09	64.64	68.4	67.98	66.77	64.79	64.79	65.24	62.35	67.93	67.78	67.98	67.62	65.81	67.62	68.79	69.09	67.58	68.53	70.26	61.93	70.54	69.03	66.62	67.82	67.98	67.82
150	P. wayambapalatensis	51.6	62.75	62.6	61.98	62.2	62.35	62.5	60.52	60.52	60.37	59.76	62.96	62.65	60.21	63.26	62.5	62.99	63.29	62.69	65.57	64.2	61.42	63.88	66.87	66.46	66.01	63.57	63.57	62.8	60.98	67.47	67.47	68.29	67.93	67.62	68.84	69.85	70.15	68.94	68.23	70.56	61.93	69.64	69.18	67.22	68.58	68.13	68.28
151	P. monteilii	51.76	63.21	63.05	61.98	61.72	62.48	62.35	61.1	60.8	59.26	59.72	61.87	60.8	58.96	61.72	60.64	61.93	63.44	61.31	63.62	61.93	61.7	63.41	66.26	66.01	65.71	63.57	63.41	63.57	62.5	66.72	66.72	67.22	67.32	67.32	68.53	68.48	68.79	67.12	66.72	69.65	62.54	67.52	67.67	66.77	67.82	67.52	67.07
152	P. kurunegalensis	51.45	63.21	63.05	62.29	61.87	62.17	62.35	61.26	60.95	59.57	59.57	61.56	60.95	58.65	62.02	60.95	62.24	63.14	60.85	62.87	61.63	61.55	63.57	66.26	66.01	65.71	64.48	64.33	63.41	62.2	66.87	66.87	67.22	67.17	67.62	68.38	68.64	68.94	67.42	66.41	69.8	61.78	66.62	67.07	66.62	67.07	66.92	67.07
153	P. alloputida	50.08	62.14	61.98	61.22	61.26	61.1	60.82	60.95	60.64	59.72	59.57	61.87	61.26	59.57	60.95	60.49	61.33	62.08	61.15	62.43	61.18	61.55	62.5	64.43	64.19	63.58	64.48	64.33	63.41	62.35	66.11	65.81	66.92	66.72	65.81	67.47	67.27	67.58	66.67	65.05	69.8	62.39	66.92	66.77	65.41	66.31	66.01	66.77
154	P. asiatica	50.99	62.44	62.29	62.14	62.79	62.79	62.5	61.56	61.26	59.11	59.88	63.4	63.71	60.64	63.4	63.09	63.29	64.5	63.28	64.67	63.14	62.61	64.48	66.87	66.46	65.71	65.09	64.94	64.02	62.04	66.41	66.41	66.62	67.17	67.78	67.62	67.58	67.88	66.52	66.57	70.11	61.63	66.62	67.98	66.47	68.13	67.82	67.22
155	P. pyomelaminifaciens	50.99	62.44	62.29	62.14	62.79	62.79	62.5	61.56	61.26	59.11	59.88	63.4	63.71	60.64	63.4	63.09	63.29	64.5	63.28	64.67	63.14	62.61	64.48	66.87	66.46	65.71	65.09	64.94	64.02	62.04	66.41	66.41	66.62	67.17	67.78	67.62	67.58	67.88	66.52	66.57	70.11	61.63	66.62	67.98	66.47	68.13	67.82	67.22
156	P. shirazica	50.99	62.29	62.14	62.29	62.63	62.63	62.35	61.41	61.1	58.96	59.72	63.55	63.55	60.49	63.25	62.94	63.14	64.5	63.28	64.67	62.99	62.61	64.48	66.87	66.46	65.71	64.94	64.79	63.87	61.89	66.26	66.26	66.46	67.17	67.62	67.62	67.42	67.73	66.36	66.41	70.11	61.48	66.62	67.82	66.31	68.28	67.67	67.07
157	P. inefficax	51.3	62.29	62.14	62.29	62.02	62.63	62.35	62.17	61.87	59.88	60.03	63.25	62.63	60.18	62.94	62.48	62.69	63.9	62.22	63.62	62.24	62.77	64.02	66.56	66.31	65.4	64.18	64.02	62.5	61.13	66.87	66.87	67.07	66.41	67.32	67.32	67.42	67.73	66.36	66.57	70.41	61.93	66.92	68.43	66.77	69.03	68.58	68.73
158	P. persica	52.06	62.75	62.29	62.44	62.79	62.63	62.65	61.41	61.1	59.72	60.34	63.25	62.79	61.1	63.09	61.87	62.84	63.6	62.06	63.17	61.78	62.46	64.02	65.95	65.71	65.4	64.48	64.33	62.2	61.89	67.17	67.17	67.83	67.32	67.17	67.47	67.88	68.18	66.52	66.72	70.26	62.24	67.37	69.03	68.13	68.28	68.43	67.67
159	P. anuradhapurensis	51.91	63.97	63.82	63.51	62.94	62.48	64.48	62.94	62.63	61.72	60.64	64.01	63.71	60.8	63.25	62.79	62.84	64.2	62.22	63.92	62.84	63.53	65.24	66.87	66.46	66.01	65.24	65.09	64.02	62.35	67.62	67.62	68.44	67.78	68.53	68.99	67.88	68.18	66.21	66.57	70.71	62.54	67.52	69.64	67.52	68.73	68.13	68.43
160	P. oryzicola	52.52	64.12	63.97	63.66	62.94	62.63	64.33	62.94	62.94	61.26	60.49	64.47	63.86	61.41	63.55	63.55	63.14	64.5	62.97	63.92	62.99	63.53	65.55	67.02	66.62	66.16	65.09	64.94	64.18	62.65	67.62	67.62	68.29	67.78	68.38	68.84	68.03	68.33	66.36	67.02	70.71	62.84	67.98	69.64	67.67	68.88	68.28	67.98
161	P. putida	50.08	61.53	61.68	61.07	59.72	60.8	60.67	61.41	61.1	59.72	59.57	61.87	61.72	58.81	61.56	60.95	61.18	62.39	61	62.43	62.54	62.01	62.65	66.56	66.31	65.25	63.87	63.72	62.35	60.67	66.26	66.26	66.92	66.87	66.87	67.62	68.18	68.48	66.97	66.26	69.04	61.18	66.77	66.77	66.62	66.62	65.71	66.62
162	P. juntendi	50.38	62.75	62.29	61.83	61.26	62.02	60.52	60.95	60.64	58.81	58.81	61.41	60.64	58.5	61.72	61.72	62.08	61.93	61.61	62.87	62.24	62.16	62.8	65.04	64.64	63.43	62.8	62.65	61.74	60.52	66.57	66.26	66.46	67.32	66.26	67.32	66.21	66.52	65	65.51	67.83	60.57	65.26	67.37	65.71	66.92	65.71	65.56
163	P. fulva	50.23	60.76	60.61	60.31	58.81	60.18	61.74	60.49	60.49	60.03	59.57	61.1	61.1	59.57	61.56	61.26	61.63	60.57	61	61.83	62.08	60.03	61.89	65.04	64.64	64.64	63.72	63.41	61.74	60.21	65.05	65.05	65.71	66.16	66.41	68.89	67.12	67.42	67.27	66.11	68.44	61.78	66.62	67.67	66.31	67.07	66.16	65.71
164	P. parafulva	51.45	63.36	63.21	62.75	62.63	62.17	61.43	61.72	61.41	60.34	58.96	62.48	62.79	60.64	64.32	63.09	62.39	63.9	62.67	64.67	63.75	62.92	63.26	64.73	64.49	64.34	64.02	63.87	62.35	62.04	67.17	67.17	66.92	68.44	67.78	67.98	67.88	68.18	67.58	65.81	69.35	61.48	66.62	68.13	67.07	67.83	67.68	67.22
165	P. asplenii	51.45	65.95	66.26	66.26	63.41	64.79	64.79	64.02	64.18	62.96	62.5	64.94	65.4	62.8	65.24	64.63	63.75	64.05	62.54	64.52	64.65	62.24	65.1	68.15	67.73	67.88	64.94	64.94	65.4	64.22	71.32	71.32	71.69	71.49	73.17	71.34	70.97	71.28	70.21	70.26	73.75	60.57	71.65	69.18	69.64	66.77	67.53	67.37
166	P. fuscovaginae	51.3	65.95	66.26	66.26	63.26	64.48	64.63	64.33	64.48	62.65	62.5	64.94	64.94	62.5	65.4	64.33	63.75	64.05	62.54	64.52	64.8	62.39	64.8	67.99	67.58	67.43	64.63	64.63	65.24	64.07	71.47	71.47	71.84	71.34	72.87	71.04	70.82	71.12	70.36	70.11	73.44	60.57	71.34	68.73	69.49	66.92	67.37	67.22
167	P. vanderleydeniana	52.82	67.79	67.48	67.18	65.09	66.46	65.7	64.48	64.79	62.96	64.48	65.09	66.46	64.02	65.7	66.01	65.56	65.71	65.86	64.97	65.26	64.5	65.1	70.44	70.02	69.41	66.46	66.46	65.85	66.36	72.53	72.84	72.15	72.56	73.21	72.26	72.04	72.34	71.28	72.53	73.44	61.63	70.56	69.34	68.28	66.82	68.33	67.58
168	P. agarici	54.81	65.95	65.65	65.19	62.8	63.11	63.72	62.2	62.5	63.11	62.2	64.33	64.33	61.59	62.8	64.18	62.39	63.14	62.99	63.17	64.35	61.93	62.97	68.56	68.45	67.68	64.18	64.18	64.18	64.01	69.15	69.15	69.05	69.16	70.12	70.23	70.17	70.32	70.62	68.84	71.78	60.73	70.11	67.98	66.47	66.21	66.52	66.36
169	P. batumici	54.35	66.56	66.87	66.72	64.63	64.02	65.85	63.41	63.57	62.04	62.65	63.72	64.18	60.98	63.11	64.02	64.2	64.2	63.44	63.77	65.11	62.84	65.4	69.94	69.82	71.19	65.7	65.7	65.4	65.08	72.64	72.64	72.56	71.6	72.1	70.99	71.69	71.99	71.08	70.82	73.9	60.73	70.56	69.34	68.28	67.42	68.33	68.18
170	P. aestus	54.05	67.02	67.02	66.87	63.87	65.24	65.09	64.48	64.63	62.96	63.72	64.33	65.09	62.35	64.35	63.87	63.14	63.75	62.84	64.82	63.6	62.84	65.4	69.02	68.6	68.75	65.2	64.89	64.89	65.04	70.97	70.97	71.04	70.53	73.02	71.45	71.54	71.84	71.08	70.82	74.36	60.27	69.65	67.82	69.03	66.82	67.42	67.27
171	P. sessilinigenes	51.91	65.95	66.26	65.65	62.96	63.41	64.94	62.2	62.5	61.89	62.8	62.5	64.79	63.11	63.26	64.33	63.44	63.6	63.75	63.32	63.44	61.63	64.04	67.94	67.53	66.92	64.48	64.48	64.63	64.47	70.36	70.36	70.88	70.84	70.43	70.84	70.17	70.47	70.17	69.45	72.99	60.42	70.26	68.43	67.82	67.73	67.58	68.03
172	P. protegens	52.21	66.41	66.11	65.04	64.02	63.72	63.57	62.04	62.2	61.43	62.2	63.11	65.09	63.72	62.8	64.18	63.14	63.6	64.35	63.32	63.14	62.54	63.28	68.1	67.68	67.07	64.18	64.18	63.87	64.17	70.06	70.06	70.73	69.62	70.12	70.69	70.47	70.78	70.02	70.21	73.14	60.42	69.95	67.67	68.88	66.21	66.82	66.36
173	P. saponiphila	52.29	65.27	64.96	65.27	62.58	63.34	63.19	62.2	62.35	62.42	62.73	62.5	64.25	63.49	61.81	64.1	62.76	63.22	63.52	62.65	63.22	61.56	63.73	67.71	67.45	66.39	64.86	64.86	63.64	62.71	68.92	69.53	69.74	69.24	70.66	70.31	69.48	69.48	69.18	69.53	72.76	59.97	69.27	67.75	68.43	66.14	66.74	65.98
174	P. chlororaphis subsp. aurantiaca	53.28	65.65	65.65	65.65	62.2	61.74	63.87	61.89	62.04	62.2	62.8	63.11	62.8	61.43	62.04	64.48	60.57	61.48	62.69	60.78	61.48	61.93	62.52	68.1	67.84	67.84	63.72	63.72	62.8	64.17	69.45	69.45	69.21	68.85	69.36	69.47	68.95	69.25	68.65	67.93	71.32	60.12	68.44	67.52	67.82	65	66.21	66.97
175	P. chlororaphis subsp. aureofaciens	52.98	66.56	66.56	66.26	63.11	62.65	63.87	62.04	62.2	62.35	62.8	62.96	63.26	61.89	62.35	64.33	61.18	61.93	63.14	61.38	61.93	62.08	62.22	68.56	68.29	68.14	63.87	63.87	62.8	64.78	70.06	70.06	69.82	69.01	69.66	69.92	69.25	69.56	68.95	68.24	71.93	61.03	68.89	67.52	67.98	65.61	66.52	67.27
176	P. chlororaphis subsp. chlororaphis	52.98	66.56	66.56	66.26	62.8	62.35	64.63	62.2	62.35	62.2	63.11	62.5	63.26	61.43	61.89	64.48	61.03	61.48	63.29	61.23	61.18	61.63	62.22	68.71	68.6	68.29	64.02	64.02	62.96	64.17	69.6	69.6	69.51	68.7	69.36	69.31	69.25	69.56	68.95	68.39	72.23	60.27	68.44	66.92	68.43	65.61	66.82	66.21
177	P. chlororaphis subsp. piscium	52.67	66.26	66.26	65.8	62.2	61.59	64.33	62.35	62.5	62.5	62.65	62.65	62.8	60.98	61.89	64.02	60.73	61.63	62.69	61.08	61.03	61.93	62.52	67.94	67.68	67.68	63.72	63.72	62.5	64.17	69.76	69.76	69.51	68.7	69.36	69.31	68.8	69.1	68.65	67.48	71.93	60.42	69.2	67.37	68.58	65.61	66.21	66.82
178	P. kielensis	52.82	63.51	63.82	63.82	61.59	62.35	63.11	63.41	63.72	62.65	62.2	64.63	62.8	60.21	62.08	63.72	62.08	62.84	62.24	61.53	62.24	61.93	62.22	68.1	68.29	67.68	64.44	64.44	63.98	64.73	68.69	69	69.36	68.09	70.27	70.08	69.56	69.56	68.52	69.15	72.53	59.37	70.26	66.62	67.98	67.12	67.42	67.12
179	P. iraniensis	53.13	63.66	63.66	63.51	62.35	60.82	63.57	63.72	63.87	61.59	62.35	63.72	64.18	61.43	61.89	64.02	62.08	62.08	63.75	61.68	62.84	61.48	62.82	66.72	66.77	66.16	64.63	64.63	63.72	63.86	68.39	68.39	68.75	68.55	70.12	69.77	69.56	69.56	70.02	67.78	71.93	62.08	68.74	67.37	68.28	66.82	66.67	66.36
180	P. siliginis	53.28	63.66	63.36	63.51	62.04	61.43	63.41	63.41	63.57	61.43	62.04	63.11	63.87	61.13	61.89	64.02	62.24	62.54	63.6	61.68	63.29	62.39	62.22	66.56	66.77	66.62	65.24	65.24	63.41	62.94	68.69	68.69	69.05	68.24	69.82	70.08	69.25	69.25	69.71	67.48	72.23	61.48	69.8	67.37	68.13	66.97	66.52	66.67
181	P. atacamensis	53.44	64.73	64.73	64.73	63.11	62.04	64.18	64.48	64.63	62.04	62.96	64.02	64.63	61.59	62.65	64.48	63.14	62.99	64.05	62.28	62.84	62.08	62.82	67.64	67.84	66.62	65.55	65.55	64.02	63.86	69	69	69.21	69.01	70.58	70.53	70.47	70.47	70.62	68.84	73.14	61.93	70.56	68.58	68.88	67.73	67.88	67.42
182	P. khorasanensis	54.2	64.12	64.12	64.43	62.8	62.04	64.02	64.79	64.94	61.74	62.65	63.87	64.63	61.13	62.8	64.48	63.14	62.08	63.75	61.68	62.54	62.24	62.37	67.33	67.53	67.38	64.63	64.63	63.11	62.63	68.54	68.54	68.9	68.09	70.12	69.92	70.17	70.17	70.17	68.54	72.53	61.18	70.26	68.28	68.73	66.97	67.12	67.58
183	P. triticicola	54.05	63.82	63.82	63.82	62.2	61.13	63.72	64.33	64.48	61.13	62.35	63.41	63.87	60.98	62.35	63.87	62.39	61.78	63.29	61.68	61.93	62.08	62.37	67.02	67.07	66.92	64.48	64.48	63.41	62.94	69.15	68.84	69.21	68.24	69.66	70.08	69.25	69.25	70.02	67.63	72.08	61.78	69.35	67.52	68.88	66.97	66.82	66.36
184	P. moraviensis	53.28	64.43	64.43	64.73	63.11	62.04	63.11	64.79	64.94	62.2	63.26	63.72	64.79	62.04	62.5	64.02	63.29	62.54	63.6	62.28	62.08	62.24	62.37	67.64	67.84	67.07	64.79	64.79	63.26	63.4	69	69	69.36	68.55	70.73	70.53	70.32	70.32	70.78	68.54	72.84	61.33	69.8	68.13	69.03	66.52	66.67	66.97
185	P. hamedanensis	53.74	65.04	65.04	64.89	62.5	62.04	63.87	64.63	64.79	61.74	62.35	62.96	63.72	61.74	62.65	63.72	63.29	62.39	63.44	62.28	62.69	62.03	62.52	67.33	67.53	67.07	64.63	64.63	63.57	62.63	68.84	68.84	69.97	67.78	69.91	69.91	69.56	69.56	69.86	67.63	72.53	61.18	69.49	67.52	68.88	66.47	66.16	66.16
186	P. granadensis	53.13	63.97	63.97	63.66	62.2	61.43	64.02	63.87	64.02	61.74	62.5	64.18	64.18	61.28	61.74	64.94	61.93	62.08	63.9	61.83	62.69	61.63	62.22	67.02	67.07	66.77	64.94	64.94	64.33	63.4	69.6	69.6	70.12	68.24	70.27	70.53	69.41	69.41	69.56	67.63	71.93	61.18	68.59	67.22	67.67	67.42	68.03	67.27
187	P. crudilactis	53.59	63.51	63.51	63.97	62.35	61.13	62.5	62.8	62.96	61.43	62.5	62.2	63.26	59.91	60.52	63.41	60.88	60.12	62.08	60.63	62.08	61.72	61.15	65.18	65.55	65.55	64.94	64.94	64.48	63.55	66.72	66.72	67.68	66.41	68.9	69.16	67.73	67.73	68.04	66.57	70.41	60.73	69.04	66.31	66.01	66.21	66.52	65.91
188	P. tensinigenes	53.59	63.82	63.82	64.58	62.8	61.28	63.26	62.8	62.96	61.74	62.2	62.8	63.11	60.67	61.13	63.26	61.03	60.57	61.63	60.93	61.78	61.72	61.15	65.64	65.55	65.55	65.55	65.24	64.33	63.71	66.72	66.72	67.99	66.56	68.45	69.62	68.34	68.34	68.49	66.72	70.26	59.82	68.59	66.62	66.47	65.91	66.52	65.61
189	P. neuropathica	53.13	63.51	63.51	63.97	62.35	61.43	63.26	63.57	63.72	61.13	62.35	62.65	63.87	60.67	61.28	63.26	61.63	60.42	62.69	61.53	62.24	62.03	61.31	66.1	66.16	65.85	64.94	64.94	64.02	63.55	67.17	67.17	68.29	67.48	69.66	69.62	69.25	69.25	69.1	67.63	70.71	60.12	68.13	66.31	66.31	65.91	66.52	66.06
190	P. zeae	53.13	63.66	63.66	64.12	62.35	61.59	63.41	63.72	63.87	60.82	62.2	62.5	64.02	60.98	61.43	63.41	61.78	60.42	62.84	61.68	62.39	61.88	61.46	66.26	66.31	66.01	64.94	64.94	64.02	63.25	67.17	67.17	68.29	67.48	69.36	69.47	69.1	69.1	68.95	67.48	70.56	60.12	68.13	66.16	66.31	65.91	66.52	65.91
191	P. helmanticensis	52.98	63.51	63.51	63.82	61.89	60.82	62.96	62.5	62.65	61.74	62.2	62.65	62.96	60.52	60.98	63.26	61.33	60.88	62.08	60.93	61.18	60.82	60.39	65.8	66.01	66.01	64.02	64.02	63.41	62.94	67.02	67.02	67.99	66.41	69.05	69.01	67.88	67.88	68.34	65.96	69.95	59.82	68.13	66.16	67.37	65.15	65.61	65.76
192	P. koreensis	52.67	63.97	63.66	64.12	61.74	61.43	62.04	63.11	63.26	62.2	61.43	63.26	62.96	61.13	60.52	62.8	61.33	61.63	63.44	60.78	61.48	61.63	60.85	65.95	66.16	65.09	64.63	64.63	62.04	64.17	67.33	67.33	67.84	67.94	68.6	68.24	69.1	69.1	68.65	67.63	70.86	60.73	68.13	66.01	67.22	65.3	66.36	65.76
193	P. monsensis	53.89	63.66	63.66	63.82	62.5	61.74	63.87	63.41	63.57	62.2	62.04	63.72	64.18	61.89	61.43	62.96	61.93	62.08	63.29	61.38	61.93	62.08	61.15	67.02	67.23	66.31	64.63	64.63	62.8	63.55	68.39	68.39	69.36	68.55	69.51	69.62	69.25	69.25	68.8	67.63	71.47	61.03	68.89	66.92	67.37	65.76	66.67	66.21
194	P. atagosis	52.21	63.36	63.36	63.82	62.35	61.74	63.26	63.41	63.57	61.59	63.11	62.5	63.57	61.28	61.28	62.35	62.39	61.93	62.08	61.38	61.78	61.93	61.61	66.41	66.62	65.85	64.33	64.33	63.41	62.63	68.55	68.55	69.68	68.4	69.68	69.94	69.42	69.42	69.57	68.55	72.26	61.46	68.89	66.92	66.92	65.91	66.82	66.67
195	P. baetica	54.66	64.43	64.43	64.27	63.87	62.35	63.87	63.72	63.87	62.2	63.57	63.87	63.57	61.43	61.74	64.18	61.93	62.99	62.69	62.13	62.24	62.08	62.37	67.02	67.23	67.23	64.63	64.63	63.41	63.71	67.78	68.09	68.6	69.31	69.66	69.62	69.1	69.1	69.56	68.69	71.47	61.63	69.8	67.52	67.82	66.21	67.12	66.52
196	P. glycinae	52.98	64.27	64.12	64.58	62.04	62.2	63.72	62.5	62.65	61.59	63.41	63.57	63.72	61.43	62.65	63.26	61.33	62.84	61.78	61.98	62.69	61.33	62.06	66.72	66.62	66.01	64.79	64.79	64.33	63.55	67.78	68.09	68.9	68.09	69.97	69.77	69.71	69.71	68.95	68.84	71.93	60.27	67.98	66.01	67.52	65.3	66.06	65.61
197	P. kribbensis	53.44	65.04	65.04	64.73	63.41	63.26	64.02	64.02	64.18	60.82	62.8	64.02	64.79	61.89	61.89	63.57	62.54	62.24	62.39	61.98	62.24	62.24	62.52	67.79	67.99	67.68	64.79	64.79	64.18	63.09	69.45	69.45	69.97	68.24	70.58	70.38	70.32	70.32	69.71	68.69	72.53	61.03	70.11	66.92	68.28	66.06	66.52	66.21
198	P. bananamidigenes	52.52	63.82	63.82	64.27	60.67	61.13	64.18	63.26	63.41	60.82	61.59	63.11	64.18	61.43	62.04	63.41	63.29	62.39	62.24	61.38	61.78	61.63	62.22	66.1	65.7	65.55	64.48	64.18	64.18	65.08	69	68.69	69.05	67.63	69.51	68.55	68.04	68.34	68.19	68.24	71.32	59.97	69.2	66.62	66.62	65.61	65.45	65.61
199	P. botevensis	53.13	64.27	63.97	64.27	62.2	62.65	63.26	63.72	63.87	61.89	62.35	62.96	63.26	61.74	62.96	63.87	61.78	62.99	62.69	62.43	63.29	61.03	63.13	67.33	66.92	66.92	65.55	65.24	64.79	64.47	68.39	68.09	68.9	67.94	69.51	70.38	69.1	69.41	69.41	69	72.69	60.88	69.2	67.07	67.67	65.91	66.97	67.27
200	P. ekonensis	52.67	65.8	65.65	65.19	65.09	64.63	64.63	63.41	63.72	62.65	62.96	64.79	65.4	62.5	64.33	64.48	63.6	64.2	64.05	63.32	64.05	62.24	64.64	69.63	69.66	68.14	63.87	63.87	64.18	65.08	69.3	69.6	69.97	70.69	69.97	69.01	70.78	71.08	70.78	70.52	74.66	61.63	70.41	69.03	68.58	68.64	69.7	68.18
201	P. brassicacearum	52.98	64.43	64.73	64.73	62.8	63.41	64.18	63.26	63.41	62.04	62.96	65.09	65.4	61.43	63.26	64.33	62.08	62.99	62.54	62.72	63.29	62.69	63.58	67.48	67.68	66.31	63.87	63.87	63.41	64.01	69.15	68.84	69.21	69.92	70.58	70.23	69.86	70.17	70.47	69.45	72.23	61.33	69.2	67.98	68.58	67.42	66.67	66.52
202	P. kilonensis	52.82	64.27	64.58	64.73	62.96	63.26	64.48	63.72	63.87	62.2	62.35	65.09	65.4	61.74	62.8	64.18	62.39	62.39	62.24	62.28	62.84	62.99	63.88	67.79	67.84	66.46	63.41	63.41	63.26	63.25	69	69	69.05	69.47	70.43	69.77	70.62	70.93	70.93	69.76	71.78	61.03	69.5	67.52	68.58	66.97	66.36	65.61
203	P. bijieensis	53.28	64.89	65.19	65.5	62.5	62.65	64.79	64.18	64.33	61.43	63.11	65.24	64.63	60.98	63.44	63.72	62.24	62.39	62.84	61.83	62.84	62.54	62.97	67.02	67.23	65.7	63.68	63.68	63.53	63.51	68.84	69.15	68.75	69.77	69.21	69.77	70.02	70.32	70.03	68.84	71.47	61.18	69.2	67.37	68.13	67.73	66.36	66.82
204	P. zarinae	53.89	65.04	65.04	65.04	63.87	63.41	65.24	65.24	65.4	62.04	62.96	65.7	65.24	62.2	63.57	65.09	61.63	62.69	63.44	62.57	62.99	63.44	63.88	68.4	68.75	67.38	64.48	64.48	64.18	64.78	69.45	69.76	69.51	70.53	70.88	70.53	70.93	71.23	71.54	70.52	72.84	61.33	69.95	68.13	68.58	67.58	67.73	66.36
205	P. viciae	52.21	64.12	64.43	65.8	61.43	62.65	64.18	64.48	64.79	62.5	62.8	65.4	64.02	61.28	63.44	63.57	61.48	62.08	62.08	62.87	63.29	62.69	62.67	67.48	67.84	66.92	63.53	63.53	63.53	63.36	69	69	68.9	69.47	70.43	69.16	70.17	70.47	69.88	68.84	71.17	59.37	68.13	66.77	68.13	67.27	66.67	66.06
206	P. thivervalensis	52.98	65.34	65.65	65.95	62.8	63.11	65.4	63.87	64.02	62.8	63.11	65.85	64.79	62.04	63.87	64.94	62.08	62.69	62.54	63.17	64.5	62.99	63.58	67.94	68.29	67.38	64.63	64.63	63.41	64.17	69.3	69	69.66	70.08	70.88	70.53	70.47	70.78	71.84	69.45	72.84	61.48	70.41	68.28	69.34	66.67	66.67	66.82
207	P. zanjanensis	52.82	64.89	65.19	64.89	61.89	62.8	63.87	63.57	63.72	62.2	62.8	65.24	64.94	61.43	64.63	64.48	61.63	62.08	62.54	62.87	63.75	62.08	63.28	67.48	67.53	66.92	64.79	64.79	64.33	64.17	69.45	69.15	69.82	69.77	70.88	69.77	70.32	70.62	71.54	69.6	72.38	61.78	69.65	67.67	69.03	67.58	66.67	66.21
208	P. tehranensis	53.89	64.89	64.89	66.11	62.65	63.11	64.02	63.87	64.18	63.11	63.26	65.24	65.09	62.2	64.18	65.09	61.18	61.33	62.69	62.57	63.29	62.39	62.52	67.48	67.84	66.92	64.18	64.18	63.72	63.71	69.15	68.84	69.21	69.47	70.58	69.31	70.17	70.47	71.39	68.69	71.02	60.73	68.89	68.13	68.43	67.27	67.27	66.67
209	P. alvandae	53.13	65.19	65.5	65.5	63.57	63.72	64.48	63.11	63.26	62.5	63.41	65.09	65.4	62.2	63.26	64.94	61.33	62.39	62.24	63.77	62.69	62.84	63.73	68.1	68.29	67.53	65.24	65.24	65.09	66	69.76	69.76	70.12	71.3	72.1	70.84	71.99	72.3	72.75	70.67	72.53	59.52	69.35	69.18	68.28	67.12	67.12	66.82
210	P. marvdashtae	52.52	64.27	64.58	64.73	62.5	63.26	65.24	64.63	64.94	61.59	62.8	64.63	64.94	60.98	63.11	64.63	62.08	62.24	63.14	63.17	62.99	62.08	63.58	68.71	68.14	67.23	63.72	63.72	63.57	64.01	69.6	69.91	69.82	70.84	70.58	69.92	71.54	71.54	72.15	69.6	72.69	61.48	69.65	68.58	69.79	67.12	66.82	67.12
211	P. corrugata	52.82	66.41	66.41	66.87	63.57	63.87	65.24	64.02	64.02	62.8	62.5	63.57	65.24	62.2	64.18	64.63	62.08	63.6	62.69	64.37	64.35	63.29	64.34	69.33	69.05	68.45	65.24	64.94	65.55	65.39	69.91	69.91	69.97	70.08	71.34	70.38	71.54	71.84	71.99	69.76	72.53	60.42	69.65	68.58	68.43	67.88	67.42	67.12
212	P. mediterranea	52.67	65.19	65.5	66.41	63.57	63.57	65.7	64.48	64.63	62.96	62.8	64.02	64.18	62.04	64.48	64.48	62.54	63.29	62.69	64.52	64.35	63.44	64.64	69.48	69.21	68.29	64.33	64.02	64.94	64.01	69.3	69.3	69.36	70.23	71.95	70.08	71.84	72.15	71.84	69.76	72.99	61.03	69.04	68.73	68.28	67.42	67.73	66.97
213	P. arsenicoxydans	51.76	62.9	62.9	63.66	59.91	59.76	62.35	61.74	62.04	62.35	63.26	63.41	62.04	60.37	61.28	62.04	59.82	60.73	60.57	59.73	60.42	60.88	61.61	65.03	65.24	63.57	63.26	63.26	62.2	63.71	66.41	66.41	66.62	67.17	67.63	67.17	67.88	68.19	69.41	67.93	70.26	60.45	68.64	66.36	66.97	65.91	65	65
214	P. piscium	52.06	64.43	64.43	64.27	60.67	61.74	62.96	63.41	63.72	62.2	63.11	63.87	62.65	60.67	62.04	62.5	60.12	61.33	60.88	59.88	60.12	60.88	61.46	66.1	66.31	64.79	63.26	63.26	63.11	64.01	66.41	66.41	66.77	67.33	68.09	67.63	68.34	68.65	69.71	68.09	70.86	60.42	69.49	65.86	67.67	66.01	65.56	65.86
215	P. mucoides	51.76	63.51	63.51	63.82	60.82	61.28	62.96	62.8	63.11	62.35	63.11	64.18	62.65	60.21	62.2	62.35	59.82	60.88	61.18	60.18	60.27	60.57	61	66.26	66.46	65.24	61.89	61.89	62.2	63.4	67.02	67.02	67.38	67.33	68.24	68.54	68.95	69.25	70.02	68.39	71.02	60.91	69.09	66.21	67.73	66.36	66.21	65.91
216	P. gregormendelii	51.45	63.21	62.9	63.97	59.91	60.06	62.96	63.11	63.41	61.59	62.5	63.87	61.74	59.15	62.04	62.35	59.82	60.73	61.33	60.18	61.18	60.73	61.91	65.95	66.16	64.79	62.5	62.5	62.2	64.32	67.02	67.02	67.23	67.02	67.63	67.48	68.95	69.25	69.86	67.78	70.71	60.45	69.24	65.76	67.12	66.67	66.36	66.52
217	P. migulae	52.21	64.27	64.27	64.89	61.13	61.28	63.72	63.41	63.72	62.65	63.41	64.18	63.26	60.52	62.2	62.5	60.42	61.48	61.18	60.93	61.48	61.03	60.85	66.87	66.77	65.4	62.8	62.8	62.65	63.86	68.09	67.78	68.75	68.09	69.76	69.15	69.56	69.86	70.02	69	71.47	61.52	69.24	66.82	69.39	66.67	66.36	66.67
218	P. lini	52.67	63.97	63.97	64.27	61.74	61.89	63.41	63.87	64.18	61.59	63.72	64.02	63.57	60.52	62.5	62.8	60.73	61.33	61.63	60.78	61.33	61.03	61.91	67.02	66.92	65.7	63.11	63.11	63.11	64.32	67.93	67.93	68.6	68.84	69.76	70.06	70.62	70.62	70.93	69.45	72.53	61.52	69.24	66.52	67.88	67.27	66.82	66.36
219	P. farris	52.37	64.73	64.43	65.04	61.59	61.59	63.41	63.57	63.87	62.35	63.57	64.79	62.65	60.06	62.96	63.11	60.42	61.48	61.63	61.23	62.08	61.18	62.67	67.33	67.23	66.31	63.41	63.41	62.96	64.17	68.54	68.54	69.05	68.69	70.21	70.21	70.62	70.62	70.62	69.45	71.78	60.45	70	66.97	68.03	67.12	66.97	66.52
220	P. silesiensis	52.52	64.73	64.73	65.04	62.04	62.2	63.87	63.72	64.02	63.11	63.41	64.94	63.26	60.98	63.26	63.87	61.33	61.63	61.93	61.23	61.78	61.63	62.22	67.02	67.38	65.85	63.72	63.72	62.96	64.01	68.39	68.69	68.6	68.69	69.76	69.6	70.32	70.32	71.08	69.6	72.38	61.21	70.61	67.73	68.79	67.73	67.58	67.12
221	P. frederiksbergensis	51.91	64.58	64.58	65.04	61.59	61.43	63.72	63.26	63.57	63.26	65.09	64.63	63.72	60.98	62.8	63.87	60.88	61.78	61.33	60.63	61.78	61.33	62.22	66.87	67.07	65.7	63.87	63.87	63.57	64.78	68.24	68.24	67.84	68.69	69.76	68.84	69.56	69.86	70.32	69	71.62	61.33	70.39	67.22	67.52	66.47	66.16	66.77
222	P. mandelii	51.6	63.36	63.36	63.66	60.98	62.04	62.96	63.57	63.87	62.2	64.02	64.48	63.11	60.67	62.5	63.41	59.97	60.42	60.42	59.88	61.03	60.27	61.31	66.1	66.31	64.79	63.11	63.11	63.57	63.55	67.33	67.33	67.84	67.78	68.69	68.69	69.1	69.41	70.02	69.15	71.32	60.12	69.18	65.86	67.37	66.16	66.01	66.16
223	P. prosekii	52.37	63.66	63.51	63.97	61.74	61.89	63.41	62.8	62.96	61.28	62.8	64.79	63.72	61.13	61.74	63.87	60.42	62.54	61.18	60.93	62.84	61.33	62.22	67.64	67.84	66.16	63.26	63.26	63.72	65.08	68.09	67.93	67.99	68.84	70.06	67.93	69.86	70.17	70.02	70.52	71.78	60.88	68.88	66.01	67.52	65.56	65.86	65.71
224	P. laurylsulfatiphila	52.52	64.58	64.27	64.43	62.65	61.74	62.65	62.96	63.26	62.04	62.65	63.72	64.33	60.82	62.5	62.65	61.63	62.24	62.39	60.48	61.03	61.78	61.31	67.02	66.77	65.55	62.8	62.8	62.2	62.63	67.63	67.63	67.68	68.4	69.21	69.31	68.8	69.1	69.25	68.39	71.62	61.18	68.44	66.16	67.98	65.76	65.61	66.36
225	P. laurylsulfatovorans	52.52	64.58	64.27	64.43	62.65	61.74	62.65	62.96	63.26	62.04	62.65	63.72	64.33	60.82	62.5	62.65	61.63	62.24	62.39	60.48	61.03	61.78	61.31	67.02	66.77	65.55	62.8	62.8	62.2	62.63	67.63	67.63	67.68	68.4	69.21	69.31	68.8	69.1	69.25	68.39	71.62	61.18	68.44	66.16	67.98	65.76	65.61	66.36
226	P. azerbaijanoriens	52.37	64.58	64.27	64.43	62.65	61.74	62.65	62.96	63.26	62.04	62.65	63.72	64.33	60.82	62.5	62.65	61.63	62.24	62.69	60.48	61.03	61.78	61.31	67.02	66.77	65.55	62.8	62.8	62.2	62.63	67.63	67.63	67.68	68.4	69.21	69.31	69.1	69.41	69.56	68.39	71.62	61.18	68.44	66.16	67.98	65.76	65.61	66.36
227	P. jessenii	52.52	64.43	64.12	64.43	62.5	62.2	63.41	63.41	63.72	62.04	63.11	64.48	64.33	61.43	62.65	64.02	61.93	62.39	62.84	61.83	61.78	61.48	61.91	66.87	67.38	66.16	63.26	63.26	62.65	62.94	67.17	67.48	67.68	68.7	69.36	68.55	69.41	69.71	69.56	68.84	71.32	61.18	67.98	66.01	67.98	66.06	66.21	66.06
228	P. vancouverensis	52.82	65.34	65.04	64.58	62.96	61.59	63.26	63.41	63.72	61.28	62.35	63.41	63.72	61.13	62.96	62.2	63.14	62.39	62.24	61.68	62.24	61.03	62.67	66.56	66.62	66.77	63.87	63.87	63.57	63.25	68.39	68.39	68.6	68.55	70.27	69.16	68.34	68.65	68.65	67.93	71.32	60.42	69.35	66.16	67.52	64.85	65.61	65.45
229	P. izuensis	53.13	64.27	64.27	64.43	61.74	61.74	63.72	62.2	62.5	61.59	62.5	63.57	64.18	61.28	61.63	63.26	61.93	62.08	61.78	60.78	62.24	61.93	61.46	66.87	67.23	65.85	62.77	62.77	61.85	62.75	67.78	67.78	68.9	67.48	69.21	69.01	69.1	69.41	68.98	68.84	70.71	60.88	69.04	65.56	68.13	66.52	66.06	66.52
230	P. umsongensis	52.98	64.58	64.27	64.58	62.04	61.89	63.87	62.04	62.5	61.74	62.35	64.02	63.57	60.21	62.35	62.8	61.18	61.93	61.78	60.48	61.48	60.57	62.97	66.56	66.46	65.55	62.8	62.8	63.26	62.33	67.93	68.24	68.45	68.09	68.45	69.16	67.88	68.19	68.19	67.33	70.71	60.12	69.5	66.92	67.52	66.36	66.36	66.06
231	P. mohnii	52.82	64.12	64.12	63.82	60.98	60.52	63.11	62.35	62.65	61.28	61.13	64.33	62.65	60.37	61.13	62.5	59.21	60.57	60.57	59.43	61.48	60.88	60.7	65.49	65.7	65.24	63.26	63.26	63.72	63.55	67.17	67.17	68.45	67.63	68.9	68.7	68.65	68.95	68.49	67.63	71.93	60.27	68.59	65.56	67.52	65.15	65.45	65.91
232	P. moorei	52.67	63.97	63.97	64.43	61.43	60.67	62.96	61.74	62.04	61.43	62.04	63.72	63.11	60.98	60.82	63.11	60.12	61.78	60.73	60.18	60.88	60.12	61	64.88	65.4	64.48	62.5	62.5	63.26	62.48	66.87	66.87	67.68	67.02	68.45	68.09	67.73	68.04	68.65	67.48	70.86	59.82	67.22	65.41	67.22	65	65.15	65.15
233	P. reinekei	52.21	65.19	65.19	64.73	61.74	61.28	63.72	62.8	63.11	62.2	62.96	64.33	63.11	61.28	61.74	64.33	61.48	61.93	62.99	60.93	61.93	61.18	61.76	67.02	66.92	66.01	63.11	63.11	63.87	63.25	67.78	67.48	68.9	67.63	69.51	68.24	69.41	69.71	69.41	68.69	71.62	60.88	68.74	65.86	68.43	65.91	66.52	66.36
234	P. azerbaijanoccidens	51.76	64.43	64.43	64.58	61.28	60.82	63.41	62.35	62.65	61.74	62.35	63.72	62.2	60.82	60.67	63.87	60.27	61.78	62.39	61.23	60.88	60.73	61.61	66.41	67.07	66.01	62.65	62.65	63.11	63.09	67.33	67.33	67.68	67.18	69.05	68.09	68.34	68.65	68.65	67.33	70.86	60.27	68.74	65.56	67.37	65.15	65.45	65.91
235	P. gessardii	50.84	63.05	63.05	63.51	61.28	62.04	63.11	62.8	63.26	61.89	64.79	64.02	63.11	60.98	62.65	62.8	61.18	62.24	61.03	60.93	61.48	58.61	60.7	67.02	66.77	66.31	62.5	62.5	62.5	64.01	67.17	67.17	68.14	67.78	68.24	68.69	69.41	69.71	68.95	70.06	72.69	61.18	69.03	65.86	67.82	66.16	66.92	66.01
236	P. shahriarae	50.23	63.05	63.05	63.36	60.52	61.43	62.65	62.35	62.65	61.13	63.72	63.87	62.5	60.82	61.74	63.41	60.12	60.88	60.27	60.03	60.73	58.46	60.09	66.26	66.31	65.4	62.2	62.2	63.11	64.32	67.17	66.87	67.68	67.33	68.24	68.54	68.65	68.95	68.34	69.91	71.78	61.18	68.58	65.26	67.67	65.41	66.31	65.86
237	P. proteolytica	51.6	63.21	63.21	63.51	61.59	61.89	63.57	63.11	63.57	62.2	64.02	63.87	62.96	61.13	62.8	63.11	61.18	62.08	61.48	61.23	61.48	58.91	61.15	67.02	67.07	66.16	62.35	62.35	62.65	64.01	67.33	67.02	67.99	67.93	67.93	68.09	69.1	69.41	69.1	69.91	72.38	60.42	68.88	65.86	67.52	65.86	66.92	65.41
238	P. brennerii	51.15	63.36	63.66	64.12	61.13	62.2	64.18	64.02	64.33	63.11	64.94	64.02	63.57	61.43	63.11	63.87	61.48	62.54	61.78	61.83	62.08	59.52	61.31	67.79	67.68	67.07	63.26	63.26	63.26	64.01	68.09	67.78	69.21	68.69	68.54	69.15	69.86	70.17	69.41	70.06	72.84	61.03	69.34	66.47	68.58	66.62	67.07	66.47
239	P. mucidolens	52.06	63.36	63.36	63.36	61.89	62.2	63.26	63.72	64.02	61.28	64.33	65.09	63.41	61.28	63.26	64.94	60.88	61.63	61.33	60.93	61.48	60.57	61	67.18	67.38	66.16	63.57	63.57	63.72	63.86	67.78	67.78	67.68	69.91	69.45	68.39	69.1	69.41	69.25	70.06	72.08	61.15	68.74	67.37	67.22	66.01	66.92	66.16
240	P. bubulae	52.21	63.66	63.51	63.66	60.82	60.98	64.18	62.96	63.26	63.11	62.5	64.79	63.57	60.82	63.44	63.87	62.24	62.24	61.33	60.03	62.24	61.33	61.31	64.62	64.99	64.23	64.13	64.13	63.98	64.18	66.92	66.62	68.14	66.77	67.37	67.37	67.43	67.73	67.62	67.07	69.35	60.67	66.92	65.41	65.11	65.11	64.8	64.5
241	P. fragi	52.06	63.51	63.66	64.12	61.13	61.74	64.33	64.48	64.79	62.35	61.89	65.24	64.33	60.21	64.18	64.48	61.93	61.63	61.33	60.03	62.54	62.24	61.61	65.7	65.75	65.3	64.48	64.48	64.63	64.22	67.22	66.92	67.99	67.37	67.37	67.22	68.65	68.95	68.49	68.59	70.71	60.21	68.58	65.86	67.52	65.26	64.95	64.95
242	P. deceptionensis	51.76	63.36	63.51	63.36	61.43	61.43	63.41	64.33	64.63	62.2	62.35	64.63	63.87	60.37	63.72	63.57	61.63	60.88	61.18	59.73	62.54	62.39	60.85	64.32	64.54	63.62	64.94	64.94	64.33	64.83	66.31	66.16	67.38	66.77	67.37	66.92	67.43	67.73	67.58	67.83	70.11	59.91	66.92	64.8	66.01	65.71	64.95	64.8
243	P. psychrophila	51.76	63.97	63.82	63.97	61.28	61.59	63.72	64.18	64.48	62.35	63.26	64.79	64.63	61.43	63.41	63.57	62.39	61.78	61.18	60.93	62.69	61.93	62.06	64.62	64.84	64.38	65.4	65.4	65.09	64.68	66.46	66.31	67.53	67.22	67.83	67.22	67.58	67.88	68.49	67.68	70.56	60.36	67.52	65.11	66.16	66.01	64.5	64.35
244	P. versuta	50.99	63.36	63.21	62.75	60.82	60.82	63.57	64.18	64.18	60.98	63.26	64.02	63.11	61.28	62.65	62.96	61.63	61.18	61.33	59.88	61.48	61.48	60.7	64.78	64.54	64.38	64.02	64.02	64.48	64.53	65.86	65.86	66.62	67.83	66.77	67.53	66.97	67.28	66.82	66.62	69.35	59.76	66.77	64.65	65.41	65.86	64.95	64.65
245	P. lundensis	51.3	62.75	62.9	63.05	61.28	61.89	62.96	63.11	63.57	61.89	62.65	64.48	64.18	61.89	62.8	63.72	63.29	62.08	61.33	60.18	62.84	60.57	61	64.78	64.84	64.38	64.18	64.18	63.41	64.37	66.46	66.16	67.12	66.77	67.98	66.16	66.87	67.17	67.93	67.53	69.8	60.21	66.92	64.35	65.86	63.75	63.29	63.75
246	P. weihenstephanensis	51.45	63.05	63.21	63.66	61.59	61.59	62.8	61.89	62.35	60.67	61.28	64.18	62.35	58.99	62.5	62.96	61.48	60.57	59.97	59.13	62.39	60.88	60.55	64.32	64.38	64.54	64.18	64.18	63.87	64.07	66.46	66.16	67.23	66.01	67.37	66.92	66.97	66.97	66.97	66.77	68.74	58.7	66.77	63.75	65.26	63.6	63.14	63.29
247	P. taetrolens	51.45	64.43	64.43	64.43	63.26	62.8	64.33	63.87	64.33	61.74	63.11	64.33	65.09	61.89	64.48	64.48	63.6	62.54	62.54	60.78	63.14	61.63	61.46	65.54	65.6	65.3	64.79	64.79	65.09	63.91	67.53	67.22	67.88	67.68	69.2	67.37	68.09	68.39	68.24	69.04	71.17	60.42	68.43	65.26	66.62	65.56	65.41	64.8
248	P. saxonica	50.69	61.83	61.98	62.44	60.37	60.82	63.11	62.2	62.5	60.52	61.13	63.72	62.96	60.52	62.35	63.72	61.18	61.03	60.27	59.73	61.63	59.97	61.76	64.93	65.14	64.54	63.11	63.11	63.57	63.3	66.62	66.31	67.07	66.01	67.07	66.46	66.82	66.82	66.82	66.77	68.74	59.15	66.77	64.05	65.56	62.84	62.24	62.99
249	P. endophytica	51.3	60.92	60.76	60.92	60.67	60.06	62.2	62.35	62.65	60.98	60.67	63.41	61.59	60.21	60.37	61.89	60.88	60.73	60.57	58.83	59.52	59.67	60.24	63.25	63.32	62.56	64.02	64.18	63.11	62.63	64.34	64.34	64.54	64.64	64.95	64.8	64.74	64.74	65.65	65.71	67.37	59.46	66.62	62.54	63.44	64.05	63.44	64.5
250	P. helleri	52.52	63.05	62.9	62.29	61.74	62.65	62.35	63.41	63.87	61.59	62.04	64.02	62.96	61.28	62.65	63.26	61.48	61.93	61.48	61.38	61.03	60.57	61.15	64.93	65.14	64.38	64.48	64.48	63.87	62.48	65.4	65.4	66.36	66.16	66.31	67.22	67.17	67.17	67.17	66.46	69.2	60.51	67.07	65.71	65.56	64.5	64.5	66.31
251	P. abietaniphila	52.52	63.51	63.51	62.6	63.57	61.89	61.74	63.41	63.57	61.74	61.59	64.18	61.59	60.21	61.59	62.2	60.73	61.78	59.67	61.53	62.69	60.97	62.06	66.31	66.36	65.91	66.62	66.77	66.77	64.47	66.92	67.07	67.43	69.36	68.45	67.23	68.69	69	69.3	68.13	73.14	60.73	68.45	66.92	67.67	66.92	67.37	66.46
252	P. bohemica	51.91	61.22	61.07	60.15	60.52	60.06	61.43	60.98	61.13	60.98	61.13	63.41	61.28	59.3	60.82	60.06	59.06	60.12	58.16	59.73	60.88	58.4	60.85	64.01	64.23	63.62	64.18	64.18	64.48	62.79	66.46	66.31	66.97	66.46	66.77	66.16	67.48	67.48	67.78	65.25	71.17	59.82	66.77	65.41	66.16	64.49	65.86	64.04
253	P. graminis	51.6	64.58	64.58	63.21	63.41	62.8	63.72	63.57	63.72	62.5	60.82	65.85	63.57	60.52	61.89	63.26	62.24	63.14	60.57	62.87	63.29	61.88	63.73	67.38	67.58	66.82	64.48	64.48	64.33	62.79	68.13	68.29	68.19	69.51	68.75	67.53	68.54	68.84	69.3	68.74	72.23	59.67	70.43	67.82	69.34	66.92	66.62	66.77
254	P. lutea	49.62	62.29	62.44	61.53	62.5	61.28	62.96	62.2	62.2	60.67	61.43	65.55	62.5	60.67	61.28	61.74	61.48	62.39	60.12	61.98	61.63	60.06	61.76	64.47	64.54	64.23	64.63	64.63	64.79	63.09	66.01	66.16	66.21	68.9	67.07	66.16	66.87	67.17	67.02	67.37	71.93	59.67	69.01	66.92	66.47	65.1	65.55	66.16
255	P. savastanoi	52.52	63.51	63.66	62.75	64.33	63.26	62.35	62.96	63.11	60.82	62.2	65.4	62.35	60.98	62.2	63.87	62.08	62.24	61.48	61.23	61.18	61.57	61.15	66.46	66.36	66.67	65.7	65.7	66.01	63.4	67.53	67.98	67.12	67.98	66.62	66.77	67.33	67.02	67.17	68.29	71.17	60.27	68.28	65.26	65.56	63.44	64.5	65.41
256	P. tremae	52.52	63.51	63.66	62.75	64.48	63.26	62.2	62.8	62.96	60.98	62.35	65.24	62.2	60.82	62.04	63.72	62.08	62.08	61.33	61.23	61.18	61.42	61	66.62	66.51	66.82	65.7	65.7	65.7	63.09	67.53	67.98	67.12	67.98	66.62	66.77	67.33	67.02	67.17	68.13	70.86	60.27	68.13	65.26	65.41	63.44	64.35	65.41
257	P. amygdali	52.37	63.66	63.82	62.9	64.48	63.41	62.2	63.26	63.41	61.13	62.5	65.55	62.5	61.13	62.35	63.87	62.39	62.54	61.63	61.38	61.48	61.72	61.46	66.77	66.51	66.97	66.01	66.01	65.85	63.4	67.83	68.29	67.43	68.29	66.92	67.07	67.63	67.33	67.33	68.44	71.32	60.57	68.43	65.56	65.71	63.9	64.8	65.86
258	P. ficuserectae	52.21	63.51	63.66	62.75	64.33	63.26	62.2	63.11	63.26	61.13	62.04	65.7	62.35	60.98	61.89	63.87	61.93	62.24	61.33	61.23	61.48	61.72	61.46	66.62	66.51	66.97	66.01	66.01	66.01	63.4	67.53	67.98	67.12	68.13	66.92	66.92	67.63	67.33	67.48	68.13	71.02	60.57	68.58	65.56	65.71	63.75	64.65	65.71
259	P. meliae	52.37	63.51	63.66	62.75	64.33	63.26	62.5	63.11	63.26	61.28	62.35	65.85	62.5	61.13	62.04	64.02	62.08	62.24	61.33	61.38	61.48	61.72	61.46	66.77	66.67	66.97	66.01	66.01	66.01	63.4	67.83	68.29	67.43	68.29	67.07	67.22	67.78	67.48	67.63	68.44	71.17	60.57	68.58	65.71	65.71	63.75	64.65	65.71
260	P. caricapapayae	52.82	63.36	63.51	62.6	64.33	63.57	62.35	63.72	63.87	61.43	62.35	65.09	62.8	61.13	61.74	63.72	62.54	62.69	62.69	61.68	62.39	62.18	62.22	66.92	66.82	66.97	66.62	66.62	66.46	64.62	67.53	67.68	67.43	67.07	66.46	67.22	67.93	67.63	67.17	68.13	71.02	61.33	68.73	65.26	65.71	64.35	65.26	65.41
261	P. cerasi	52.67	64.89	65.34	63.36	65.4	63.72	63.11	63.41	63.41	61.74	61.89	66.01	62.8	60.98	61.74	64.48	63.6	62.99	62.24	63.02	62.54	63.09	62.37	68.3	68.04	68.04	66.62	66.31	67.07	64.62	67.83	68.29	68.04	68.44	66.92	67.68	68.84	68.54	68.39	68.74	72.23	60.73	69.03	66.01	67.67	64.35	65.71	66.47
262	P. syringae	52.52	65.5	65.65	63.36	65.09	63.72	62.96	62.8	62.8	62.96	62.5	66.46	62.65	61.74	62.04	64.48	63.14	62.84	62.08	62.43	62.84	62.93	61.91	67.69	67.73	67.73	66.31	66.31	66.16	64.17	67.53	67.98	68.04	67.98	66.77	67.83	68.09	67.78	68.09	68.74	72.38	61.03	69.79	65.71	67.52	64.5	66.16	66.31
263	P. congelans	52.21	65.04	65.19	62.9	64.48	63.41	62.96	62.8	62.8	62.2	61.89	65.7	62.2	61.28	61.89	64.18	62.84	62.54	62.08	62.28	62.39	62.48	61.91	67.38	67.43	67.43	66.31	66.31	65.7	64.01	67.37	67.83	67.58	67.53	67.22	67.37	68.54	68.24	68.54	68.74	71.93	60.88	68.88	65.26	67.22	64.2	65.26	65.86
264	P. coronafaciens	52.37	65.19	65.04	62.9	64.79	64.02	63.26	63.72	63.87	61.28	61.43	65.4	63.26	61.28	60.98	64.02	62.69	62.99	61.78	61.23	61.78	61.88	61.76	66.56	66.46	67.23	65.09	65.09	64.48	62.94	66.57	66.72	66.77	67.78	67.02	66.87	66.67	66.67	67.28	68.39	71.47	59.37	68.28	64.35	66.16	63.75	65.26	64.8
265	P. avellanae	50.84	64.43	64.58	63.21	64.33	64.02	62.65	64.63	64.79	60.82	61.74	65.24	63.41	61.74	62.65	64.18	62.69	63.6	61.78	63.17	62.39	61.42	61.76	68.15	68.49	66.82	65.85	65.85	66.31	63.86	67.22	67.68	67.58	69.2	67.37	67.22	68.84	68.54	68.69	69.35	70.71	60.12	68.13	66.01	67.22	65.41	65.71	66.16
266	P. cannabina	50.69	63.51	63.66	62.14	64.33	63.41	60.98	60.06	60.37	60.06	61.13	64.79	60.98	60.67	61.43	62.2	61.33	62.08	60.42	60.93	61.63	62.03	60.85	65.64	65.4	65.85	65.4	65.4	64.48	64.01	66.57	67.02	66.46	67.48	66.11	66.26	67.43	67.12	66.21	67.93	70.71	59.67	67.52	63.9	65.86	63.6	64.2	64.8
267	P. floridensis	50.84	63.97	64.12	63.66	62.8	63.57	63.26	63.72	63.72	60.67	62.5	66.31	62.96	61.13	61.43	64.18	61.63	62.69	61.78	63.32	63.29	63.54	61.61	67.99	68.34	67.12	66.92	66.92	67.68	64.47	68.59	68.74	68.8	68.44	67.53	68.13	69.6	69.6	68.84	68.74	71.32	60.57	67.67	66.92	67.67	65.41	65.26	66.31
268	P. viridiflava	51.3	63.82	63.97	63.05	64.79	63.72	62.5	63.87	64.02	62.2	62.2	66.77	63.57	62.35	61.28	65.55	62.39	63.44	61.48	62.28	61.48	61.57	62.52	66.77	67.28	67.12	66.62	66.62	66.46	63.71	67.83	67.98	68.19	68.74	67.22	67.07	68.69	68.69	68.69	67.98	71.02	59.97	68.28	66.77	66.92	64.5	65.11	65.41
269	P. asturiensis	51.15	65.19	65.04	63.82	64.79	64.79	63.11	63.11	63.11	60.98	62.65	64.63	64.18	61.43	62.65	62.96	62.39	63.29	62.08	63.02	62.69	62.33	62.22	66.46	66.21	65.6	67.23	67.23	67.23	64.62	67.53	67.68	67.58	68.29	67.07	67.37	67.93	67.93	67.93	68.13	70.71	60.27	67.22	66.62	66.31	64.65	64.8	64.95
270	P. cichorii	50.23	63.82	63.82	63.21	63.72	62.35	62.65	61.28	61.28	60.82	61.89	63.41	62.35	61.28	61.74	63.11	61.33	61.93	61.18	61.68	61.48	61.88	61.91	65.7	65.6	66.51	64.94	64.94	65.24	63.71	66.92	66.77	66.51	66.46	67.22	66.31	66.87	67.17	66.41	66.31	71.93	61.33	67.37	65.41	66.01	65.41	66.62	66.31
271	P. caspiana	52.82	62.44	62.75	62.14	62.96	61.28	63.26	62.65	62.8	61.74	62.2	65.7	62.65	61.74	62.35	64.94	62.39	62.54	61.48	63.02	61.48	60.36	61.91	65.24	65.75	65.45	67.23	67.23	67.07	63.4	64.34	64.8	65.3	67.68	66.62	66.16	67.93	67.63	68.39	66.92	72.69	60.42	68.73	65.71	66.16	65.86	66.31	67.37
272	P. ovata	51.3	64.43	65.04	63.66	64.93	63.86	62.5	63.86	63.71	60.95	63.4	65.85	64.78	62.33	64.47	63.86	63.44	63.6	62.22	63.17	62.24	62.61	63.72	69.02	68.6	69.05	66.31	66.31	65.09	64.17	68.39	68.69	68.75	69.15	69	67.02	69.86	69.86	69.56	69.3	72.38	61.63	66.92	66.92	67.98	66.47	67.52	67.67
273	P. fildesensis	51.15	63.82	64.43	65.34	60.67	62.65	64.33	63.72	63.87	62.04	64.48	64.63	63.26	60.52	62.96	62.5	62.39	61.93	61.48	60.63	61.48	61.63	62.22	66.87	66.62	66.01	62.8	62.8	63.26	63.4	67.48	68.09	68.45	68.39	68.24	67.78	68.8	68.8	68.95	69.91	71.47	60.73	69.64	64.8	66.31	65.41	64.95	66.31
274	P. veronii	52.21	63.66	64.27	64.73	61.13	62.8	65.85	64.79	64.94	62.2	65.4	65.24	63.11	60.21	62.65	64.02	61.78	61.93	61.63	60.63	61.48	61.48	62.37	67.33	67.53	67.07	63.72	63.72	64.02	63.86	68.24	68.54	68.9	69	68.39	68.24	69.1	69.1	68.49	70.82	71.93	61.48	69.49	65.41	66.92	66.16	66.16	66.16
275	P. orientalis	51.45	63.97	64.58	65.34	60.82	62.5	63.72	64.79	64.94	62.5	64.63	65.4	63.41	62.04	63.41	63.57	62.08	61.18	62.24	61.38	61.03	61.93	61.91	66.72	66.62	66.31	64.33	64.33	64.02	63.71	67.17	67.78	68.14	68.39	68.69	67.33	69.25	69.25	70.32	69.76	71.17	60.73	68.58	64.5	65.86	65.11	65.71	66.16
276	P. allii	51.59	64.34	64.98	65.13	62.22	64.29	64.98	65.4	65.56	63.65	65.4	65.4	63.97	61.27	63.33	63.65	63.58	62.64	63.36	61.9	62.01	63.09	64.03	69.7	69.73	68.15	64.82	64.82	64.34	64.65	68.4	68.72	68.94	69.51	68.56	68.88	70.57	70.57	70.25	69.83	71.14	60.91	68.76	66.09	66.25	65.62	65.93	66.25
277	P. extremorientalis	52.52	65.34	65.95	65.19	62.8	63.87	64.94	65.09	65.24	64.33	65.7	65.85	64.02	61.28	64.48	64.33	62.99	62.54	63.29	62.28	63.44	62.39	62.52	69.02	69.21	68.6	64.48	64.48	63.57	64.01	69.3	69.76	69.97	69.76	68.84	69.3	70.62	70.62	70.17	70.52	72.08	60.57	69.18	66.01	66.92	66.01	66.16	66.62
278	P. azotoformans	51.91	65.04	65.65	65.34	62.8	63.57	65.09	65.09	65.24	63.87	66.01	66.16	64.48	62.35	64.33	64.18	63.29	63.29	63.14	62.57	63.14	62.84	62.97	68.25	68.29	67.53	64.18	64.18	63.11	63.86	69.76	70.06	70.27	69.91	68.39	69.6	70.32	70.32	69.25	70.52	71.47	61.03	69.18	65.86	66.47	66.16	66.31	66.77
279	P. canadensis	51.47	63.27	63.89	64.35	60.96	63.27	63.89	63.89	64.04	62.65	64.51	63.43	62.81	60.65	62.04	62.96	61.31	60.7	61.01	60.91	60.7	61.16	61.44	67.24	67.28	66.2	64.35	64.35	64.66	63.88	67.85	68.15	68.98	68.46	67.54	67.69	68.72	68.72	68.41	69.54	70.81	59.02	67.13	65.14	65.75	65.6	65.9	65.29
280	P. lurida	53.59	63.97	64.58	65.34	62.2	64.18	65.7	64.79	64.94	63.11	64.33	64.33	63.57	60.52	63.11	64.63	62.24	62.39	62.08	62.28	62.08	63.14	62.52	68.87	69.05	67.99	64.63	64.63	64.63	63.86	68.69	69	69.51	69.3	69	68.84	69.86	69.86	69.56	70.67	71.78	60.88	68.58	66.16	67.07	65.71	65.71	65.86
281	P. simiae	52.67	64.43	65.04	64.73	62.5	63.57	65.55	65.24	65.4	64.48	64.48	65.4	64.48	61.89	63.87	65.09	63.29	62.24	64.2	61.98	61.93	63.29	63.58	68.87	68.9	68.29	65.55	65.55	64.18	64.32	68.84	69.15	69.51	70.06	69.6	69.15	71.23	70.93	70.93	70.36	71.78	60.42	69.34	66.62	66.77	65.86	66.16	66.31
282	P. palleroniana	52.06	63.36	63.97	63.51	61.74	61.89	65.09	63.05	63.21	63.36	64.12	64.18	62.96	60.06	62.65	64.02	62.24	61.33	62.03	61.08	62.24	62.08	62.22	66.72	66.77	66.62	65.4	65.4	64.02	63.71	68.84	69.15	69.51	68.54	69.45	69.6	69.56	69.56	69.41	68.54	70.26	60.51	68.84	66.11	65.36	64.9	65.05	65.51
283	P. tolaasii	52.67	65.04	65.34	64.58	62.65	63.41	65.09	64.63	64.79	63.87	64.48	65.24	62.96	60.67	62.8	64.02	63.14	63.29	63.75	62.28	61.93	62.24	62.52	67.94	67.99	67.53	64.63	64.63	65.24	63.86	68.69	69	69.66	69.6	68.39	69.3	70.02	70.32	69.56	69.91	70.41	60.12	69.64	66.77	66.47	66.16	66.31	66.31
284	P. aylmerense	52.82	65.19	65.8	65.95	62.5	64.18	65.4	65.09	65.24	64.33	66.01	65.09	64.33	61.43	63.26	64.63	63.75	62.84	62.54	62.28	61.93	62.24	63.28	69.48	69.51	68.6	65.4	65.4	64.94	63.4	70.06	70.36	70.73	70.21	69.6	70.06	70.62	70.62	70.47	70.97	72.23	61.33	70.09	67.37	67.67	65.86	66.01	66.92
285	P. edaphica	51.6	63.66	64.27	64.58	61.89	64.02	64.33	64.79	64.94	62.65	63.87	64.79	63.11	60.82	62.8	63.72	62.54	62.08	62.39	61.83	60.88	61.63	62.37	67.48	67.38	66.77	64.79	64.94	63.72	63.55	67.78	68.09	68.45	69.15	68.69	68.09	69.56	69.25	68.65	69.6	71.02	60.88	69.03	65.71	65.86	65.26	65.11	66.16
286	P. salomonii	51.76	64.73	65.34	65.34	62.35	64.02	64.79	65.09	65.24	63.26	64.63	65.55	63.57	60.52	63.11	64.18	63.29	62.54	62.54	61.98	60.88	62.08	62.67	67.79	67.68	67.07	65.4	65.4	64.18	64.01	68.09	68.39	68.75	69	69.15	68.69	70.47	70.17	69.56	69.91	71.02	61.33	69.64	66.16	66.77	65.56	65.41	66.31
287	P. extremaustralis	51.6	64.73	65.34	64.43	62.35	62.96	65.55	64.48	64.63	63.11	64.63	65.24	63.41	61.59	62.2	64.02	61.63	61.48	61.63	61.38	62.08	61.33	63.13	67.64	67.99	67.23	64.48	64.48	63.72	64.17	68.54	69.15	69.36	69.45	68.39	67.93	69.25	69.25	69.56	69.91	71.17	61.48	69.94	66.62	67.22	65.86	66.16	65.41
288	P. poae	52.06	66.11	66.72	66.11	62.65	63.41	65.09	64.94	65.09	63.57	65.85	66.31	63.57	61.43	62.8	63.26	62.24	61.78	62.99	61.53	61.93	61.18	62.06	68.1	68.14	67.23	64.79	64.79	63.72	64.32	69.15	69.76	70.12	69.76	69.3	68.69	70.02	70.02	70.62	71.12	71.62	62.54	69.64	66.62	67.07	66.92	66.92	67.07
289	P. trivialis	51.15	64.89	65.5	65.5	62.2	62.65	64.48	64.63	64.79	63.41	65.4	65.85	62.8	61.74	62.65	64.33	62.54	61.78	62.24	61.98	61.78	60.57	61.91	67.48	67.68	66.62	65.55	65.55	64.48	63.86	68.24	68.54	69.05	69.91	68.69	68.69	70.02	70.02	70.32	71.12	72.08	62.69	69.49	67.37	67.52	66.62	66.92	66.92
290	P. paralactis	52.21	66.11	66.41	66.11	62.2	63.87	66.46	64.94	65.09	63.11	65.4	66.16	64.18	61.74	63.87	64.33	63.44	62.99	63.14	62.28	63.6	61.03	62.67	68.87	68.9	68.6	64.79	64.79	63.57	63.86	68.84	69.45	69.66	70.67	69.3	69.3	70.93	70.62	70.47	71.12	71.93	61.18	69.18	66.62	66.77	67.22	67.37	66.47
291	P. antarctica	52.37	62.29	62.9	63.66	61.13	62.5	64.02	64.63	64.79	63.11	65.09	65.24	63.26	61.28	63.57	63.87	61.18	61.78	61.48	60.93	61.48	60.73	62.37	67.18	67.38	66.62	64.63	64.63	64.33	64.01	67.17	67.48	68.29	68.54	67.93	68.39	70.02	70.02	69.41	69.45	72.38	61.18	69.18	64.5	66.31	64.95	65.71	65.26
292	P. fluorescens	51.76	63.97	64.58	65.04	62.8	63.11	64.94	65.09	65.24	62.65	65.55	65.24	63.72	61.43	63.41	63.41	62.24	61.48	62.08	61.68	61.93	61.33	62.97	68.4	68.6	66.92	64.48	64.48	64.33	64.32	68.69	69	69.21	69.76	69.6	68.39	70.78	70.78	70.17	70.67	72.84	61.78	69.34	66.01	66.77	65.71	66.01	66.01
293	P. libanensis	51.45	64.89	65.19	65.5	61.89	62.2	64.18	63.87	64.02	63.26	64.79	65.24	63.57	61.59	64.33	64.48	62.24	61.48	62.84	61.68	61.78	61.18	62.37	68.56	68.45	67.38	65.09	65.09	63.41	63.86	68.54	68.84	69.05	69.6	69	68.54	71.23	70.93	70.78	70.52	72.69	61.78	69.34	65.41	66.92	67.07	67.82	67.07
294	P. synxantha	51.45	64.12	64.73	64.89	62.04	62.2	64.18	63.87	64.02	62.8	65.24	65.4	63.72	61.13	63.87	64.94	62.39	61.93	62.08	61.68	61.78	61.63	62.82	68.56	68.29	67.53	64.79	64.79	64.02	64.01	68.54	68.84	69.21	69.6	69.76	69.45	71.54	71.23	71.08	70.82	72.53	61.48	69.18	65.56	66.47	67.37	67.52	67.52
295	P. khavaziana	51.6	63.51	64.12	64.73	61.43	61.74	64.18	64.18	64.33	63.26	64.33	65.24	64.18	61.89	64.02	63.87	62.69	61.78	62.99	62.87	62.39	61.63	63.13	67.94	67.68	67.23	65.7	65.4	64.33	64.47	68.69	69	69.82	69.91	68.84	69	71.54	71.23	71.23	71.12	73.14	61.63	69.34	65.56	66.31	66.92	67.37	66.62
296	P. haemolytica	50.69	62.9	63.21	63.82	60.37	61.89	64.63	63.57	63.72	62.35	64.63	64.02	63.11	60.52	63.11	62.96	62.24	61.63	61.48	60.93	60.88	60.57	61.61	67.79	67.68	66.62	64.63	64.63	63.57	63.86	67.78	67.78	68.29	68.84	67.78	68.54	70.17	69.86	69.56	70.06	71.78	60.57	67.98	64.95	66.92	65.56	65.86	65.56
297	P. carnis	52.37	64.27	64.89	65.34	61.74	62.5	65.7	64.48	64.63	64.33	65.85	66.77	64.33	61.89	63.26	64.48	62.39	62.08	61.78	61.98	63.29	63.14	63.13	68.71	68.6	68.14	64.94	64.94	63.72	63.25	69.15	69.15	69.97	70.23	70.58	69.77	70.78	70.78	71.23	70.82	72.23	62.24	69.8	66.01	67.22	66.21	66.21	66.36
298	P. paracarnis	52.37	63.82	64.43	65.19	60.98	62.2	64.94	64.63	64.79	64.18	66.01	65.4	64.02	61.13	62.99	64.18	62.24	61.93	61.93	61.68	62.84	62.54	62.67	68.1	68.14	67.53	65.2	65.2	63.37	62.75	68.69	68.69	69.51	69.62	70.27	69.01	70.17	70.17	70.03	70.52	72.38	61.48	69.2	65.26	66.92	65.61	65.61	66.06
299	P. lactis	52.52	63.51	64.12	64.73	61.13	61.74	65.24	64.63	64.79	64.02	65.24	65.85	64.02	61.43	62.8	64.18	62.08	61.78	61.78	61.68	62.99	62.69	62.97	68.4	68.14	67.53	65.4	65.09	64.02	62.94	68.39	68.39	69.21	69.47	69.82	69.01	70.62	70.62	71.08	70.82	71.78	61.33	69.5	65.56	67.22	65.45	65.45	65.76
300	P. salmasensis	52.82	63.82	64.43	64.89	61.43	62.04	65.55	64.94	65.09	64.02	65.4	65.85	64.63	61.28	63.41	64.33	62.54	61.93	62.24	61.98	63.14	62.69	63.13	68.4	68.45	67.84	65.4	65.4	63.72	62.94	68.69	68.69	69.82	69.77	69.97	69.16	70.32	70.32	70.78	70.67	72.08	61.48	69.5	65.41	67.52	66.06	65.76	66.06
301	P. kairouanesis	51.91	63.97	64.58	64.89	60.82	62.8	63.57	63.87	63.87	62.04	65.09	63.41	63.11	60.52	62.8	64.18	62.08	61.33	61.78	61.38	61.93	60.88	62.52	67.33	67.53	67.23	64.02	64.02	63.87	63.71	68.09	68.39	68.9	68.69	68.54	68.24	68.8	68.8	69.1	70.21	70.71	60.27	68.13	66.16	67.07	65.41	65.56	65.41
302	P. nabeulensis	51.3	63.66	64.27	64.43	60.98	62.65	63.72	64.33	64.48	62.96	64.63	64.02	63.87	61.28	63.57	63.57	61.93	62.08	62.08	61.98	61.63	62.08	62.37	68.25	68.29	67.07	64.33	64.33	63.72	63.25	68.69	69.3	69.82	69.45	69.3	68.69	70.47	70.47	70.17	70.52	71.47	60.27	68.43	66.01	66.31	65.71	66.77	65.71
303	P. cremoris	52.37	63.51	64.12	65.34	61.13	62.96	64.33	63.72	63.87	63.26	65.4	64.02	64.33	61.89	62.99	63.57	62.08	61.63	61.63	61.08	61.48	61.33	61.76	67.48	67.53	66.31	63.68	63.68	62.61	61.83	67.33	67.63	67.99	68.69	68.24	67.78	68.49	68.49	68.67	69.91	70.26	62.08	67.67	65.56	66.31	64.95	64.8	64.8
304	P. cyclaminis	52.21	63.21	63.82	64.12	60.82	62.5	64.79	64.63	64.79	63.11	65.7	64.79	63.87	60.98	62.84	64.48	62.54	61.63	61.48	60.78	61.33	61.18	61.91	67.48	67.53	67.23	63.68	63.68	63.68	62.6	68.09	68.39	68.75	68.69	68.39	67.93	68.65	68.65	68.22	70.06	71.17	61.33	69.34	66.16	67.82	66.01	65.71	66.01
305	P. sivasensis	51.45	62.6	63.21	64.12	59.76	61.59	64.94	62.96	63.11	61.89	65.4	63.57	63.41	60.98	62.8	62.8	61.93	61.03	61.33	60.33	61.03	61.18	61.61	66.1	65.85	65.55	63.26	63.26	62.8	62.17	67.17	67.48	67.84	67.93	67.48	67.33	68.19	68.19	68.04	69.15	69.95	60.42	68.13	65.11	66.77	64.95	64.8	64.65
306	P. grimontii	51.76	63.82	64.43	64.89	61.28	63.26	65.09	64.48	64.63	62.65	65.85	63.57	64.33	60.98	62.8	63.26	63.14	61.93	61.18	60.63	60.42	61.03	62.06	67.33	67.38	66.31	63.11	63.11	63.11	62.48	68.09	68.39	68.9	68.24	67.93	67.48	68.8	68.8	68.95	70.06	70.86	61.03	67.98	65.26	66.47	64.65	64.35	64.35
307	P. marginalis	52.21	64.12	64.73	64.89	61.74	62.96	65.24	64.48	64.63	62.96	65.55	63.57	64.48	61.13	62.8	63.41	63.14	61.63	61.48	60.48	60.57	61.18	61.91	67.64	67.68	66.62	63.11	63.11	62.8	62.79	68.39	68.69	69.21	68.69	68.39	67.63	68.95	68.95	69.1	70.36	71.02	60.88	68.13	65.56	66.47	65.11	64.65	64.8
308	P. panacis	51.76	63.51	64.12	64.43	61.28	62.65	64.94	64.48	64.63	63.11	65.7	63.11	64.02	60.82	62.96	63.41	63.29	62.08	61.63	60.18	60.57	61.18	61.76	67.33	67.38	66.46	62.96	62.96	62.8	62.94	67.78	68.09	68.6	67.93	68.54	68.09	68.95	68.95	69.1	70.36	71.17	61.18	68.43	65.56	66.62	65.11	64.8	65.11
309	P. pisciculturae	51.91	63.51	64.12	64.73	60.52	62.5	64.48	63.87	64.02	63.11	65.85	63.41	64.02	61.13	62.8	63.57	62.39	61.33	61.03	60.33	60.42	60.88	61.31	67.02	67.07	65.85	63.72	63.72	63.11	62.63	67.33	67.63	67.99	68.24	67.78	67.33	68.19	68.19	68.49	69.3	70.56	61.03	68.43	65.26	66.47	65.26	65.11	65.26
310	P. asgharzadehiana	52.06	63.82	64.43	65.34	60.82	62.96	64.18	64.48	64.63	62.35	65.09	64.63	64.63	61.13	62.8	64.18	61.63	61.63	60.88	61.23	62.24	61.63	61.61	67.79	67.84	67.23	64.18	64.18	63.72	63.86	68.54	68.84	68.9	68.69	69	68.69	69.1	69.1	69.25	70.36	71.32	61.33	68.88	66.01	66.92	65.86	65.41	66.47
311	P. rhodesiae	51.91	63.05	63.66	63.97	60.37	61.74	63.87	62.96	63.11	62.2	64.18	63.26	62.5	59.45	62.04	63.41	61.03	60.42	60.73	60.33	60.73	60.73	60.39	67.18	67.07	66.77	63.41	63.41	63.57	61.72	67.63	67.93	68.29	67.17	68.39	67.63	68.34	68.34	68.8	69	70.26	60.88	67.82	65.71	66.77	65.71	65.41	65.11
312	P. cedrina subsp. cedrina	52.52	63.51	63.82	64.73	62.5	63.57	64.33	65.09	65.24	62.5	63.72	65.7	63.87	61.28	63.87	65.7	62.08	62.84	62.84	62.57	62.08	61.78	62.22	69.17	69.66	67.99	64.63	64.63	64.79	65.24	68.84	68.84	69.82	69.6	69.6	69.15	70.93	71.23	71.69	70.97	73.6	61.63	69.49	66.16	67.22	66.47	66.92	66.62
313	P. azadiae	52.06	63.05	63.36	64.27	61.89	63.72	64.33	65.4	65.55	61.74	64.18	65.09	63.87	60.82	64.02	65.24	62.24	62.69	62.39	62.28	62.08	62.08	62.06	69.33	69.51	68.14	64.94	64.94	65.24	64.78	68.84	68.84	69.82	69.6	69.91	69.3	71.23	71.54	71.69	71.12	73.75	61.18	69.34	65.86	67.37	66.16	66.92	66.47
314	P. cedrina subsp. fulgida	52.06	63.82	64.12	65.04	62.04	63.87	65.09	66.31	66.46	62.8	64.18	65.09	63.72	61.13	64.79	65.55	62.08	62.69	62.39	62.57	62.39	62.99	62.52	69.33	69.36	68.14	65.09	65.09	64.63	65.39	69.3	69.45	70.12	70.36	69.91	69	70.93	71.23	71.39	70.82	73.9	61.48	69.49	66.77	68.43	67.07	66.92	66.92
315	P. tritici	52.21	62.6	63.21	63.82	61.13	62.8	63.41	63.57	63.87	61.43	63.26	64.18	63.11	60.67	62.96	63.57	61.33	61.78	60.73	60.93	60.73	60.88	61	67.79	67.68	66.92	64.79	64.79	65.09	64.47	67.48	68.09	68.14	68.24	68.24	68.39	69.41	69.41	69.41	69.76	71.47	60.73	68.88	65.71	66.62	65.71	66.16	66.62
316	P. costantinii	51.45	62.9	63.51	63.66	60.98	62.96	63.72	63.72	64.02	61.13	63.87	64.33	62.5	60.21	62.04	61.89	62.08	61.33	60.73	60.93	60.88	61.78	62.67	67.02	67.07	65.55	64.33	64.33	63.72	63.09	66.87	67.02	67.23	68.84	68.09	66.87	70.02	70.02	69.71	69.45	70.26	61.18	68.13	64.2	65.86	65.71	65.26	65.56
317	P. kitaguniensis	51.76	63.82	64.43	65.19	61.74	62.5	63.72	63.72	64.02	61.28	63.41	64.18	63.72	60.98	63.11	64.33	62.08	61.78	61.48	61.53	61.78	60.73	62.06	67.79	67.68	66.46	64.18	64.18	63.57	63.09	67.93	68.24	68.45	68.45	69.31	68.6	69.71	69.56	69.86	69.6	70.71	60.12	69.04	64.5	66.01	66.62	65.55	66.31
318	P. yamanorum	51.15	63.36	63.05	62.75	61.13	62.2	62.65	61.89	62.35	61.13	65.24	62.04	62.8	61.13	61.89	64.02	61.33	61.63	60.88	61.08	61.93	59.97	60.09	67.18	66.92	66.46	63.26	63.26	63.26	63.4	67.93	67.63	67.99	67.93	67.33	69.15	68.65	68.95	68.19	69.76	72.69	61.03	67.98	66.01	66.31	64.95	65.56	65.56
319	P. spelaei	51.6	63.36	63.05	63.05	60.52	61.13	62.04	62.65	63.11	61.74	62.96	64.18	62.5	60.37	60.27	63.11	60.42	61.03	61.18	59.88	60.57	58.91	60.7	66.72	66.62	66.16	62.31	62.31	62.46	63.51	66.57	66.26	67.53	67.48	67.02	67.17	67.43	67.73	68.02	68.84	70.56	60.27	67.67	65.41	66.01	65.26	65.56	65.86
320	P. karstica	50.99	61.98	62.29	62.75	59.91	60.67	61.89	61.43	61.89	61.13	62.5	64.48	62.2	61.28	61.18	63.26	59.82	60.27	60.57	59.28	61.78	59.21	60.55	65.03	65.24	64.48	61.7	61.7	62.61	63.36	65.5	65.2	66.92	66.41	66.41	65.65	67.12	67.43	67.57	68.39	70.26	59.67	67.37	64.5	66.16	64.05	65.11	64.5
[truncated: 272 more columns]

## Sheet: Table S6
		1	2	3	4	5	6	7	8	9	10	11	12	13	14	15	16	17	18	19	20	21	22	23	24	25	26	27	28	29	30	31	32	33	34	35	36	37	38	39	40	41	42	43	44	45	46	47	48
1	Cellvibrio japonicus		70.6427	69.6019	70.0899	71.0596	70.9163	70.759	71.2437	71.447	71.3093	71.3168	71.366	71.4878	71.2882	71.3079	71.2096	71.331	71.4922	71.3917	70.818	71.0616	70.9528	70.7368	70.8034	70.996	71.2956	71.2721	71.0496	71.0414	71.33	71.1315	71.3403	70.8292	70.6806	70.9029	70.5695	70.9326	70.9963	71.0941	71.3544	71.4009	71.0911	71.1145	71.5234	71.1688	70.8616	71.3337	71.2206
2	Oblitimonas alkaliphila	71.3802		73.4559	71.9182	72.1285	71.3403	71.1139	72.1954	71.9999	71.7629	71.6942	71.6976	71.7871	71.7419	71.7424	71.8052	71.3092	71.6583	71.4761	71.1685	71.5903	71.3269	71.4459	71.5036	71.1116	71.3128	71.6039	71.4884	71.3843	71.4243	71.0717	71.2002	70.468	71.4393	71.3272	70.8356	71.2657	71.2582	70.9403	71.2968	71.3226	70.7769	71.1512	71.2979	71.0241	70.552	71.3154	71.2934
3	Thiopseudomonas caeni	69.4681	73.5068		70.4453	71.5746	70.6259	70.3783	72.0135	71.5376	71.0786	71.0718	70.9728	71.0555	71.0447	71.1077	70.8786	70.857	70.6936	70.6765	70.7028	70.9981	70.5148	70.6037	70.8069	70.6417	70.5769	70.4981	71.0276	70.7661	70.716	70.4652	70.4364	70.4555	70.8615	70.9329	70.8504	70.8216	70.664	70.8099	70.8724	70.7865	70.7434	70.8719	70.8488	70.7244	70.7544	70.7405	70.5749
4	Entomonas moraniae	70.4285	71.6915	70.3456		70.4475	70.1492	70.2695	69.6666	70.4451	70.0644	70.1316	70.166	70.1905	70.0914	70.2221	70.2976	70.2659	70.0335	69.9976	69.7312	70.1612	70.0355	69.9632	70.1564	69.6985	69.7405	69.7999	69.8914	69.8527	70.2103	69.6995	70.0865	68.8465	70.4831	70.3802	69.6178	70.0775	70.007	69.4101	69.5951	69.7956	69.0869	69.8719	70.0417	69.9782	68.9978	70.2745	70.0852
5	Azomonas agilis	70.6732	71.5222	71.5579	70.0554		72.8474	71.6009	72.5134	72.9291	72.3746	72.5717	72.4569	72.7479	72.5118	72.6319	72.1847	72.6738	72.3802	72.3926	71.8801	71.9793	72.0242	71.961	71.9033	72.5438	72.5898	72.2901	72.3607	72.5206	72.5569	72.7909	72.715	72.6714	71.9334	71.8796	71.9204	72.0884	72.8163	72.9544	72.728	72.793	72.7315	72.8705	72.9947	72.8899	72.8856	73.0429	72.8156
6	Azomonas macrocytogenes	70.5693	70.7327	70.6335	69.7056	72.7729		71.463	73.4175	73.3209	73.211	73.3973	73.1905	73.2304	73.3436	73.3047	73.102	73.6587	73.4682	73.4851	72.5689	72.7851	73.1047	72.9051	72.7233	73.7438	73.6206	73.3909	73.2778	73.4714	73.4914	74.4837	74.6595	74.5859	72.6389	72.3065	72.7935	72.7979	75.1616	75.3294	74.7801	74.9153	74.8482	75.2582	75.0401	75.1588	75.1391	75.2788	75.1546
7	Ventosimonas gracilis	70.2689	70.5216	70.4603	69.4527	71.6164	71.5039		71.6883	72.0792	71.8434	71.5403	71.4958	71.9494	71.835	71.7747	71.3656	71.7628	71.6165	71.6485	71.1249	71.6685	71.4293	71.1969	71.0492	71.6365	71.4073	71.4989	71.2268	71.274	71.5193	71.8709	72.0962	72.0067	70.5945	70.675	70.8329	70.8876	72.3069	72.4872	72.182	72.4158	72.2423	72.2642	72.3505	72.498	72.4798	72.5523	72.1796
8	Thiopseudomonas denitrificans	70.9159	71.7049	71.9331	68.7038	72.6006	73.3648	71.4124		73.5994	73.4239	73.8757	73.6184	73.8751	73.8278	73.7965	73.5246	74.2071	73.9195	73.8582	72.9351	72.9306	73.413	72.9603	72.9997	74.5769	74.473	74.4665	74.0418	74.1769	74.3297	74.4996	74.5984	74.5351	72.1771	72.2888	72.6134	72.7251	74.9502	75.2373	74.9141	75.0733	74.9723	74.9873	75.0622	75.2415	75.2267	75.2682	74.8992
9	P. hussainii	71.2652	71.5261	71.6166	69.7625	73.0327	73.2486	72.0123	73.6138		73.6871	73.9191	73.9328	74.1385	73.9255	73.9671	73.199	73.977	73.8291	73.7864	72.8878	73.1695	73.404	73.0214	72.9167	73.8895	73.6085	73.6988	73.4494	73.613	73.7984	74.4394	74.4944	74.442	72.4951	72.4507	72.6921	72.7818	74.711	75.1498	74.9645	75.1357	74.9849	74.9629	75.0152	75.2538	75.0821	75.261	74.6338
10	P. sabulinigri	71.162	71.3141	70.8442	70.4441	72.7761	73.2983	71.7727	73.725	73.8265		78.2834	77.9954	78.5442	78.9504	78.4018	75.3053	75.9562	76.4406	76.3881	75.0922	75.6059	75.511	75.3755	75.3503	76.4182	75.9357	75.8624	75.6822	75.9169	76.2031	74.086	74.1876	73.9098	72.1561	72.495	72.5615	72.7863	74.3907	74.4694	74.5312	74.5837	74.4226	74.4411	74.5488	74.7364	74.6791	74.8748	74.2891
11	P. aestusnigri	70.9537	70.7726	70.7887	69.1749	72.57	73.2524	71.4834	73.9024	73.877	78.2226		86.2813	82.099	82.454	82.9895	75.1901	76.25	76.5973	76.601	74.8246	75.1421	75.5529	75.4477	75.2406	76.6051	76.457	76.1246	75.752	76.1882	76.3185	74.3596	74.3923	74.3014	72.1896	72.4105	72.6292	72.6695	74.7953	75.1323	74.8963	74.8511	74.7999	74.788	74.9277	75.1498	74.9933	75.0427	74.6303
12	P. oceani	70.9262	71.0863	71.1057	69.2443	72.5789	73.3378	71.3252	73.7827	73.8539	77.9711	86.3298		82.0373	82.772	82.3849	75.1605	76.0864	76.4154	76.4205	74.7731	75.0407	75.371	75.338	75.3657	76.3305	76.1415	76.0019	75.5949	76.0153	76.1731	74.2513	74.478	74.4507	72.2882	72.3348	72.6074	72.7381	74.5283	75.0709	74.6183	74.7004	74.6022	74.6946	74.8394	74.9907	74.8357	74.9353	74.4166
13	P. pachastrellae	71.0731	71.1185	71.1261	69.7667	72.6486	73.2454	71.6849	74.0997	74.0774	78.4826	82.1531	81.9886		89.6422	89.4483	75.411	76.5602	76.7635	76.7427	74.9531	75.4579	75.7121	75.4841	75.6818	76.7951	76.6838	76.3979	75.9462	76.4164	76.6021	74.4786	74.4589	74.4293	72.2896	72.6192	72.681	72.9159	74.7388	75.3031	75.0457	74.9818	74.8911	75.0017	75.1726	75.3377	75.215	75.2462	74.7687
14	P. abyssi	71.1877	71.1155	71.3829	69.5354	72.9127	73.223	71.7267	73.899	73.9945	78.9479	82.529	82.8103	89.651		97.5423	75.2765	76.3508	76.5486	76.5596	74.9183	75.2474	75.5899	75.3754	75.4697	76.6281	76.2467	76.1251	75.6926	76.1433	76.4392	74.2726	74.3675	74.5314	72.4506	72.5151	72.9771	73.038	74.6523	75.261	74.9246	75.067	74.9572	74.9037	74.9835	75.3044	75.1244	75.1933	74.65
15	P. gallaeciencis	71.0369	70.9853	71.0673	69.0809	72.8273	73.2196	71.689	73.7906	73.9162	78.3698	83.0354	82.4172	89.4099	97.5755		75.3406	76.3689	76.7195	76.73	74.9121	75.3243	75.6332	75.5267	75.3522	76.6562	76.4474	76.13	75.857	76.2694	76.4665	74.5544	74.6223	74.4964	72.3483	72.4823	72.8139	72.8823	74.6614	75.2309	75.0188	75.073	75.0031	74.9198	75.0632	75.3636	75.1938	75.3431	74.7763
16	P. salegens	71.2496	71.3944	70.9131	69.9169	72.1464	73.2314	71.7235	73.4861	73.3208	75.227	75.4127	75.163	75.4656	75.3922	75.4281		76.1742	76.3749	76.2874	74.6881	75.4835	74.9135	74.9255	74.8148	75.8505	75.5844	75.4224	75.4843	75.4404	75.696	73.752	73.9098	73.6404	72.2328	72.421	72.4519	72.7561	74.0146	73.9631	73.8535	73.949	73.8097	74.0325	73.959	74.1096	73.8984	74.0214	73.8134
17	P. yangmingensis	70.6513	70.7658	70.8867	69.1439	72.5213	73.4986	71.5764	74.0654	73.9732	75.8029	76.453	76.0554	76.4447	76.4812	76.4648	76.072		78.0512	77.9736	75.0302	75.5074	75.6202	75.2899	75.3373	77.2041	76.8876	76.5429	76.0648	76.4647	76.691	74.6323	74.6659	74.7591	72.4329	72.3448	72.885	72.9304	75.1573	75.2155	74.9316	75.0301	74.9463	75.1494	75.2009	75.5043	75.3544	75.3796	75.068
18	P. phragmitis	71.446	71.2806	70.7902	69.9272	72.753	73.7786	71.8157	73.9558	74.0293	76.417	76.7457	76.4055	76.9098	76.7221	76.7622	76.3696	77.9782		98.7244	75.4401	75.7831	76.0876	75.6756	75.693	77.7454	77.2249	76.8272	76.3249	76.8504	77.0429	74.7741	74.9328	74.781	72.67	72.7259	72.9073	73.1426	74.9859	75.1409	75.0653	75.0654	74.8755	75.1737	74.936	75.3975	75.1521	75.28	74.9224
19	P. jilinensis	71.0885	70.8896	70.7256	69.1641	72.5643	73.5524	71.6386	73.8595	74.0644	76.3468	76.7012	76.3488	76.8276	76.6828	76.712	76.2069	77.9113	98.676		75.4623	75.8217	75.9893	75.6847	75.7067	77.6936	77.2952	76.7494	76.2635	76.8128	76.9749	74.5671	74.6021	74.6759	72.3781	72.4928	72.7653	72.9031	74.971	75.4489	74.8004	74.9197	74.8426	74.9891	74.8968	75.3201	75.2374	75.2343	74.8316
20	P. salina	70.6161	70.5213	70.5847	69.1285	71.9221	72.6083	70.9558	72.6301	72.9687	75.1485	75.0187	74.7663	75.0686	75.0104	75.0324	74.8465	75.1649	75.5396	75.5012		76.7276	74.9568	75.1018	75.1013	75.6044	75.2929	75.2047	75.1731	75.3315	75.5071	73.4827	73.6	73.6435	71.7632	72.1537	72.3417	72.3729	73.5673	73.6837	73.6812	73.6822	73.598	73.5469	73.612	73.7575	73.6723	73.7278	73.5835
21	P. pelagia	70.7118	70.7923	70.8985	69.1925	71.9522	72.6371	71.4645	72.7768	72.953	75.4475	75.2265	75.0812	75.3403	75.2661	75.3259	75.2563	75.4731	75.7288	75.8343	76.5386		74.934	75.2296	75.3564	75.6234	75.0566	75.0318	75.6257	75.5179	75.3824	72.9121	73.0799	73.2102	71.593	71.9231	72.0948	72.1908	73.3306	73.5262	73.331	73.3887	73.2754	73.4472	73.4217	73.5677	73.4488	73.567	73.2629
22	P. xinjiangensis	71.0598	70.9486	70.5211	69.3395	72.4889	73.4831	71.5354	73.6104	73.5679	75.561	75.7873	75.4933	75.7798	75.6757	75.6841	74.8692	75.7186	76.0858	76.0964	74.8956	75.0442		75.7692	75.6032	76.5051	76.0617	76.0892	75.7841	76.1253	76.2595	74.0756	74.2744	74.0827	72.1512	72.3997	72.4924	72.6427	74.6177	74.7746	74.638	74.5746	74.3922	74.4585	74.7009	74.6731	74.6152	74.8528	74.4123
23	P. profundi	70.1493	70.5885	70.6615	69.1294	72.0845	72.7028	71.1545	72.9723	72.8602	75.2303	75.3786	75.2123	75.4801	75.325	75.4448	74.6769	75.2636	75.5944	75.5937	74.988	75.2991	75.7147		84.8174	76.5667	75.9785	75.7235	76.9158	76.4187	75.9721	73.4423	73.5123	75.2392	71.7094	71.8095	72.2725	72.2207	73.7441	74.1157	73.9004	73.8467	73.8103	73.9323	74.6078	74.1375	74.0235	74.071	73.5091
24	P. saliphila	70.4907	70.8354	70.599	69.2315	72.0668	72.8827	71.0538	73.018	72.8957	75.1957	75.2529	75.2073	75.5461	75.4098	75.4409	74.6451	75.415	75.672	75.7061	74.8899	75.4833	75.5439	84.8524		76.3367	76.0793	75.7439	76.8626	76.3268	76.2171	73.5912	73.6637	73.5831	71.8135	71.9044	72.2279	72.3961	73.7443	73.9867	73.811	73.8651	73.7932	73.8095	73.8137	73.9576	73.9692	74.0327	73.7413
25	P. xiamenensis	70.9753	70.7661	70.8593	68.6878	72.5974	73.7544	71.7607	74.6319	73.925	76.393	76.6861	76.2923	76.8697	76.6426	76.6273	75.8507	77.2281	77.7067	77.6624	75.4754	75.6917	76.4275	76.5309	76.3815		81.951	81.3675	81.3603	82.7661	82.0067	75.1441	75.3406	75.6449	72.2993	72.3476	72.7123	72.7717	75.7399	76.1578	75.5976	75.6855	75.6218	75.764	76.2331	76.3966	76.2957	76.3539	75.6747
26	P. formosensis	71.1557	70.7453	70.6245	68.9232	72.6979	73.7278	71.6008	74.4476	73.9092	75.9298	76.6358	76.1563	76.7138	76.3663	76.6431	75.4982	77.0345	77.301	77.4153	75.1562	75.3785	76.1019	76.0389	76.0868	81.9264		82.0835	78.9984	80.6607	80.495	75.3637	75.7039	75.4751	72.3908	72.4838	72.8002	72.9416	75.718	76.1931	75.5846	75.6584	75.6056	75.586	75.6775	76.3124	76.2105	76.2113	75.715
27	P. pertucinogena	70.807	70.7142	70.6121	68.9752	72.4501	73.226	71.4018	74.268	73.6273	75.7498	76.1397	75.9009	76.2036	76.0733	76.0679	75.3352	76.6118	76.7848	76.7033	74.9615	75.2078	75.8711	75.6941	75.5982	81.3911	82.0087		78.9943	79.7457	80.2667	74.9564	75.1184	74.9952	72.2058	72.3237	72.7585	72.8721	75.2057	75.6632	75.2898	75.3218	75.2576	75.2024	75.3659	75.7955	75.7519	75.8311	75.234
28	P. litoralis	71.3312	71.2286	71.058	69.8374	72.701	73.4442	71.4238	73.8287	73.6503	75.723	76.0175	75.75	75.9942	75.8971	76.0255	75.5852	76.2876	76.4545	76.4741	75.1466	76.1115	75.7724	77.0078	77.1703	81.4027	79.1125	78.9954		82.7926	81.8239	74.0666	74.3366	74.1014	72.1357	72.1526	72.463	72.767	74.4255	74.7333	74.5743	74.6648	74.4384	74.5122	74.6517	74.8312	74.6507	74.8419	74.4488
29	P. bauzanensis	70.9531	70.8946	70.8632	69.0893	72.6355	73.1622	71.4033	74.0263	73.5206	75.856	76.2687	75.9758	76.3488	76.2935	76.3343	75.4027	76.4613	76.8349	76.9021	75.2334	75.7364	75.9085	76.3778	76.3516	82.7841	80.6623	79.7301	82.7544		83.9718	74.5527	74.7371	74.8517	72.1497	72.1812	72.6607	72.6849	74.964	75.1574	75.0805	75.1075	75.0388	74.9792	75.0232	75.3644	75.381	75.4423	74.9235
30	P. saudimassiliensis	71.2109	71.2856	70.8444	69.6727	72.8991	73.644	71.7125	74.4082	74.0788	76.1657	76.5706	76.2606	76.6706	76.7036	76.6495	75.7371	76.7668	76.9885	77.035	75.4569	75.595	76.2021	76.0992	76.2497	82.0377	80.5412	80.1938	81.7451	84.0022		75.0302	75.3585	75.0986	72.3489	72.484	72.6644	72.9055	75.6438	75.8895	75.6687	75.7193	75.6122	75.4186	75.5717	76.1374	75.8371	76.0948	75.6585
31	P. rhizoryzae	70.8448	70.6264	70.5868	68.8546	72.9017	74.5759	71.9857	74.5126	74.3034	74.0243	74.2631	74.2025	74.4457	74.3589	74.4221	73.6764	74.8344	74.4988	74.4857	73.326	73.0256	73.9987	73.2372	73.3978	75.0573	75.235	74.9012	73.8621	74.4498	74.8768		88.5652	88.4178	73.8079	73.7337	74.3627	74.4557	77.4386	77.9749	77.2823	77.4082	77.3355	77.6756	77.6103	78.276	78.1114	78.0318	77.5933
32	P. oryzihabitans	70.7659	70.3619	70.4859	68.8129	72.8815	74.6706	72.0484	74.6904	74.527	74.04	74.4352	74.5169	74.6486	74.5567	74.5456	73.8685	74.6888	74.7559	74.681	73.5209	73.3058	73.9429	73.6099	73.6167	75.2982	75.5408	75.2502	74.0915	74.6936	75.0702	88.6173		98.3105	73.9086	73.7855	74.5448	74.5379	77.9037	78.2963	77.5454	77.6562	77.6035	77.9508	77.7409	78.6113	78.6179	78.4134	77.9285
33	P. psychrotolerans	70.4183	70.1687	70.5594	68.2485	72.676	74.3165	71.7412	74.7243	74.3022	73.7735	74.2427	74.2415	74.5295	74.5733	74.3486	73.38	74.503	74.5775	74.5757	73.3683	73.2134	73.7465	75.2308	73.358	75.6137	75.2993	75.0325	74.1052	74.8633	74.9865	88.4339	98.1344		73.7339	73.6599	74.3889	74.4633	77.5477	78.0014	77.3166	77.4349	77.3826	77.683	77.9563	78.3888	78.3137	78.2152	77.6951
34	P. duriflava	70.4083	71.249	70.9164	70.3766	72.0498	72.6694	70.6663	72.0986	72.4388	72.1235	72.4379	72.2911	72.4839	72.3458	72.3677	72.1342	72.3665	72.4757	72.4429	71.865	71.8232	72.1591	71.9511	71.8875	72.1481	72.4162	72.2015	71.9728	72.0854	72.2408	73.9316	73.9752	73.916		76.253	76.9049	76.682	73.27	73.3382	73.2783	73.288	73.1717	73.3486	73.3603	73.3592	73.2606	73.3875	73.0523
35	P. asuensis	70.5584	70.8791	70.9554	70.1518	72.0885	72.4143	70.6755	72.3742	72.3706	72.2819	72.6254	72.4976	72.6014	72.5384	72.528	72.2286	72.57	72.4375	72.4518	71.9256	71.8377	72.1607	71.9383	71.8761	72.2721	72.3199	72.2743	72.2193	72.26	72.3491	73.6368	73.7378	73.724	76.2235		84.641	84.6586	73.0639	73.2621	73.2436	73.2847	73.2353	73.3191	73.2228	73.3784	73.2885	73.3284	72.9268
36	P. zeshuii	70.492	70.6319	70.9476	69.7674	72.1989	72.8773	70.756	72.8505	72.8537	72.5199	72.8623	72.6951	72.9449	73.091	72.8994	72.6388	73.0902	72.8131	72.8572	72.189	72.281	72.5183	72.3338	72.332	72.6739	72.7018	72.7105	72.453	72.6202	72.7289	74.3216	74.4903	74.5232	76.7905	84.5829		97.8594	73.7925	73.9848	73.929	74.0294	73.969	74.0013	74.0196	74.0672	74.0786	74.0939	73.6558
37	P. luteola	70.503	70.8424	70.9778	69.6791	72.2063	72.8801	70.9014	72.7662	72.8022	72.4471	72.76	72.6222	72.7965	72.8576	72.6604	72.5739	72.9296	72.7662	72.7617	72.2528	72.227	72.3993	72.2996	72.332	72.6421	72.6846	72.7279	72.5359	72.6781	72.8047	74.4494	74.5224	74.5143	76.5976	84.6316	97.8918		73.8271	74.0384	73.9595	73.976	73.8527	73.9306	73.9941	73.9548	73.9076	73.9951	73.7444
38	P. aeruginosa	71.1109	71.174	70.8088	69.739	73.1054	75.4456	72.5127	75.218	74.8029	74.3875	75.0665	74.7821	75.0377	74.8719	74.9047	74.2348	75.4468	74.9587	74.9988	73.7924	73.6479	74.6357	73.9529	73.9816	75.8744	75.7684	75.532	74.4869	75.1126	75.6691	77.5989	77.9239	77.803	73.4572	73.3557	73.8417	74.0068		82.277	80.8641	81.0183	80.9395	81.6747	81.4323	82.3445	82.2708	82.2626	79.3465
39	P. jinjuensis	70.7626	70.6132	70.7065	68.6512	72.9597	75.4057	72.4624	75.0305	74.9773	74.4255	75.1565	74.8392	75.186	75.165	75.0633	73.7288	75.0243	74.8678	75.2214	73.6368	73.5211	74.5696	73.8999	73.9524	75.8527	75.7287	75.5782	74.487	75.0938	75.5813	77.8183	78.2225	78.244	73.2455	73.2613	73.9514	74.0023	82.16		83.0865	83.1915	83.1769	83.7901	83.5816	84.6747	84.5936	84.7395	79.7265
40	P. nicosulfuronedens	70.9841	70.8505	70.8768	68.6959	73.0434	74.7837	72.2448	75.0088	74.7943	74.285	74.8812	74.645	75.0598	74.9413	74.912	73.7731	74.8651	74.7534	74.7663	73.5422	73.5152	74.2113	73.6983	73.8052	75.5033	75.3582	75.2661	74.3921	74.8896	75.2405	77.151	77.3685	77.2608	73.1522	73.1678	73.807	73.8536	80.57	82.9831		91.099	90.6368	82.5212	82.9044	83.6528	83.6119	83.6689	78.5477
41	P. nitritireducens	71.0293	70.717	70.9328	68.8873	73.0081	74.9463	72.3144	74.8651	74.8931	74.2923	74.9557	74.6627	75.0123	75.0101	74.9167	73.7688	74.9186	74.8843	74.8402	73.6388	73.66	74.4822	73.696	73.9004	75.6167	75.5085	75.4265	74.3974	74.9941	75.3095	77.2762	77.622	77.5806	73.2451	73.2355	73.8813	73.9367	80.8314	83.2559	91.2043		98.8364	82.722	83.0906	84.0227	84.0145	84.0235	78.8677
42	P. nitroreducens	70.8182	70.6138	70.861	68.6161	72.9249	74.9318	72.1924	74.8614	74.9516	74.4377	74.9016	74.6795	75.1401	74.9912	74.9704	73.7491	74.9181	74.8523	74.8532	73.5925	73.6587	74.4724	73.8959	74.0513	75.7542	75.5297	75.4972	74.4568	75.2257	75.4139	77.1961	77.5212	77.5608	73.2151	73.2314	73.8186	73.8349	80.9104	83.3073	90.8051	98.8488		82.7593	83.0752	83.9112	83.9161	83.9364	78.9147
43	P. panipatensis	71.1305	70.8008	70.8011	69.2222	72.8922	75.3351	72.2502	74.9421	74.8395	74.2661	74.7965	74.5631	74.9852	74.9117	74.8912	73.8809	75.1622	75.0304	75.0423	73.5688	73.5796	74.3875	73.8744	73.912	75.6464	75.2651	75.2967	74.4577	75.0675	75.3821	77.564	77.8939	77.8096	73.374	73.3448	74.0003	74.0781	81.5735	83.9657	82.7436	82.8746	82.8181		85.0782	86.2252	86.1745	86.1872	79.2126
44	P. knackmussii	71.3261	71.275	70.8241	69.7667	73.3321	75.2524	72.6722	75.1341	75.0091	74.5799	75.1599	74.8891	75.2766	75.0449	75.1103	73.9033	75.2202	74.812	74.8701	73.6434	73.8149	74.6541	75.111	74.0793	76.7126	75.5594	75.6378	74.642	75.1928	75.5909	77.5089	77.8109	78.1638	73.4149	73.3432	73.9297	74.0935	81.2288	83.6863	82.9843	83.137	83.0318	85.0234		87.2073	87.2277	86.9929	79.112
45	P. delhiensis	71.0644	70.6308	70.6758	68.8385	73.0984	75.2293	72.502	75.1738	75.0593	74.5955	75.0559	74.8543	75.2994	75.2507	75.1983	74.0008	75.4273	75.124	75.1637	73.7688	73.68	74.5525	73.9257	74.0993	76.1382	76.0252	75.876	74.7104	75.319	75.9288	78.0031	78.3568	78.3218	73.2243	73.2	73.954	73.9167	82.1149	84.4658	83.557	83.7877	83.7513	85.9349	86.9732		94.4757	94.302	80.1674
46	P. citronellolis	70.5758	70.4259	70.7583	68.7359	73.036	75.0743	72.3785	75.1545	75.027	74.4036	74.9772	74.8256	75.1568	75.0305	75.0139	73.7603	75.2393	75.0002	75.0947	73.5907	73.608	74.5041	73.7901	73.958	76.1419	75.8731	75.7829	74.5307	75.3794	75.7253	77.8574	78.2286	78.1514	73.1795	73.1643	73.8537	73.8666	81.9703	84.2892	83.5123	83.8256	83.7492	85.8924	86.9669	94.3001		96.5623	79.9169
47	P. humi	71.5946	71.2154	70.6791	70.6606	73.4396	75.541	72.7776	75.301	75.3591	74.7707	75.2693	75.0913	75.5432	75.432	75.4446	74.0643	75.536	75.2888	75.3408	73.8908	73.9729	74.9018	74.1025	74.217	76.283	76.1941	76.0091	74.7032	75.5363	76.0846	77.9966	78.3496	78.162	73.4343	73.4156	73.979	74.2108	82.1018	84.6077	83.7727	83.9457	83.8833	86.0098	87.0145	94.2791	96.8397		80.1544
48	P. mangiferae	70.9309	70.6992	70.6587	68.9141	72.9971	75.2837	72.302	74.9947	74.5683	74.2754	74.8549	74.5001	74.8677	74.8095	74.8719	73.6636	75.2287	74.814	74.8349	73.4753	73.5142	74.2486	73.5914	73.6884	75.7644	75.7391	75.4477	74.2582	74.9395	75.419	77.606	77.9127	77.8843	72.9374	72.925	73.5692	73.6419	79.3183	79.949	78.8309	79.0235	79.0273	79.3806	79.3939	80.4476	80.3755	80.309
49	P. otitidis	70.9131	70.6362	70.902	68.8104	73.0596	75.3456	72.1546	74.9986	74.6751	74.3966	75.5008	75.0247	75.149	75.4382	75.5792	73.7169	75.1624	74.8057	74.8058	73.5896	73.5044	74.1853	74.0045	73.8438	75.6058	75.5626	75.4417	74.4425	75.0476	75.5577	77.5203	77.9094	77.8763	73.2769	73.2088	73.867	73.8595	79.7912	80.7123	79.7035	79.8164	79.7872	79.9687	80.0421	81.1106	81.0298	80.9816	80.1257
50	P. furukawaii	71.4444	71.0764	70.7408	70.3599	73.2388	75.5267	72.3797	74.9491	74.8079	74.432	75.3369	74.8966	75.0742	75.0818	75.2763	73.8017	75.1912	74.85	75.0672	73.5666	73.7809	74.2626	73.9122	73.881	75.5902	75.4293	75.4434	74.3618	74.9887	75.4369	77.5192	77.7212	77.573	73.3069	73.2955	73.8839	74.0015	79.7604	80.3403	79.4258	79.551	79.4066	79.7236	79.6553	80.7802	80.6005	80.6307	80.1619
51	P. resinovorans	70.6175	70.8323	71.0938	68.8622	73.0884	74.9862	72.0006	74.7745	74.6224	73.8848	74.543	74.3591	74.6732	74.5957	74.5361	73.6756	74.7792	74.5285	74.6872	73.406	73.2483	73.952	73.6063	73.573	75.053	74.9028	74.9746	74.1849	74.5891	74.8197	77.0448	77.2347	77.1887	73.2963	73.2238	73.7533	73.8301	78.898	79.5754	78.7756	78.9474	78.833	79.1965	79.1754	79.8965	79.821	79.7448	79.2466
52	P. lalkuanensis	71.5225	71.3924	71.0588	70.422	73.2899	75.5963	72.5558	75.2186	75.0573	74.4533	75.0372	74.8301	75.1105	75.0118	74.9775	74.0716	75.0627	74.7463	74.7365	73.8131	73.8001	74.4855	73.9414	74.0115	75.6513	75.4506	75.4635	74.5822	75.1594	75.5672	77.459	77.8472	77.6864	73.4315	73.4607	74.0065	74.138	79.6778	80.3525	79.5992	79.6644	79.5404	79.8309	79.9127	80.7047	80.535	80.6059	79.8845
53	P. indica	71.1642	70.7338	71.0831	69.3271	73.0229	75.7807	72.3219	75.0231	74.8972	74.179	74.6117	74.4519	74.6896	74.8839	74.7109	73.773	74.9658	74.8212	75.3347	73.5268	73.7748	74.3493	73.9023	73.8776	75.4683	75.2832	75.0732	74.2523	74.876	75.1498	77.1406	77.2778	77.2421	73.3155	73.3704	73.9977	74.0229	79.219	79.8117	78.7919	78.8505	78.8207	79.2289	79.1623	79.7081	79.7757	79.6745	79.3784
54	P. kuykendallii	70.6134	70.6283	70.8994	68.7768	72.7699	75.3698	72.3802	74.7552	74.8565	74.2026	74.7153	74.4106	74.7697	74.6593	74.6486	73.7177	74.8268	74.6276	74.6243	73.4983	73.6798	74.4794	73.751	73.7499	75.5777	75.3728	75.2382	74.2685	74.9747	75.1987	77.0692	77.4473	77.279	72.8723	72.8083	73.4821	73.4496	79.1981	79.9352	78.8182	79.0192	78.9879	79.2791	79.2704	80.0559	79.9928	79.9276	79.6412
55	P. matsuisoli	70.4002	70.7037	70.8913	69.2098	72.2704	73.6286	71.4986	73.203	73.4892	72.9498	73.1928	73.0791	73.3286	73.35	73.2438	72.6555	73.0838	73.2434	73.2066	72.4206	72.4953	72.9794	72.4522	72.7041	73.4516	73.3563	73.3907	72.7497	73.1797	73.3145	74.4169	74.5676	74.4963	72.777	72.6162	72.9469	73.0857	75.2671	75.4473	75.3059	75.345	75.2753	75.4322	75.3607	75.3694	75.3276	75.4316	75.3341
56	P. azotifigens	70.6759	70.5444	70.6481	68.913	72.8661	75.9704	72.3264	74.9759	74.8663	74.3681	75.0068	74.8672	75.2396	75.1619	75.0123	73.6192	75.3038	75.0827	75.1036	73.5469	73.7015	74.6024	74.0572	73.9819	75.787	75.6511	75.3976	74.4423	74.8671	75.4471	77.2361	77.4742	77.3513	72.8999	72.7857	73.4929	73.6216	79.0955	79.5712	78.4413	78.575	78.5557	79.1109	78.9993	79.9828	79.8627	79.825	79.3604
57	P. urumqiensis	70.4785	70.6725	70.7833	68.9717	72.5622	75.1459	72.034	74.3048	74.1028	73.7983	74.3152	73.9072	74.2165	74.2918	74.2681	73.24	74.3226	74.2359	74.2145	73.0491	73.153	74.0314	73.4381	73.5044	75.0037	74.7206	74.6313	73.7657	74.2863	74.5979	76.1211	76.3616	76.3424	72.7567	72.6774	73.2274	73.2623	77.5046	77.8114	77.2548	77.3091	77.278	77.4472	77.5235	77.9646	77.938	77.9197	77.4174
58	P. nosocomialis	70.6937	70.8566	70.9848	68.8873	72.9683	75.8292	72.22	74.8912	74.6708	74.3122	74.869	74.7383	74.9168	74.899	74.7856	73.6939	74.9625	74.8735	74.9291	73.6218	73.4735	74.4966	73.86	73.9564	75.5241	75.5281	75.1806	74.3512	74.9239	75.3702	76.7884	76.966	77.7624	72.9815	72.9608	73.6354	73.705	78.427	78.9721	78.077	78.1553	78.1088	78.3967	78.327	79.1024	79.0742	78.9515	78.7216
59	P. kirkiae	70.8763	70.889	71.0038	69.0098	72.9165	75.9243	72.512	75.0754	74.7425	74.4019	74.8223	74.4856	74.8806	74.8155	74.7642	73.8616	75.3423	75.1667	75.1458	73.7301	73.5485	74.4685	73.8942	74.0847	75.8082	75.6544	75.4471	74.6957	75.2679	75.4783	77.1843	77.2632	77.1791	73.1622	73.1903	73.7865	73.8612	78.2493	78.7418	77.776	78.047	77.9711	78.4796	78.3098	78.6595	78.4668	78.541	78.7051
60	P. nitrititolerans	70.8396	70.914	71.1915	69.0411	72.9757	75.9759	72.3116	74.8665	74.9103	74.1581	74.9649	74.7483	75.0185	74.8255	74.9163	73.7513	75.0175	75.0098	75.0845	73.6671	73.8426	74.4135	73.9974	74.182	75.8358	75.5783	75.3856	74.5141	75.2738	75.4381	76.6772	76.8535	76.8671	73.1421	73.1217	73.6293	73.7094	78.2345	78.7278	78.0321	78.1398	78.1405	78.2579	78.3682	78.7891	78.781	78.8237	78.4011
61	P. saudiphocaensis	70.7008	71.2353	71.407	68.9323	73.084	75.3862	71.9452	74.7192	74.528	74.0295	74.5403	74.3866	74.588	74.4713	74.4426	73.6178	74.5776	74.5983	74.6217	73.4582	73.5023	73.9874	73.7271	73.7814	75.1649	74.9804	74.9134	74.3746	74.7872	74.7709	76.0186	76.3025	76.2485	73.0331	73.0055	73.5484	73.6108	77.2479	77.6872	77.0687	77.2183	77.1922	77.199	77.1704	77.6992	77.6517	77.7019	77.2827
62	P. zhaodongensis	70.2392	70.6349	71.0215	69.3351	72.3863	74.4485	71.3443	73.4866	73.5138	73.0707	73.386	73.2954	73.4604	73.3877	73.3258	72.7446	73.4323	73.4789	73.4626	72.7168	72.6764	73.2553	72.8818	72.9571	73.8501	73.7944	73.6942	73.3683	73.5305	73.7736	74.676	74.697	74.6834	72.6709	72.6619	72.9874	73.0238	75.6186	76.0341	75.619	75.7285	75.6695	75.8679	75.8253	75.9762	75.9602	75.9728	75.7233
63	P. xanthomarina	71.1732	71.3857	71.3995	70.1316	72.8669	74.9247	72.0497	74.1902	74.1417	73.8321	74.2678	74.3196	74.3444	74.3653	74.2439	73.721	74.1728	74.4076	74.3209	73.3238	73.309	73.8978	73.5477	73.515	74.5008	74.3875	74.2668	74.0466	74.32	74.4722	75.2594	75.3716	75.1923	72.9397	73.0554	73.2276	73.4826	76.3487	76.7071	76.2722	76.338	76.1787	76.4116	76.511	76.5722	76.5188	76.6552	76.4172
64	P. balearica	71.3683	71.2762	70.9692	70.0255	73.0369	75.8486	72.5133	74.8942	74.727	74.1773	74.8232	75.0316	74.8894	75.2167	74.8181	73.9972	75.1614	74.9312	75.1663	73.4176	73.8521	74.4942	74.2834	74.1407	75.6333	75.4652	75.3164	74.4228	75.179	75.3472	76.4737	76.6799	76.6674	73.0769	73.0143	73.5249	73.7864	78.1257	78.3859	77.7112	77.8666	77.7669	78.1567	78.063	78.6169	78.5669	78.5748	78.0583
65	P. stutzeri	71.1712	71.2944	71.0356	69.6549	73.1306	76.0944	72.2571	75.2591	75.0256	74.3285	75.0477	74.8123	75.2989	74.9997	74.9755	74.074	75.5916	75.061	75.6767	73.6374	73.8495	74.4868	74.1869	74.3785	75.5665	75.3288	75.3155	74.6118	75.0866	75.3949	76.6475	76.951	76.9178	73.1559	73.1582	73.7561	73.9537	78.4486	78.8414	78.1838	78.2951	78.1853	78.3867	78.4024	79.0399	78.926	78.9689	78.5888
66	P. songnenensis	70.6258	70.9335	71.1391	69.0702	72.9078	75.6972	71.9867	74.6045	74.6961	74.0674	74.5583	74.3162	74.5115	74.6336	74.5757	73.6575	74.7794	74.6933	74.665	73.2897	73.4026	74.172	73.7439	73.7839	75.2635	75.0647	74.8662	74.2681	74.7125	74.838	76.2814	76.4003	76.3464	72.9553	73.0228	73.6299	73.7144	77.7088	78.221	77.5503	77.6607	77.6103	77.7542	77.7357	78.2659	78.264	78.2357	77.7114
67	P. perfectomarina	70.7099	70.9179	71.1822	69.3308	72.7372	75.3868	71.7282	74.3247	74.3144	73.8776	74.5932	74.3417	74.6606	74.3951	74.4098	73.551	74.8324	74.3484	74.5675	73.2125	73.3428	73.9045	73.6005	73.5685	74.6585	74.6015	74.4922	74.0449	74.3666	74.5132	75.7691	75.7742	75.7391	72.8551	72.9603	73.469	73.5237	77.0308	77.4517	76.9336	76.9879	76.8859	77.1411	77.0441	77.3912	77.423	77.4773	77.0832
68	P. kunmingensis	70.5329	70.7013	71.0042	69.0889	72.7078	75.4905	71.9197	74.5953	74.445	74.001	74.4939	74.6228	74.8272	74.7313	74.5358	73.5345	74.7677	74.6925	74.7444	73.2499	73.6178	74.2085	74.3745	73.8341	75.6209	75.0299	74.6964	74.3004	74.5638	74.7635	76.0431	76.2018	76.5587	72.9506	72.9018	73.6098	73.532	77.6477	78.2209	77.4033	77.4432	77.3922	77.6447	77.8425	78.1213	78.1859	78.088	77.7397
69	P. chloritidismutans	71.1197	71.2559	71.1948	70.0369	73.1013	75.8538	72.1858	74.6325	74.7987	74.1921	74.8464	75.0235	74.953	74.9435	74.8147	73.8375	75.34	74.865	75.0957	73.5628	73.9931	74.3963	74.1211	73.9782	75.3004	75.0472	74.9425	74.6105	74.8193	75.0903	76.2313	76.5022	76.4097	73.1606	73.2183	73.6713	73.8649	77.8001	78.3373	77.5965	77.615	77.4746	77.8488	77.8814	78.2754	78.1998	78.3033	78.0178
70	P. thermotolerans	70.8047	70.346	70.572	68.6281	72.9309	75.3993	72.7432	75.0678	74.877	74.435	75.3647	75.0568	75.0686	75.3212	75.2658	73.7378	75.6369	75.1164	75.1289	73.5611	73.6519	74.5497	73.8219	73.9845	76.005	75.8124	75.6516	74.386	75.1355	75.6006	77.8438	78.3064	78.3174	72.9872	72.9975	73.7699	73.7149	80.1046	80.9135	79.4768	79.5309	79.5025	79.9268	79.9312	81.362	81.2178	81.2859	80.5611
71	P. tuomuerensis	70.9605	70.8485	70.8641	68.8951	73.3481	75.3408	72.2341	75.2561	75.0514	74.3905	74.7816	74.6099	74.9327	74.9215	74.909	73.6417	75.1984	74.7249	74.8105	73.5173	73.6066	74.3062	73.7855	73.975	76.0017	75.7288	75.4757	74.4682	75.2003	75.5062	77.1485	77.3923	77.2477	73.0017	72.9521	73.5706	73.6716	78.6174	79.3198	78.5044	78.5758	78.5382	78.4722	78.4801	79.6278	79.4419	79.5385	79.091
72	P. flexibilis	70.8881	70.7648	70.9396	68.7752	73.0768	75.309	72.1538	75.3186	74.8189	74.3897	74.9116	74.5866	75.0065	74.9384	74.9666	73.7902	75.1656	74.8353	74.8332	73.4788	73.5675	74.3398	73.7157	73.7949	76.0236	75.63	75.5332	74.4654	75.2478	75.6157	77.2035	77.5495	77.3556	73.1382	72.9596	73.5631	73.6813	78.5755	79.2972	78.537	78.5277	78.5719	78.6133	78.6076	79.6845	79.4501	79.5207	79.1516
73	P. guangdongensis	71.804	71.204	70.8936	70.2702	73.5593	75.8972	72.8496	75.8458	75.7499	75.2077	75.7549	75.5277	75.8	75.7721	75.8199	74.5124	76.1478	75.7568	75.8794	74.2496	74.2009	75.2618	74.6495	74.5643	76.5787	76.342	76.3053	75.2355	75.7778	76.1414	78.3563	78.6554	78.4841	73.3994	73.3133	73.8873	74.1404	80.5016	80.8951	79.6733	79.8184	79.6076	79.8429	79.9971	81.2999	81.0603	81.3106	80.0836
74	P. oryzae	72.1291	71.5201	70.7562	71.0021	73.72	75.9518	72.9279	75.7829	75.7844	75.1	75.6029	75.4826	75.8263	75.7386	75.799	74.5908	76.0466	75.7696	75.8949	74.1906	74.1905	75.2178	74.5446	74.4821	76.5828	76.3343	76.3801	75.1361	75.733	76.0355	78.3109	78.8032	78.5162	73.5267	73.7114	74.1221	74.3108	80.2458	80.6822	79.7142	79.8069	79.5876	80.0902	80.0272	81.1745	80.8643	81.0967	79.8491
75	P. sagittaria	71.1427	70.9076	70.9022	69.0432	73.1068	75.5783	72.4912	75.6366	75.3834	74.8394	75.3537	75.1111	75.5061	75.4223	75.4697	74.0415	75.8079	75.4839	75.5438	73.928	73.933	74.9071	74.1235	74.0604	76.3768	76.1422	76.1374	74.9386	75.509	75.8843	77.9091	78.4284	78.3169	73.212	73.2621	73.9379	74.0084	79.8508	80.4188	79.3857	79.6167	79.4736	79.7528	79.6566	80.836	80.7237	80.6465	79.7372
76	P. linyingensis	71.1013	70.5443	70.8716	68.8491	72.9734	75.4507	72.2202	75.5491	75.3804	74.6108	75.1402	74.9279	75.3665	75.2731	75.3245	73.9601	75.4375	75.1926	75.3657	73.733	73.7189	74.6657	73.9307	73.9752	76.1817	75.9712	75.8942	74.7737	75.2628	75.5791	77.965	78.2561	78.3603	73.1599	73.1079	73.8506	73.9137	79.7466	80.2779	79.2555	79.3185	79.3344	79.4974	79.5285	80.605	80.463	80.4535	79.5115
77	P. mangrovi	71.5291	71.1974	70.9553	69.8275	73.3594	75.2543	72.4408	75.0521	75.161	74.498	75	74.7971	74.9157	74.9072	74.9539	73.9992	75.3836	75.2741	75.2106	73.7343	73.9331	74.6622	73.901	74.0218	75.8336	75.7785	75.4922	74.7928	75.2121	75.6649	77.0215	77.1836	77.0327	73.0614	73.1153	73.6214	73.7915	78.3489	78.6634	77.9421	78.2002	77.9097	78.3579	78.4253	78.9837	78.8416	78.88	78.498
78	P. pohangensis	71.2747	71.2748	71.4256	69.9658	73.1202	74.7238	72.1039	74.703	74.5414	74.0366	74.5432	74.3701	74.4683	74.3356	74.5398	73.9046	74.8226	74.5894	74.6182	73.6156	73.6121	73.8839	73.6926	73.6291	74.844	74.5933	74.5463	74.0737	74.4632	74.669	75.7771	75.9804	75.7695	73.0161	73.1434	73.4837	73.6218	76.8523	76.9618	76.4688	76.6155	76.46	76.779	76.6807	76.993	76.9245	76.9809	76.8411
79	P. alcaligenes	70.8675	70.8006	70.9853	68.8256	73.0197	75.5369	72.5846	75.4341	75.5869	74.5814	75.2514	75.0259	75.3572	75.3764	75.4282	73.784	75.7015	75.2417	75.3073	73.7591	73.7668	74.4929	74.0789	74.219	76.044	75.8579	75.6589	74.7479	75.2325	75.6082	77.5509	77.9471	77.9553	73.2116	73.268	74.0992	74.0843	79.5393	80.464	79.4235	79.5442	79.4492	79.6558	79.7534	80.7517	80.6274	80.6214	79.9459
80	P. pharmacofabricae	71.5697	71.4634	71.2322	69.7629	73.3484	75.0136	72.0908	74.8903	74.8673	74.1857	74.7441	74.5072	74.7986	74.8276	74.7372	74.0047	75.1415	74.8621	74.9482	73.5491	73.7501	74.2714	73.916	73.688	75.2306	75.0693	74.9562	74.3325	74.6716	74.9771	76.3007	76.5822	76.3756	73.3915	73.3972	73.6551	73.8508	77.5198	77.9046	77.3743	77.4727	77.3283	77.6219	77.5265	78.1813	77.9456	78.2297	77.8423
81	P. fluvialis	71.0397	71.0988	71.3411	69.195	73.0468	75.0467	72.1576	74.7453	74.8343	74.2095	74.703	74.4524	74.6048	74.7334	74.7573	73.8504	75.3782	74.7841	74.8006	73.4721	73.4307	74.0659	73.7545	73.6622	75.2079	74.9891	74.9063	74.2664	74.6743	74.8293	76.4312	76.5961	76.5107	73.3641	73.2831	73.6982	73.8093	77.5716	77.7709	77.2153	77.3239	77.2574	77.5547	77.5124	78.0902	78.0251	78.0141	77.6826
82	P. khazarica	70.7038	70.7431	71.0217	68.7946	72.9758	75.3917	72.4375	75.0999	75.3097	74.2409	74.7448	74.5287	74.8786	74.8639	74.7829	73.583	74.9044	74.9484	75.0105	73.5509	73.4928	74.4276	73.6636	73.8653	75.7333	75.6057	75.4058	74.4913	74.9962	75.3944	77.1224	77.4053	77.3	73.1076	73.1011	73.7951	73.7688	79.0269	79.7748	78.6969	78.957	78.8814	79.2652	79.1415	79.8704	79.8478	79.8177	79.1553
83	P. mendocina	71.0567	70.942	71.1139	68.8616	72.9033	75.185	72.1327	74.7588	75.0216	74.3081	74.694	74.5247	74.9712	74.873	74.8049	73.6621	74.7702	74.842	74.7686	73.3846	73.5357	74.2192	73.6779	73.6847	75.4651	75.1906	75.0497	74.2674	74.7919	75.1045	76.5597	76.7361	76.7338	73.0402	72.9593	73.5125	73.5813	78.1374	78.8985	78.0578	78.2393	78.1725	78.4641	78.4277	78.8435	78.8602	78.9035	78.3005
84	P. guguanensis	70.8034	70.9214	71.0162	68.9175	72.9699	75.4592	72.3852	75.1355	75.3273	74.3213	75.1717	74.9784	75.0538	75.3138	75.2597	73.9106	75.3357	75.1611	75.1475	73.4954	73.596	74.4381	73.8811	73.9404	75.8882	75.6437	75.4409	74.4644	75.0405	75.4131	77.3419	77.5672	77.4638	73.2768	73.1126	73.7851	73.8004	78.9522	79.7502	78.8849	79.0756	78.9993	79.2719	79.1346	79.8742	79.8475	79.8859	79.1546
85	P. composti	70.7321	71.0789	71.2747	69.1565	72.7994	74.9861	72.1486	74.7743	74.9472	74.1878	75.1502	74.8169	74.7999	74.991	75.2022	73.719	74.6342	74.8922	74.7792	73.4296	73.5926	74.1966	73.635	73.7497	75.3733	75.198	74.9212	74.1323	74.6727	74.8718	76.3751	76.5901	76.4917	73.0739	72.995	73.496	73.5014	77.9965	78.6492	77.923	78.0905	78.0514	78.4035	78.2763	78.7281	78.6284	78.673	78.1104
86	P. sediminis	70.9167	71.1032	71.2877	68.9995	72.8581	74.9683	72.2809	74.7958	75.0097	74.0893	74.4768	74.3742	74.7197	74.6442	74.6043	73.6259	74.7666	74.7891	74.636	73.4701	73.4265	73.9968	73.6249	73.8071	75.3051	75.1071	74.9749	74.2911	74.5918	74.9654	76.5601	76.7494	76.6503	73.0313	72.8961	73.5221	73.5683	78.1516	78.7542	78.0413	78.1366	78.1063	78.4276	78.2825	78.7778	78.7388	78.7805	78.1933
87	P. alcaliphila	71.052	71.084	71.3082	69.1579	72.9175	75.0935	72.4033	75.0106	75.0525	74.3215	74.9299	74.5465	74.952	74.8038	74.817	73.6665	75.0274	75.0072	74.9995	73.5453	73.614	74.2866	73.9119	73.8309	75.4607	75.3237	75.2619	74.4387	74.9334	75.1553	76.8146	76.9635	76.9585	73.1423	73.0407	73.7083	73.7583	78.3832	79.0519	78.3192	78.5102	78.4513	78.7615	78.6738	79.1479	79.1653	79.134	78.4176
88	P. chaetoceroseae	70.7516	71.0419	71.2931	69.0319	72.808	75.1432	72.2961	74.8009	74.9591	74.2113	75.0183	74.7862	74.7597	75.0528	75.1083	73.6042	74.8535	74.9781	74.7966	73.516	73.4792	74.1557	73.8259	73.6036	75.4145	75.3173	75.095	74.4094	74.8271	75.0364	76.6837	76.9374	77.0134	73.1725	73.0323	73.786	73.8238	78.1646	78.7414	78.0106	78.2159	78.1725	78.4167	78.2697	78.9445	78.7553	78.8203	78.2687
89	P. toyotomiensis	70.7387	71.0043	71.2569	68.9958	72.8666	74.9824	72.1718	74.9139	74.9401	74.1062	75.0058	74.7671	74.9029	74.9841	74.9655	73.6449	75.0165	74.9822	76.334	73.3784	73.4351	74.1714	73.6811	73.8163	75.3132	75.1862	74.9603	74.2176	74.7815	75.0012	76.6552	76.7713	76.6841	73.0174	73.0871	73.5711	73.5527	78.2509	78.8236	78.1811	78.2698	78.2315	78.5951	78.4249	78.9601	78.998	78.9333	78.3167
90	P. chengduensis	70.9363	70.9343	71.3519	69.1767	72.9741	75.2026	72.2433	74.8479	75.0217	74.3348	75.1985	74.8435	75.0761	74.8954	75.1248	73.7905	75.1137	75.2483	75.2633	73.4762	73.6252	74.2733	74.037	73.9518	75.6341	75.462	75.2324	74.5727	74.8778	75.1344	76.6355	76.9042	76.9788	73.1031	73.1143	73.6298	73.7805	78.4227	79.0595	78.2293	78.3774	78.305	78.5456	78.5004	79.0712	79.0402	79.0193	78.3931
91	P. sihuiensis	71.2584	71.4196	71.241	69.8641	73.1611	75.5532	72.4232	75.1323	75.2792	74.5225	75.279	74.9442	75.0582	75.1073	75.3097	73.9008	75.1318	75.27	75.4701	73.5936	73.6982	74.5658	74.0393	73.9679	75.6115	75.4476	75.2096	74.5831	74.9356	75.2514	76.8598	77.0912	77.0692	73.2657	73.2967	73.7578	73.9356	78.4979	79.2634	78.3886	78.5635	78.4525	78.702	78.6924	79.2436	79.1551	79.2097	78.499
92	P. indoloxydans	70.8504	71.1065	71.3512	69.0893	72.9026	75.3032	72.5466	74.8876	75.218	74.3471	75.4644	75.3337	75.4092	75.5194	75.6775	73.7775	75.6294	75.3375	75.8796	73.7419	74.0124	74.462	75.0091	74.1624	76.5859	75.6705	75.2736	74.8516	75.0966	75.327	76.862	77.196	77.8296	73.1961	73.2499	74.132	74.1077	78.6157	79.2353	78.5662	78.6331	78.5703	78.6588	79.0002	79.2275	79.2572	79.1295	78.7157
93	P. pseudoalcaligenes	70.9463	71.1478	71.348	69.1339	72.9206	75.319	72.5144	74.9599	75.32	74.4179	75.2118	75.0652	75.1589	75.3372	75.3928	73.8865	75.1887	75.0047	75.3278	73.4443	73.8475	74.3028	74.5873	74.0729	76.0263	75.2468	75.3553	74.6707	75.0925	75.2087	77.1059	77.354	78.085	73.3093	73.2535	73.9732	73.9921	78.7227	79.2504	78.6992	78.7476	78.7555	78.8385	79.1114	79.4731	79.4207	79.3892	78.8718
94	P. oleovorans	71.1258	71.1078	71.2796	69.2655	72.9627	75.2747	72.3318	74.9256	75.2732	74.5275	75.4812	75.1927	75.3383	75.3891	75.5107	73.9246	75.3462	75.2753	75.4166	73.7756	73.7686	74.5475	73.9204	73.9374	75.6252	75.3657	75.2558	74.5338	75.0754	75.2211	77.0525	77.4219	77.3189	73.2069	73.2103	73.8988	73.8999	78.6611	79.2583	78.5736	78.7092	78.6549	78.8084	78.8296	79.4493	79.4111	79.3472	78.754
95	Azotobacter chroococcum	70.6511	70.7284	70.7748	68.9378	73.0542	76.3644	72.206	75.1471	74.9203	74.3681	74.8389	74.591	75.0387	74.9945	74.9786	73.7435	75.4188	75.1016	75.0566	73.4195	73.5481	74.3698	73.8472	73.9296	75.8911	75.6793	75.4038	74.4384	75.0882	75.4081	77.2097	77.72	77.6021	72.7837	72.7201	73.3787	73.4339	79.4235	79.9995	78.7659	78.8126	78.7523	79.2688	79.0749	80.1807	79.9856	80.0416	79.7023
96	Azotobacter beijerinckii	70.4684	70.5629	70.8079	68.675	73.182	76.4947	72.15	75.1229	74.845	74.3792	74.9586	74.6704	75.0128	74.9608	74.9305	73.795	75.4829	75.1391	75.1704	73.5381	73.7715	74.5458	73.9748	73.8186	76.1429	75.7661	75.606	74.5115	75.194	75.4308	77.5137	77.8003	77.6493	73.0665	72.7738	73.5708	73.5921	79.4485	79.9963	78.4901	78.6905	78.6779	79.2348	79.0007	80.0888	79.906	79.9841	79.6435
97	Azotobacter salinestris	71.7181	71.565	70.7262	70.751	73.3383	76.7055	72.6168	75.2761	75.176	74.6567	75.2623	74.9598	75.4301	75.1618	75.1982	74.145	75.5222	75.2346	75.3022	73.7783	73.9191	74.6694	74.277	74.1572	76.0582	75.848	75.7589	74.7928	75.2454	75.6388	77.5252	77.9494	77.7266	73.2033	73.1583	73.6508	73.8983	79.515	79.8969	78.8063	78.894	78.6616	79.2252	79.1747	80.1798	79.9054	80.086	79.7045
98	P. dryadis	70.9418	70.6987	71.0857	68.7041	72.8925	75.36	72.307	75.0287	74.9318	74.4353	74.938	74.6498	74.9619	74.9039	74.8818	73.9155	75.1622	75.1496	75.2248	73.6883	73.8116	74.4204	73.9204	74.0583	75.8679	75.5307	75.4845	74.5232	75.1671	75.4587	77.1086	77.3663	77.3224	73.052	73.0275	73.5762	73.5972	79.0951	79.5992	78.5236	78.6176	78.5885	79.1749	78.9769	79.632	79.5586	79.5821	79.5509
99	P. daroniae	70.7342	70.8728	71.1486	68.9037	72.764	74.8479	72.1195	74.4325	74.6868	74.0177	74.4826	74.164	74.5307	74.4077	74.4594	73.6403	74.6053	74.7383	74.7185	73.3572	73.2315	74.1151	73.6897	73.7346	74.9624	74.91	74.8223	74.1432	74.5824	74.7441	76.404	76.5904	76.6015	72.9258	72.8593	73.4726	73.4833	77.8581	78.3429	77.565	77.8709	77.7855	78.0615	77.9704	78.2911	78.2817	78.2143	78.252
100	P. flavescens	70.7086	70.7287	70.87	68.6321	72.6727	75.0885	71.9891	74.5779	74.69	73.9495	74.4782	74.2438	74.4972	74.5007	74.4716	73.4351	74.4579	74.4353	74.5351	73.4234	73.3212	74.0421	73.4617	73.6029	75.2236	75.0148	74.8755	74.1261	74.4982	74.859	76.39	76.6225	76.6603	72.8039	72.7813	73.3741	73.4416	77.9452	78.3693	77.5967	77.8816	77.8231	78.2744	78.1818	78.505	78.4595	78.455	78.2225
101	P. seleniipraecipitans	70.6613	71.02	71.3333	69.1727	72.8718	74.6468	72.3383	74.3171	74.5765	73.9514	74.2922	74.264	74.3733	74.4209	74.341	73.5147	74.4175	74.3326	74.3492	73.198	73.3598	73.9491	73.3659	73.5383	74.7092	74.655	74.5092	73.8965	74.4116	74.4433	76.036	76.0901	76.0795	72.9701	72.8787	73.3957	73.4274	77.4888	77.8521	77.2192	77.3762	77.3193	77.5361	77.551	77.9116	77.8644	77.8345	77.6208
102	P. punonensis	70.7153	70.974	71.2418	68.8958	72.8233	74.686	71.8754	74.3971	74.6933	73.9924	74.57	74.411	74.5947	74.4878	74.5656	73.4572	74.6122	74.4881	74.4623	73.3401	73.4161	73.8788	73.5736	73.6534	74.9827	74.7308	74.6943	74.2147	74.55	74.7297	76.3094	76.3321	76.3899	72.9443	72.956	73.4896	73.5373	77.5688	78.0626	77.4598	77.6537	77.6453	77.8461	77.8539	78.1709	78.1279	78.1129	77.802
103	P. argentinensis	71.1511	70.8513	71.0351	69.1731	72.8763	75.0709	72.4471	74.8259	74.8504	74.1816	74.7473	74.4347	74.7094	74.7058	74.6765	73.7834	74.8431	74.8382	75.152	73.403	73.5919	74.1782	73.5948	73.7798	75.4809	75.3551	75.1138	74.2348	74.7814	75.0625	76.8003	77.0167	76.9578	73.3116	72.8196	73.3958	73.4406	78.1621	78.9718	78.1127	78.2625	78.2534	78.4445	78.3953	79.0129	78.8742	78.9612	78.6133
104	P. straminea	70.7108	70.8537	71.1294	68.8843	72.7824	74.9422	72.305	74.8987	75.1454	74.3675	74.6856	74.4151	74.9163	74.8552	74.795	73.7197	74.8824	74.7663	74.7034	73.6021	73.4918	74.1198	73.689	73.8876	75.3845	75.2368	75.0303	74.2941	74.8025	75.0919	76.7881	77.0827	77.0093	72.9575	73.0159	73.5734	73.5987	78.2696	78.9682	78.181	78.3101	78.2789	78.4594	78.5092	79.0056	78.9715	79.0183	78.4835
105	P. cuatrocienegasensis	70.8581	71.2028	71.3967	69.3525	72.8004	74.8631	72.2923	74.6059	74.9466	74.116	74.6073	74.2219	74.4423	74.4407	74.6334	73.8532	74.5903	74.6668	74.9526	73.5191	73.5702	73.9676	73.6114	73.6674	75.1172	74.7516	74.5753	74.1126	74.4544	74.7163	76.2373	76.2574	76.1903	72.8959	72.8968	73.2192	73.3437	77.7952	78.4679	77.7655	77.7946	77.7226	78.1249	77.9347	78.432	78.3875	78.3962	78.0609
106	P. leptonychotis	70.8521	71.4534	71.8317	69.556	72.7908	74.1222	72.054	73.9897	74.425	73.613	73.8566	73.8307	73.7674	73.7507	73.8013	73.2157	73.9926	73.914	73.8945	72.9615	73.2253	73.2018	73.1603	73.252	74.0922	73.7871	73.9093	73.5383	73.7117	73.9688	75.0067	75.1478	75.0361	72.7158	72.6821	73.0432	73.1127	76.183	76.6005	76.2305	76.3838	76.2897	76.4224	76.3775	76.4851	76.5656	76.596	76.2951
107	P. guineae	70.5069	71.4037	71.8086	69.3963	72.6861	74.0474	71.9051	73.5991	74.4477	73.4321	73.676	73.7137	73.8891	73.6426	73.7175	73.1496	73.9453	73.8124	73.7996	72.8131	73.0328	73.2703	73.0189	72.9957	73.9724	73.774	73.8035	73.4283	73.7651	73.8806	74.9314	75.0733	74.9636	72.7383	72.7052	73.1167	73.1473	76.113	76.5152	76.2434	76.349	76.2657	76.3921	76.244	76.5376	76.5831	76.5608	76.2067
108	P. peli	70.7349	71.3409	71.7631	69.4818	72.968	74.6222	72.3244	74.3713	74.886	73.82	74.2874	74.282	74.4054	74.3402	74.3436	73.5125	74.4039	74.2361	74.2389	73.2232	73.3407	73.6367	73.4225	73.4267	74.7853	74.5837	74.4656	73.9877	74.295	74.513	75.7474	75.808	75.6797	73.0745	73.0686	73.4546	73.4866	77.0732	77.6364	77.2436	77.301	77.2635	77.3297	77.2284	77.6101	77.6422	77.6458	77.2289
109	P. anguilliseptica	71.3318	71.5994	71.7147	70.0357	73.0737	74.9173	72.5004	74.5491	74.9546	74.2387	74.7007	74.5197	75.8605	74.5565	74.6565	73.889	74.6096	74.6993	74.7798	73.5945	74.863	74.0322	73.8399	73.9157	75.0929	74.8536	74.9476	74.5622	74.7879	74.9784	75.9978	76.2415	76.0638	73.4412	73.5141	73.6271	73.7531	77.353	77.8078	77.3356	77.4884	77.3514	77.3876	77.4712	77.8813	77.7981	78.1429	77.4875
110	P. segetis	70.4833	71.4408	71.7548	69.6107	72.7283	73.7625	71.9213	73.5873	73.9219	73.2199	73.4998	73.3618	73.6153	73.5479	73.4932	73.0479	73.5281	73.5907	73.545	72.911	72.8496	73.0401	72.8421	72.9871	73.7343	73.4567	73.3206	73.2753	73.5414	73.5257	74.4465	74.4918	74.4335	72.6353	72.6773	72.9537	72.9673	75.2938	75.4863	75.2341	75.2355	75.2021	75.3749	75.2858	75.323	75.3457	75.3966	75.3896
111	P. marincola	70.7308	71.4484	71.8652	69.541	72.587	73.698	71.8061	73.8832	74.2716	73.2919	73.8467	73.7438	73.9429	73.7605	73.7872	73.2035	74.0587	73.5697	73.6336	73.0167	73.2153	73.2689	72.843	72.899	73.7109	73.4413	73.6837	73.4041	73.5099	73.5704	74.3832	74.5808	74.5115	72.7082	72.8309	73.1565	73.2488	75.5033	75.6434	75.479	75.5358	75.4767	75.6367	75.5973	75.7461	75.5701	75.7963	75.6168
112	P. taeanensis	70.5577	71.2246	71.3625	69.0979	72.8392	74.9542	71.8951	74.3381	74.5798	73.9409	74.2273	73.9629	74.1923	74.2158	74.2261	73.4428	74.6319	74.5834	74.753	73.249	74.053	73.6105	73.456	73.5171	74.7881	74.5261	74.5358	73.8108	74.1654	74.5918	75.83	75.8951	75.9089	72.9168	72.8176	73.3813	73.3648	77.6967	78.0147	77.3979	77.4814	77.4687	77.8521	77.4923	78.1031	78.0186	78.0599	77.6649
113	P. borbori	70.8462	70.9236	71.1852	68.9917	72.8913	75.4101	72.3341	75.1094	75.0716	74.3797	74.8686	74.5365	74.8585	74.7615	74.8999	73.8409	75.0965	75.1056	75.4851	73.7717	73.8962	74.3445	74.0479	74.1518	75.6552	75.2451	75.2866	74.4668	74.9313	75.3505	76.9301	77.2013	77.2035	73.1926	73.0692	73.5667	73.6597	78.9885	79.5168	78.4462	78.6396	78.607	79.0757	78.7781	79.6169	79.5385	79.4937	79.2067
114	P. benzenivorans	70.5452	70.6804	70.9697	68.6521	72.8387	75.7356	72.423	75.0381	75.264	74.4333	74.9296	74.7044	75.0857	75.1301	75.0119	73.9102	75.6656	75.2251	75.2758	73.7376	74.0158	74.3979	74.0564	73.9575	76.0166	75.5627	75.5571	74.4593	75.0467	75.5302	77.2769	77.5464	77.6225	73.2298	73.1043	73.8278	73.8464	79.9083	80.3594	79.0226	79.243	79.2201	79.8098	79.4212	80.4749	80.3835	80.4266	80.0422
115	P. typographi	70.635	70.6892	70.8338	69.0477	72.1603	73.5681	71.7258	73.6814	73.9618	72.991	73.3617	73.1656	73.4749	73.4706	73.4453	72.8144	73.6385	73.5595	73.5479	72.6387	72.6618	73.0613	72.6039	72.7222	73.9141	73.649	73.5899	73.0646	73.2918	73.6875	74.7878	74.8335	74.804	72.1232	72.1362	72.4978	72.6008	75.8413	76.2535	75.6292	75.7325	75.6665	75.9183	75.96	76.3684	76.2634	76.2943	76.0875
116	P. massiliensis	71.3719	71.4731	70.6964	70.1262	72.7859	74.0567	72.0188	74.3213	73.9917	73.6222	74.0073	73.7988	73.9635	73.9387	74.037	73.4257	74.2699	73.9549	73.8961	73.0859	73.2382	73.577	73.1923	73.3834	74.4091	74.6037	74.6237	73.7154	74.273	74.5955	75.5889	75.7564	75.5654	72.6162	72.7119	72.9676	73.5585	76.3403	76.7622	76.1497	76.2335	76.0813	76.3383	76.3693	76.8741	76.8015	77.0448	76.9161
117	P. baltica	71.0921	70.5968	70.7342	68.8249	72.3353	74.3614	71.8049	74.1893	74.3015	73.7281	74.1388	73.9981	74.1534	74.2161	74.1669	73.3553	74.3172	74.163	74.1621	73.1461	73.0926	73.7455	73.0682	73.3319	74.5187	74.6074	74.396	73.6884	74.1982	74.4458	75.9202	76.1315	76.099	72.6673	72.5745	73.1585	73.1761	77.4255	77.8051	77.3308	77.318	77.2392	77.4181	77.4738	77.9939	78.0064	77.988	77.534
118	P. coleopterorum	71.8047	71.4608	70.9957	70.4608	72.8368	74.6453	72.1644	74.5681	74.8316	74.3261	74.6637	74.5159	74.7686	74.6685	74.6659	73.8903	74.628	74.6538	74.6345	73.6069	73.7453	74.2012	73.6989	73.877	75.005	75.073	74.9842	74.1277	74.633	74.892	76.1938	76.423	76.2463	73.1167	72.9541	73.2986	73.449	77.6234	77.9093	77.3949	77.4685	77.3503	77.6223	77.7891	78.0412	77.9769	78.0897	77.7138
119	P. rhizosphaerae	72.1527	71.4907	70.8684	70.9252	72.9151	74.7089	72.189	74.6196	74.8121	74.3684	74.6632	74.5353	74.8521	74.7949	74.8095	74.1202	74.7667	74.7584	74.7131	73.7826	73.7413	74.1962	73.844	73.9249	74.9233	74.9925	74.8057	74.2775	74.7325	74.9637	76.1785	76.2938	76.1509	73.0424	73.0452	73.2636	73.533	77.5793	77.8141	77.5022	77.5094	77.3679	77.6623	77.6581	78.1134	77.9671	78.0429	77.7828
120	P. akappagea	70.855	70.6769	71.2404	68.933	72.5121	74.5041	71.8078	74.1215	74.1541	73.6534	74.0618	73.9741	74.254	74.1374	74.1181	73.2491	74.0022	74.035	74.0922	73.1744	73.1666	73.5587	73.2299	73.3153	74.4799	74.3586	74.194	73.6517	74.0263	74.3602	75.6595	75.9333	75.8625	72.9	72.786	73.3231	73.3679	77.0622	77.3764	76.8919	76.9896	76.9312	77.3358	77.1775	77.4538	77.5027	77.4412	76.9712
121	P. defluvii	70.8786	71.0165	71.649	69.162	72.8594	74.3819	71.9779	74.3761	74.2549	73.8636	74.0597	74.0863	74.2586	74.4527	74.2615	73.4215	74.6877	74.2127	74.3297	73.0972	73.3524	73.7796	75.048	73.3356	75.4518	74.1951	74.1327	73.7631	74.277	74.188	75.0738	75.2582	76.2959	73.0106	72.9291	73.5708	73.6443	76.7538	77.1935	76.9451	76.9797	76.9141	77.0456	77.4008	77.4289	77.2472	77.2431	76.7526
122	P. laurentiana	70.9046	70.8978	71.2702	69.1161	72.5376	74.2452	71.7357	74.0202	73.8988	73.4849	73.8758	73.8208	73.9722	73.8916	73.9129	73.2795	73.8834	73.8093	73.9603	72.8876	72.9281	73.3773	72.9969	72.9795	74.0618	73.9132	73.9521	73.516	73.8141	73.88	75.0465	75.1752	75.093	72.8572	72.702	73.2344	73.29	76.6578	76.9327	76.7561	76.7238	76.6896	76.7478	76.6499	77.0966	77.0347	77.052	76.5253
123	P. qingdaonensis	70.6121	70.698	71.015	69.0731	72.6377	74.8429	71.8926	74.8775	74.8525	74.1451	74.6927	74.4252	74.6526	74.4859	74.679	73.6187	74.7344	74.5504	74.5405	73.509	73.3669	74.2025	73.51	73.6623	75.263	75.0481	74.8566	74.3358	74.6529	75.0241	76.2578	76.7703	76.6855	72.8647	72.824	73.4539	73.5294	78.281	78.6831	77.9863	78.0893	78.089	78.3307	78.2847	78.9479	78.9051	78.7878	78.308
124	P. brassicae	70.7058	70.8598	71.1788	69.0157	72.6409	74.6317	71.94	74.7755	74.8122	74.1312	74.3707	74.2626	74.6918	74.5125	74.4621	73.3853	74.4582	74.5212	74.4125	73.4954	73.3953	73.9529	73.4923	73.645	75.1074	74.7981	74.6552	74.0263	74.5017	74.9097	76.1993	76.534	76.5314	72.964	72.8373	73.4664	73.4895	77.9476	78.3677	77.703	77.9038	77.8334	78.0462	78.1692	78.603	78.5678	78.5081	77.8906
125	P. japonica	70.5095	70.4916	70.9298	68.6928	72.5097	74.7575	71.9363	74.8317	74.4981	74.0732	74.6046	74.3216	74.6665	74.5967	74.6023	73.5628	74.8709	74.6363	74.7136	73.4515	73.4118	74.2145	73.5486	73.6518	75.4637	75.1569	74.9513	74.33	74.8277	75.1171	76.5544	76.9054	76.8647	72.7827	72.5906	73.304	73.3524	78.6361	79.028	78.0994	78.3523	78.3224	78.7227	78.6145	79.3038	79.2077	79.1731	78.3765
126	P. huaxiensis	70.6523	70.7866	71.214	69.1042	72.5917	74.3858	71.9434	74.3468	74.373	73.6978	74.2671	74.1189	74.4056	74.2297	74.3163	73.4383	74.2425	74.2698	74.2905	73.1119	72.9681	73.8645	73.2103	73.358	74.7008	74.583	74.4461	73.8314	74.2219	74.5997	75.7946	76.1181	76.0573	72.8154	72.542	73.0976	73.0747	77.7244	78.2097	77.4786	77.7564	77.6951	77.9202	77.658	78.2416	78.2862	78.207	77.605
127	P. vranovensis	70.8657	70.6342	71.2467	69.1721	72.4723	74.5104	71.9049	74.2656	74.2454	73.5389	74.003	73.8937	74.2047	74.0876	74.0284	73.2054	74.0703	74.0899	74.0356	73.0162	73.0914	73.5925	73.1052	73.0691	74.5873	74.4155	74.317	73.7791	74.187	74.3724	75.7573	75.9609	75.933	72.8281	72.7735	73.2783	73.3065	77.2268	77.5318	77.1521	77.2837	77.2216	77.3391	77.3402	77.8286	77.831	77.8221	77.246
128	P. alkylphenolica	71.7794	71.7679	71.4005	70.6412	73.0861	74.8027	72.3005	74.8767	74.8972	74.332	74.6627	74.5039	75.1939	74.6987	74.6752	74.0423	75.192	74.5573	74.9276	73.5866	73.7217	74.3996	73.9281	74.121	74.9119	74.7326	74.8051	74.5851	74.6131	75.0648	76.0051	76.3627	76.2525	73.1589	73.1071	73.4708	73.651	77.5357	77.7115	77.3907	77.4912	77.3632	77.5791	77.5855	77.8897	77.7465	77.8047	77.468
129	P. hutmensis	70.7082	70.9357	71.2253	69.3781	72.7656	74.3611	71.7768	74.3446	74.213	73.587	73.9321	73.8799	74.1696	74.0775	74.1254	73.1945	74.0593	73.9978	74.0628	73.1279	73.0992	73.6159	73.1049	73.1105	74.3921	74.232	74.0978	73.5683	73.9883	74.2592	75.5609	75.8322	75.7464	72.8695	72.881	73.3737	73.4002	76.9021	77.2198	76.8372	76.9914	76.9766	77.163	77.1067	77.441	77.4298	77.4792	76.8629
130	P. tructae	71.8199	71.9589	71.2177	70.6322	73.1636	74.82	72.5911	74.827	74.8135	74.5352	74.8572	74.6629	74.942	74.8893	74.8035	74.0519	74.8007	75.0081	74.8953	73.8224	73.984	74.4926	73.9907	74.0024	75.258	75.0616	74.9837	74.4502	74.8657	75.206	76.1531	76.4107	76.2093	73.0368	73.1666	73.3959	73.6107	77.6693	78.0043	77.5845	77.6494	77.4894	77.9184	77.8787	78.3572	78.1747	78.2751	77.6308
131	P. donghuensis	70.6534	70.6392	71.2344	68.9984	72.6957	74.5703	71.9488	74.4883	74.568	73.996	74.4078	74.2375	74.5904	74.3686	74.355	73.4095	74.536	74.5093	74.4288	73.2826	73.3261	73.9192	73.3685	73.4035	75.0193	74.8261	74.6749	73.9949	74.5033	74.839	75.9067	76.3559	76.3403	72.8914	72.7353	73.3641	73.359	77.8681	78.3715	77.714	77.8172	77.8087	78.1081	78.0141	78.536	78.498	78.4614	77.6899
132	P. wadenswillerensis	71.4026	71.4227	71.3134	69.6863	72.8045	74.7916	72.2906	74.9479	74.7396	74.3019	74.6682	74.5196	74.7382	74.7027	74.6601	73.9058	74.7877	74.5738	74.5538	73.6454	73.6052	74.2869	73.6909	73.5774	75.1728	74.9356	74.9414	74.2811	74.7582	75.0601	76.2511	76.5788	76.459	72.9758	73.0068	73.5159	73.6284	77.9896	78.4041	77.807	77.9667	77.9183	78.2118	78.2154	78.6335	78.66	78.6292	77.9052
133	P. cremoricolorata	70.3906	70.6367	70.9642	68.538	72.6173	74.4483	71.9287	74.4732	74.639	73.9617	74.434	74.1348	74.5797	74.4152	74.3551	73.4741	74.6009	74.3771	74.3623	73.2515	73.3346	73.8263	73.2653	73.322	75.0825	74.8553	74.5184	73.9336	74.3686	74.7547	76.2319	76.4675	76.3868	72.7753	72.6868	73.2611	73.2681	77.6866	78.2023	77.451	77.6156	77.5847	77.9332	77.9338	78.3246	78.3025	78.3729	77.6357
134	P. urmiensis SWRI10	71.6947	71.7721	71.6379	70.2314	73.1173	74.6293	72.3429	74.8585	74.9328	74.2557	74.7505	74.5649	74.8664	74.7561	74.7603	73.8487	74.9629	74.7139	74.6855	73.6715	73.6648	74.2533	73.5349	73.7373	75.1116	75.0365	74.8338	74.3667	74.6899	75.0517	76.0453	76.2791	76.2619	73.2277	72.9507	73.5281	73.5273	77.5723	77.9673	77.4564	77.6699	77.5967	77.7235	77.8216	78.0941	78.0844	78.1418	77.3955
135	P. reidholzensis	70.9745	70.83	70.9929	69.1549	72.4524	74.5702	72.0832	74.7721	74.8605	74.1465	74.5289	74.3229	74.7017	74.5936	74.5821	73.6476	74.6626	74.5764	74.5575	73.5766	73.3493	74.2062	73.3694	73.4658	75.1637	74.9155	74.9192	74.1994	74.6549	75.0644	76.3866	76.6609	76.6412	72.8182	72.696	73.3627	73.3702	78.1331	78.5366	77.9396	78.0606	77.9794	78.2925	78.2177	78.6955	78.7113	78.7043	77.9802
136	P. shirazensis SWRI56	70.7775	70.9026	71.2089	69.1911	72.5523	74.1348	71.8604	74.4405	74.3859	73.74	74.0315	73.9416	74.3384	74.2727	74.2233	73.2449	74.2687	74.1236	74.0833	73.1359	73.1627	73.6526	73.1295	73.3148	74.6074	74.4144	74.2542	73.6891	74.0613	74.3983	75.7043	75.9111	75.846	72.6775	72.6426	73.2397	73.2687	77.1853	77.642	77.1496	77.2295	77.1348	77.3357	77.4226	77.639	77.6345	77.5292	76.9597
137	P. shirazensis O2C-26	72.0561	71.9118	71.0656	70.6676	72.851	74.5902	72.3493	74.7195	74.8923	74.2667	74.8358	74.6057	74.9356	74.8323	74.8145	74.05	74.6835	74.6658	74.5417	73.6696	73.7115	74.3148	73.7383	73.8226	74.8921	74.8171	74.9222	74.3355	74.7067	74.9659	75.9514	76.107	75.8734	72.9608	72.9398	73.2319	73.4387	77.5004	77.798	77.3555	77.446	77.2316	77.5524	77.6814	77.9293	77.7207	77.8	77.284
138	P. guariconensis	70.8597	70.758	70.9148	69.1688	72.6945	74.4698	71.8817	74.6701	74.473	74.0159	74.4664	74.3695	74.5551	74.5775	74.5902	73.5999	74.55	74.4231	74.4646	73.2187	73.2726	73.9332	73.39	73.3132	75.0249	74.9242	74.8621	74.036	74.5162	74.7271	76.3076	76.3335	76.2747	72.8472	72.8208	73.302	73.3871	77.7781	77.9622	77.5438	77.5815	77.5347	77.7801	77.7665	78.3622	78.3135	78.2993	77.5586
139	P. wayambapalatensis RW3S1	70.5649	70.7135	70.9753	68.9219	72.5013	74.6266	71.9693	74.6896	74.6627	74.0677	74.6389	74.3741	74.6622	74.4561	74.4696	73.5275	74.5284	74.5146	74.4815	73.3716	73.2979	74.0569	73.3621	73.459	75.1354	74.8835	74.8911	73.9945	74.5974	74.8608	76.3195	76.5323	76.5456	72.8882	72.8679	73.4034	73.4263	77.9488	78.4015	77.9065	77.9407	77.9205	78.1285	78.144	78.5379	78.5952	78.6084	77.6748
140	P. wayambapalatensis RW3S2	71.0321	70.9168	71.0976	69.1604	72.8384	74.5951	72.097	74.8414	74.6832	74.0074	74.5964	74.3649	74.6621	74.607	74.5467	73.5301	74.7521	74.4769	74.521	73.5413	73.3013	74.1646	73.4534	73.5264	75.1073	74.9985	74.9538	74.0875	74.684	74.9337	76.3918	76.6216	76.6013	72.952	72.8242	73.4143	73.4238	77.9111	78.3745	77.8855	77.9394	77.8541	78.0998	78.0991	78.6472	78.6052	78.6125	77.7222
141	P. wayambapalatensis RW10S2	70.8783	70.7777	70.8714	69.0822	72.6731	74.7012	71.9392	74.5798	74.6278	73.9616	74.483	74.3228	74.5349	74.5325	74.428	73.4444	74.5051	74.3948	74.3751	73.2935	73.1998	73.9372	73.3469	73.4906	75.0584	74.7851	74.7828	74.073	74.5392	74.7878	76.3359	76.6321	76.6084	72.9186	72.8785	73.4082	73.4066	77.9995	78.4462	78.0039	78.0405	77.9803	78.0928	78.1586	78.7635	78.706	78.7116	77.8087
142	P. farsensis SWRI107	71.3076	71.2237	71.3182	69.7317	72.9062	74.5489	72.1855	74.6519	74.6856	74.1114	74.3883	74.3623	74.6146	74.4637	74.4696	73.5247	74.5713	74.6057	74.5762	73.4717	73.5035	74.0153	73.5329	73.6649	74.9801	74.7481	74.6672	74.0397	74.5764	74.8788	75.997	76.2397	76.2211	73.0564	72.9591	73.4603	73.483	77.4057	78.0363	77.5593	77.5647	77.5189	77.7054	77.809	78.0743	78.0925	78.0682	77.4601
143	P. farsensis SWRI51	71.268	71.2503	71.3037	69.874	72.809	74.4425	72.2973	74.6494	74.83	74.1119	74.3637	74.243	74.6148	74.493	74.4478	73.5482	74.6329	74.5479	74.5562	73.3995	73.4428	73.9824	73.4675	73.5594	74.9412	74.8519	74.6684	74.6972	74.5424	74.7739	75.9833	76.2714	76.2773	73.0264	72.9057	73.4459	73.5092	77.5551	78.4763	77.6956	77.7908	77.7593	77.8723	77.8936	78.2635	78.2273	78.2415	77.5452
144	P. xanthosomae COR54	71.0031	70.8946	70.9994	69.21	72.8418	74.7071	72.1457	74.9053	75.0271	74.2287	74.6296	74.4306	74.8049	74.7163	74.7704	73.599	74.7222	74.7089	74.6963	73.4112	73.3016	74.2391	73.3966	73.5607	75.2698	75.2901	75.0984	74.2367	74.6788	75.1789	76.4127	76.7976	76.7024	72.9776	72.857	73.447	73.556	78.2838	78.79	78.1383	78.2891	78.2432	78.6423	78.5991	79.2069	79.1474	79.0388	78.2483
145	P. fakonensis COW40	71.0855	71.3432	71.1391	69.0906	72.8982	74.5407	72.2071	75.0276	74.8481	74.2471	74.6519	74.4535	74.822	74.6868	74.6946	73.6874	74.7671	74.5838	74.5188	73.3891	73.3833	74.2132	73.5512	73.6725	75.2497	75.1317	74.9505	74.3384	74.7464	75.0947	76.4239	76.9319	76.8577	72.9208	72.8158	73.4328	73.3868	78.215	78.6704	78.1179	78.3416	78.2545	78.4225	78.5113	79.1305	79.1176	79.0746	78.2875
146	P. sichuanensis	70.9925	70.8979	71.0886	69.1827	72.6606	74.6341	72.0975	74.8497	74.7639	74.175	74.4626	74.4039	74.706	74.6359	74.5712	73.5397	74.6765	74.5074	74.4834	73.385	73.4921	74.2029	73.7425	73.6405	75.1684	75.1559	75.0051	74.3536	74.679	75.1035	76.5905	76.8709	76.8834	72.9132	72.7863	73.4926	73.4869	78.2634	78.7198	78.2139	78.3146	78.2656	78.3599	78.5228	79.0954	78.9749	79.046	78.1885
147	P. entomophila	71.8437	71.5201	70.8506	70.6759	73.174	74.9225	72.5722	75.1647	75.0917	74.4564	74.8861	74.6589	75.0314	74.7612	74.842	73.9057	74.9913	74.8498	74.8057	73.5751	73.6531	74.3988	73.8339	73.822	75.4384	75.3056	75.3112	74.4677	74.9703	75.3765	76.7892	77.2286	77.0179	73.139	73.1206	73.546	73.7667	78.4056	78.8928	78.3849	78.4178	78.2806	78.6281	78.7231	79.2676	79.1246	79.2604	78.3372
148	P. muyukensis COW39	70.8335	70.5376	70.8342	68.6469	72.6401	74.7169	71.9769	74.8389	74.9459	74.2529	74.6808	74.515	74.85	74.7607	74.8709	73.5396	74.986	74.8563	74.7536	73.507	73.4278	74.2752	73.5758	73.705	75.522	75.3477	75.1581	74.2571	74.9175	75.204	76.8047	77.0126	77.0299	72.9502	72.7286	73.3279	73.3572	78.4854	79.0353	78.403	78.493	78.4425	78.6897	78.7356	79.4688	79.4245	79.408	78.6039
149	P. xantholysinigenes RW9S1A	70.9593	71.0028	71.0796	69.0966	73.0412	74.8426	72.1308	75.1067	74.9268	74.3189	74.7149	74.5354	74.9898	74.702	74.8151	73.7198	74.9945	74.7716	74.7432	73.5848	73.5873	74.4134	73.7277	73.765	75.6264	75.3466	75.2559	74.443	74.9059	75.3446	76.8948	77.1368	77.0541	72.9762	72.8569	73.5091	73.5876	78.3954	78.9209	78.3423	78.3888	78.382	78.593	78.655	79.2885	79.1943	79.2496	78.5523
150	P. soli	70.6163	70.5884	70.8831	68.6744	72.6018	74.6007	71.9393	74.7985	74.6872	73.9863	74.492	74.2552	74.6104	74.4824	74.3888	73.4256	74.5224	74.5071	74.4379	73.2655	73.1652	73.9568	73.1962	73.4428	75.1011	75.1191	74.9117	73.9552	74.5511	74.8972	76.4785	76.8426	76.7581	72.8141	72.6605	73.3589	73.4334	78.1319	78.6211	77.9327	78.0744	78.0487	78.2483	78.3526	78.8827	78.8445	78.9106	78.0329
151	P. maumuensis COW77	70.5857	70.7563	70.8403	69.0583	72.7141	74.7218	71.9187	74.7161	74.695	74.0687	74.4717	74.2599	74.5816	74.4836	74.5107	73.424	74.6846	74.4948	74.4646	73.2764	73.3234	74.0842	73.3241	73.5067	75.1622	74.9194	74.9035	74.0905	74.7092	74.9471	76.4275	76.7849	76.7778	72.8294	72.6388	73.2994	73.3545	78.2165	78.5975	78.0131	78.128	78.0921	78.2319	78.3065	78.9641	78.9131	78.9153	78.0976
152	P. mosselii	70.4617	70.3958	71.0207	68.8185	72.5012	74.8273	72.0159	74.8069	74.7196	73.9914	74.5708	74.3381	74.613	74.7271	74.6669	73.3405	74.7227	74.4981	74.4051	73.2438	73.3265	74.0283	75.0793	73.5768	76.2396	75.2386	75.0093	74.2531	74.8031	75.0717	76.4543	76.7605	77.8572	73.1459	72.7361	73.3169	73.4703	78.3654	78.797	78.2252	78.2834	78.2664	78.4802	78.7774	79.2103	79.1403	78.9627	78.2514
153	P. peradeniyensis BW13M1	70.5969	70.6944	70.8001	68.846	72.7433	74.8248	71.9744	74.845	74.9496	74.2575	74.684	74.5559	74.8566	74.6572	74.7386	73.439	74.8695	74.7231	74.7256	73.5452	73.3582	74.1998	73.689	73.6308	75.46	75.2997	75.1873	74.2467	74.8839	75.1954	76.8016	77.2294	77.2769	72.9195	72.7737	73.4552	73.5205	78.698	79.2401	78.4496	78.6141	78.5697	78.7548	78.8435	79.6747	79.5739	79.5792	78.6717
154	P. peradeniyensis BW16M2	70.9154	70.8739	70.9326	69.5323	72.8348	74.9227	72.0871	74.8791	74.896	74.2879	74.7643	74.5957	74.8779	74.7177	74.7534	73.4452	74.9849	74.8122	74.8526	73.441	73.4567	74.2653	73.6066	73.7637	75.59	75.2301	75.1147	74.2109	74.7959	75.1709	76.8709	77.236	77.2775	73.0152	72.8837	73.5489	73.5691	78.6302	79.3563	78.5483	78.6227	78.617	78.8864	78.8944	79.6491	79.5593	79.5311	78.6266
155	P. taiwanensis	70.3233	70.5646	70.9819	68.7143	72.5116	74.3745	71.6098	74.4511	74.3148	73.8073	74.2873	74.141	74.3077	74.2988	74.2289	73.1477	74.2208	74.2668	74.2756	73.0768	73.2509	73.6713	73.2372	73.1942	74.8232	74.6962	74.4746	73.7543	74.2019	74.6904	75.9258	76.1633	76.1104	72.7104	72.607	73.2073	73.2484	77.3669	77.9072	77.4516	77.4742	77.4313	77.6091	77.6899	78.2087	78.1845	78.1246	77.4027
156	P. plecoglossicida	70.6383	70.6635	70.8786	68.8711	72.6614	74.6855	71.9197	74.851	74.6995	73.9464	74.5691	74.4438	74.6825	74.6144	74.5528	73.5199	74.5946	74.5047	74.4311	73.3382	73.3221	73.9522	73.2776	73.4356	75.1265	74.9231	74.8162	73.9948	74.5623	74.8349	76.3861	76.6983	76.6267	72.8468	72.8267	73.3443	73.3711	78.1487	78.5217	77.9824	78.014	77.9903	78.1411	78.2278	78.7972	78.6981	78.8397	77.9694
157	P. vlassakiae RW4S2	71.0533	71.3478	71.3103	69.951	72.9355	74.739	72.2415	74.9051	74.6881	74.0479	74.6375	74.3798	74.7271	74.646	74.5652	73.6083	74.593	74.5837	74.5638	73.3509	73.4437	74.0456	73.4159	73.5296	75.2527	75.0532	74.9556	74.1817	74.6701	74.9931	76.4839	76.6391	76.5692	72.9768	72.988	73.4594	73.479	77.8675	78.4718	77.858	77.9546	77.9151	78.1809	78.2446	78.6344	78.5997	78.5607	77.8544
158	P. promysalinigenes RW10S1	70.5619	70.8699	71.104	68.9411	72.4554	74.0771	71.7095	74.2008	74.1362	73.5218	73.8365	73.7314	74.0767	74.025	73.9934	73.037	73.9115	73.9767	73.9772	72.9256	72.837	73.3543	72.9598	72.9379	74.4032	74.4056	74.062	73.5109	73.9979	74.2347	75.5172	75.6259	75.5515	72.6812	72.5425	73.0917	73.0989	76.7065	77.1668	76.7265	76.7381	76.668	76.9459	76.9686	77.3322	77.3363	77.3422	76.6733
159	P. capeferrum	71.5568	71.5174	70.954	70.7806	73.0323	74.7095	72.4042	74.8723	75.0245	74.3378	74.731	74.478	74.7626	74.7927	74.8114	73.9632	74.6587	74.6748	74.6789	73.6924	73.5873	74.1876	73.6277	73.6139	74.9959	75.0539	74.97	74.2481	74.768	75.1466	76.3658	76.4589	76.1845	72.9005	72.9527	73.2913	73.4476	77.5637	78.0219	77.6412	77.7526	77.5921	77.9475	78.0921	78.3844	78.2212	78.4213	77.6765
160	P. kermanshahensis SWRI100	70.7406	70.8427	71.1517	68.968	72.6445	74.3871	71.8701	74.4904	74.7578	73.8963	74.4565	74.2205	74.4026	74.3554	74.4237	73.3436	74.5231	74.3464	74.314	73.2007	73.0946	73.8761	73.3212	73.327	74.8987	74.7559	74.6362	74.0748	74.3003	74.7254	75.9479	76.1562	76.1148	72.7305	72.6508	73.2581	73.293	77.5499	77.8971	77.4683	77.5142	77.4638	77.7243	77.8364	78.1507	78.1233	78.1423	77.5283
161	P. kermanshahensis SWRI50	70.6744	70.9753	71.2401	69.2019	72.7349	74.3494	71.8513	74.5976	74.7294	73.9526	74.4192	74.2551	74.4687	74.469	74.4709	73.4493	74.5084	74.3948	74.3394	73.1088	73.2139	73.9461	73.341	73.2895	74.9293	74.8326	74.5981	73.9528	74.4532	74.7682	75.8664	76.1868	76.1209	72.6972	72.722	73.2809	73.3024	77.4614	78.1576	77.51	77.5615	77.5005	77.7926	77.8568	78.2609	78.1935	78.2147	77.4986
162	P. kermanshahensis SWRI67	70.8483	71.0327	71.1792	69.0597	72.7252	74.3277	71.8529	74.4852	74.7208	74.0663	74.6222	74.3536	74.5692	74.4831	74.5656	73.6043	74.5982	74.435	74.3701	73.2281	73.2651	74.0138	73.5098	73.4739	74.8553	74.7981	74.7598	74.1012	74.4117	74.8366	76.0066	76.1928	76.1364	72.8906	72.703	73.417	73.4533	77.5311	77.9878	77.5091	77.5941	77.5605	77.7624	77.8504	78.1435	78.1978	78.1501	77.5645
163	P. kermanshahensis E41	71.4813	71.6667	70.9987	70.6827	72.9906	74.7595	72.3492	74.826	75.0828	74.3633	74.671	74.576	74.7633	74.6758	74.7677	73.9781	74.7366	74.6811	74.6143	73.5179	73.6908	74.3425	73.7361	73.8283	74.9536	75.0189	74.9713	74.45	74.7072	75.1306	76.226	76.4524	76.2121	72.9722	73.0467	73.3417	73.5435	77.6127	78.0467	77.6793	77.7748	77.619	78.018	78.0221	78.3475	78.1953	78.3625	77.7634
164	P. kermanshahensis E46	71.5937	71.68	71.0373	70.8111	73.0085	74.6728	72.3693	74.9116	75.0661	74.3578	74.9517	74.7229	74.8484	74.6581	74.8194	73.985	74.8546	74.8254	74.7433	73.7108	73.5938	74.453	73.7373	73.7155	75.1051	75.0624	75.0677	74.492	74.8158	75.1635	76.2471	76.3867	76.1388	73.0241	73.0433	73.3503	73.5924	77.6135	78.1502	77.557	77.7575	77.6014	77.9713	78.102	78.3965	78.2219	78.3134	77.6832
165	P. parafulva	70.5551	70.6397	70.9741	68.8818	72.583	74.101	71.9462	74.4117	74.3164	73.7808	74.1602	73.9582	74.3383	74.3576	74.2935	73.2057	74.2576	74.2982	74.3169	73.0894	73.0873	73.5862	73.0147	73.2183	74.6938	74.6401	74.5328	73.7543	74.3282	74.5753	75.6886	75.942	75.9543	72.8219	72.6677	73.2378	73.2126	77.0837	77.5749	77.2044	77.2413	77.1873	77.2937	77.4486	77.8824	77.8245	77.8127	77.2149
166	P. fulva	70.8869	70.7058	70.9443	69.1633	72.531	74.0056	71.75	74.2485	74.2568	73.7597	74.0527	74.0453	74.1519	74.1339	74.168	73.2243	74.1142	74.157	74.1349	73.0998	73.0572	73.6325	73.0212	73.1853	74.4722	74.6236	74.3106	73.6255	74.0524	74.4426	75.5659	75.6811	75.6742	72.8018	72.7085	73.2386	73.2295	76.6751	77.0432	76.6302	76.6766	76.6259	76.8766	76.8898	77.3447	77.2383	77.2366	76.7035
167	P. juntendi	71.0126	70.8778	71.1266	69.1451	72.7494	74.5865	72.1093	74.6683	74.6799	73.9358	74.2801	74.1981	74.5511	74.6538	74.49	73.5467	74.6456	74.4154	74.4487	73.3376	73.2847	73.8266	73.818	73.3452	75.2204	74.7024	74.6683	74.2134	74.5614	74.7977	75.9079	76.1966	76.3933	72.8904	72.8284	73.4594	73.4973	77.5144	77.9218	77.5151	77.588	77.5229	77.7234	77.9607	78.284	78.1961	78.211	77.6871
168	P. alloputida	70.813	71.2316	71.0985	69.0383	72.6218	74.2642	71.8755	74.6006	74.5025	73.9133	74.3085	74.1425	74.4467	74.3859	74.3346	73.4432	74.4985	74.3287	74.3399	73.2511	73.2165	73.9616	73.2807	73.3915	74.7661	74.8137	74.7174	73.9172	74.3644	74.8105	75.8453	76.1542	76.0376	72.8065	72.6333	73.1636	73.2263	77.3358	77.9023	77.3744	77.4204	77.3546	77.6171	77.7393	78.1214	78.0993	78.1283	77.4328
169	P. putida	72.0056	71.769	71.0076	70.9844	73.1633	74.7804	72.6212	75.0861	75.0555	74.3163	74.7959	74.8145	74.9723	74.8888	74.8341	74.0398	74.9006	74.863	74.8311	73.8192	73.8758	74.3356	73.9178	73.8797	75.1021	75.1432	75.1765	74.5102	74.8557	75.1543	76.4325	76.5651	76.3245	73.1036	73.138	73.5784	73.7447	77.7692	78.0321	77.7132	77.9	77.6953	77.9764	78.04	78.4957	78.2954	78.5171	77.8911
170	P. kurunegalensis RW1P2	70.8675	70.974	70.9875	69.2522	72.6426	74.3724	71.9687	74.7106	74.7023	74.0673	74.4239	74.3344	74.6521	74.5212	74.4838	73.4837	74.5024	74.4105	74.3605	73.2664	73.2703	73.7789	73.3091	73.4596	74.8506	74.9029	74.6919	74.1502	74.4087	74.7334	76.0928	76.3256	76.2841	72.8751	72.8315	73.3987	73.4824	77.5182	78.1131	77.5333	77.6693	77.5629	77.7404	77.8771	78.2721	78.2901	78.3422	77.5769
171	P. kurunegalensis 170620603RE	71.7249	71.826	71.1235	70.7236	73.0301	74.7982	72.5764	74.8248	75.0607	74.3544	74.6477	74.4795	74.8193	74.7569	74.8385	73.9506	74.9081	74.8312	74.7269	73.442	73.548	74.2681	73.9098	73.8188	75.0467	75.1711	75.0589	74.4651	74.6742	75.1919	76.2159	76.5266	76.473	73.1238	73.1542	73.5056	73.7169	77.6639	78.1478	77.6964	77.6648	77.5057	77.9137	78.039	78.3561	78.2568	78.4518	77.7628
172	P. kurunegalensis 170918607	71.5975	71.8893	71.1482	70.7356	73.039	74.7732	72.4823	74.9359	75.0493	74.3676	74.6294	74.5097	74.9591	74.7777	74.8505	73.8502	74.8551	74.7975	74.6909	73.3977	73.4103	74.4016	73.8773	73.8427	75.075	75.0936	74.9796	74.5477	74.6525	75.2171	76.2502	76.5335	76.4451	73.0732	73.0912	73.4636	73.665	77.6185	78.1346	77.7063	77.6979	77.5287	77.9532	78.0406	78.4138	78.3162	78.4613	77.7644
173	P. kurunegalensis FDAARGOS171	71.9704	71.8634	71.1041	70.8901	73.0113	74.718	72.4546	74.9488	75.2502	74.5191	75.3186	75.0778	74.9649	75.1761	75.3086	74.1269	75.1336	74.8708	74.9274	73.6445	73.7843	74.3447	73.7219	73.8919	75.1341	75.1783	75.2219	74.5101	74.6391	75.1988	76.3065	76.4785	76.2675	73.1154	73.1247	73.4237	73.637	77.6018	78.2235	77.7648	77.83	77.6359	77.9267	78.0682	78.4402	78.331	78.4703	77.6957
174	P. kurunegalensis STW0522-72	72.0517	71.8114	71.1159	71.0049	73.125	74.8174	72.6749	75.0241	75.0057	74.579	74.9153	74.662	75.0783	74.9698	74.9915	74.0648	74.8032	74.9827	75.003	73.8662	73.9508	74.5208	73.7925	73.8949	75.0855	75.0776	75.0905	74.6078	74.6941	75.142	76.3322	76.4952	76.2155	73.2005	73.099	73.4696	73.6066	77.6925	78.2117	77.7068	77.7745	77.5452	77.8483	78.0501	78.4186	78.3094	78.499	77.7449
175	P. monteilii	70.3928	70.6805	71.1267	68.7069	72.5164	74.5786	71.7841	74.572	74.5428	73.842	74.9264	74.5484	74.4923	74.6066	74.863	73.2214	74.3913	74.2183	74.1783	73.0343	73.0724	73.5813	74.2552	73.3527	75.4465	74.7313	74.4887	74.1219	74.5479	74.5794	75.744	75.9315	76.6495	72.682	72.6477	73.2138	73.2082	77.3362	77.9992	77.563	77.4987	77.4472	77.7023	77.955	78.148	78.2244	78.0873	77.4371
176	P. oryzicola RD9SR1	71.603	71.4959	71.2233	70.0247	73.0487	74.7626	72.2406	74.9581	75.1632	74.2683	74.5846	74.5702	74.8374	74.7498	74.7176	73.7461	75.0928	74.7969	74.6851	73.4718	73.592	74.2208	73.6025	73.7211	75.3081	75.5015	75.0431	74.4433	74.7574	75.1026	76.3583	76.6983	76.5875	73.093	72.945	73.4689	73.599	78.1457	78.562	77.9463	78.0638	77.9718	78.1672	78.305	78.8361	78.7407	78.8186	78.0655
177	P. anuradhapurensis RD8MR3	70.9728	70.785	70.9998	69.1602	72.8185	74.634	72.2279	74.9812	74.9176	74.1571	74.6236	74.4795	74.7657	74.6532	74.5878	73.7344	74.9302	74.704	74.6397	73.3705	73.4627	74.1809	73.5509	73.5497	75.1683	75.0945	74.9597	74.287	74.6931	75.0923	76.408	76.8136	76.6281	73.0032	72.8492	73.5344	73.5356	78.2222	78.6401	78.0471	78.0242	78.0171	78.2979	78.3701	78.8264	78.8315	78.8368	78.1199
178	P. anuradhapurensis SK	71.6192	71.6911	70.9639	71.1553	73.2009	75.0922	72.6749	75.2602	75.3058	74.5974	75.031	74.8945	75.1189	75.253	75.2518	74.232	75.2862	75.1602	75.0959	73.7164	73.8222	74.6435	74.063	74.0945	75.5723	75.4726	75.342	74.6974	75.0683	75.468	76.7663	77.0716	76.7913	73.3046	73.3242	73.6625	73.9183	78.396	78.7912	78.3401	78.2959	78.1374	78.5921	78.6801	79.1231	79.0034	79.1275	78.4525
179	P. persica	70.7218	70.8496	71.0834	69.2008	72.9122	74.8574	72.0045	74.9824	74.9958	74.3186	74.7697	74.6424	74.8502	74.8064	74.7468	73.7017	74.7743	74.6964	74.6878	73.4234	73.3962	74.1987	73.6338	73.702	75.3472	75.2467	75.0162	74.3946	74.8634	75.172	76.5428	76.6857	76.6255	73.0271	72.9721	73.536	73.5875	78.4534	78.69	78.1448	78.2482	78.2024	78.4947	78.6049	79.0707	78.9908	79.0207	78.3194
180	P. inefficax	70.9906	70.9915	70.9233	69.8612	72.6575	74.7137	72.2433	74.9527	74.8728	74.1617	74.6644	74.5488	74.8451	74.7008	74.7378	73.7708	74.8792	74.6307	74.598	73.4682	73.5285	74.3124	73.5956	73.5402	75.2147	75.1453	75.0743	74.3741	74.7621	75.1849	76.383	76.6054	76.5216	73.0255	72.8504	73.5686	73.5971	78.0041	78.5038	77.9877	78.0703	77.9634	78.28	78.3834	78.7666	78.7818	78.8031	77.9337
181	P. shirazica	70.6406	70.7124	70.8985	68.9148	72.5978	74.6483	71.9995	74.796	74.868	74.2024	74.5731	74.504	74.7238	74.6333	74.6165	73.5034	74.6897	74.5822	74.5924	73.413	73.2511	74.0399	73.5183	73.6822	75.2535	75.0644	74.9799	74.1615	74.7109	74.9573	76.4458	76.5903	76.6129	72.9674	72.8142	73.508	73.5222	78.0756	78.5071	78.0294	78.0944	78.0241	78.2201	78.3236	78.8186	78.8942	78.7636	78.06
182	P. pyomelaminifaciens	70.651	70.7462	70.9642	68.6794	72.6241	74.5849	71.913	74.7587	74.7985	74.0637	74.588	74.4273	74.7499	74.7552	74.6741	73.5974	74.8777	74.6389	74.7451	73.2057	73.3273	74.0068	73.8704	73.5571	75.7017	75.0562	74.8626	74.0779	74.7227	74.9449	76.4826	76.6576	76.8365	72.9112	72.7751	73.4828	73.5085	78.0165	78.5592	77.9534	78.0785	77.9918	78.3439	78.5602	78.8896	78.9475	78.8431	78.0499
183	P. asiatica	71.3538	71.461	70.9429	70.1966	73.1557	74.9913	72.3822	75.1269	75.0867	74.3792	74.8038	74.7379	74.9232	75.001	74.8952	74.0382	74.9773	74.8997	74.8538	73.6535	73.7543	74.3483	73.8523	73.8074	75.4669	75.3202	75.2536	74.6806	74.9632	75.2518	76.6008	76.8935	76.6922	73.1906	73.1094	73.5101	73.7329	78.3325	78.5738	78.1115	78.253	78.118	78.3711	78.4351	78.9363	78.8607	78.9117	78.2715
184	P. graminis	70.5102	70.7231	71.0531	69.0737	72.2176	73.6905	71.4791	73.6264	73.8807	73.2667	73.6623	73.5274	73.7195	73.6497	73.6803	72.9055	73.6141	73.6376	73.5842	72.7847	72.7247	73.353	72.9025	73.025	73.9025	73.7529	73.8204	73.1788	73.5666	73.7708	74.8468	75.0484	74.9431	72.4217	72.2949	72.9149	72.9536	76.2706	76.6973	76.3626	76.3569	76.298	76.4029	76.4312	76.6474	76.7155	76.6486	76.2919
185	P. lutea	72.1481	71.8971	71.1478	71.0721	72.7253	74.0669	72.2556	73.9392	74.2251	73.7449	74.253	74.1778	74.2734	74.0852	74.1467	73.6007	73.9736	74.041	73.9132	73.2654	73.4578	73.8481	73.4659	73.3189	74.0678	73.9973	74.17	73.7859	73.9718	74.1608	74.8934	75.113	74.7861	72.7982	72.6837	72.9593	73.2339	76.1202	76.4075	76.2068	76.3639	76.1719	76.2414	76.3013	76.489	76.2976	76.4847	76.2752
186	P. bohemica	70.6716	70.9618	71.1041	69.1973	72.513	73.8007	71.6181	73.6487	74.1212	73.3244	73.9032	73.7925	74.0458	73.7557	73.7792	73.0423	73.7232	73.772	73.8446	73.1327	73.0132	73.4924	72.9987	73.024	74.0248	73.8869	73.8196	73.3807	73.8198	74.0075	75.0512	75.1144	75.083	72.6071	72.5194	73.1397	73.1228	76.166	76.7054	76.3223	76.4765	76.4296	76.4579	76.4988	76.627	76.5914	76.6475	76.1718
187	P. abietaniphila	70.299	70.778	71.1285	68.9924	72.4305	73.6268	71.7615	73.6432	73.9733	73.3417	73.6905	73.8107	74.024	73.949	73.7511	72.942	73.9069	73.814	73.7815	72.7687	73.1202	73.3198	73.4688	73.1797	74.4151	73.6982	73.9452	73.2791	73.7107	73.9694	74.7294	74.8432	75.0786	72.4573	72.4161	72.9257	72.977	76.0003	76.4611	76.2119	76.197	76.1265	76.1505	76.3138	76.3537	76.3539	76.3649	76.0474
188	P. caspiana	70.4927	70.9763	71.2597	69.2331	72.1505	73.2416	71.3334	73.1466	73.5176	72.9587	73.4028	73.22	73.3997	73.3015	73.2338	72.573	73.1303	73.2664	73.2924	72.6142	72.6055	73.1095	72.6246	72.8184	73.3979	73.3529	73.2072	73.0717	73.2209	73.334	74.0855	74.1729	74.1156	72.4553	72.3649	72.7375	72.8112	75.1172	75.3886	75.1807	75.2324	75.1982	75.3716	75.3262	75.2543	75.284	75.3613	75.0768
189	P. ovata	71.104	70.5903	70.9663	69.2272	72.4586	74.4474	71.9586	74.3419	74.5645	73.9444	74.4566	74.2904	74.4524	74.2977	74.2571	73.5424	74.6794	74.5726	74.573	73.3371	73.4825	74.0444	73.5107	73.5261	74.7687	74.6711	74.5087	73.8425	74.299	74.4532	76.0635	76.2961	76.2833	72.8697	72.8072	73.3633	73.399	77.2077	77.769	77.1688	77.3151	77.2095	77.6941	77.4923	78.0053	77.9877	77.9094	77.4198
190	P. cichorii	70.6632	71.0711	71.3603	69.2011	72.269	73.955	71.6243	74.0176	73.7712	73.5798	73.9863	73.7956	74.28	73.9276	73.882	73.3009	73.8717	73.9938	74.0212	73.1464	73.0916	73.8441	73.2152	73.241	74.0728	74.0836	74.0531	73.4995	73.969	74.0672	74.8651	74.9719	74.8586	72.6696	72.7338	73.1635	73.2189	75.9227	76.3438	76.1024	76.1625	76.1067	76.197	76.1933	76.2342	76.2125	76.1577	76.0479
191	P. floridensis	69.9924	70.6992	71.1398	69.1074	72.3231	73.8932	71.4543	73.7691	73.9135	73.5122	73.9813	73.7502	73.9498	73.8835	73.8816	73.084	73.7755	73.8896	73.9264	73.0126	72.963	73.5787	73.0594	73.1948	73.8259	74.0694	73.9336	73.5114	73.7493	73.9186	74.7651	74.9973	74.9412	72.6182	72.5697	73.0609	73.0718	76.0653	76.5447	76.1316	76.1767	76.1863	76.3367	76.3384	76.4734	76.4418	76.4232	76.0702
192	P. asturiensis	70.3324	70.7969	71.2142	69.2153	72.4242	73.8428	71.7222	73.8522	73.9467	73.3803	73.786	73.5636	73.946	73.7809	73.7712	73.2049	73.9096	73.8605	73.8534	73.1062	72.9811	73.3488	73.0534	73.0763	73.895	73.9707	73.8761	73.3535	73.7266	73.9384	74.7084	74.9026	74.9389	72.594	72.6538	73.0895	73.1288	76.0383	76.5386	76.1526	76.2331	76.1916	76.3463	76.3044	76.5024	76.5067	76.5041	76.1586
193	P. viridiflava	70.4969	71.0006	71.1898	69.094	72.5122	73.9107	71.5884	73.9169	74.0257	73.5181	73.946	73.748	74.0197	74.0011	73.9521	73.1825	73.8362	74.0068	73.9158	73.099	72.9867	73.5469	72.9862	73.0748	74.0859	74.0637	74.0306	73.6345	73.9026	73.9439	74.9584	75.1648	75.0434	72.5653	72.6281	73.0721	73.0643	76.2196	76.7145	76.3244	76.4224	76.3781	76.3519	76.4531	76.6279	76.6107	76.5198	76.2115
194	P. avellanae	70.531	71.0864	71.4965	69.372	72.6446	73.8419	71.882	74.0385	74.1217	73.8162	74.1334	73.9068	74.2593	74.0751	74.0139	73.3609	74.1826	74.1204	74.2061	73.1209	73.4164	73.7312	73.3152	73.4948	74.3199	74.242	74.1589	73.7167	73.9712	74.299	74.9341	75.0794	75.0658	72.858	72.8112	73.2131	73.2242	76.3439	76.7576	76.3874	76.5478	76.4658	76.5279	76.4769	76.7304	76.7359	76.6596	76.3044
195	P. cannabina	70.2761	70.9563	71.3266	69.1968	72.3226	73.6228	71.6628	73.6602	73.9138	73.5075	73.9338	73.7602	74.0528	73.8833	73.947	73.2119	73.8001	73.9757	73.9645	72.8611	73.017	73.4399	72.9181	72.9535	73.7213	73.9892	73.7324	73.4027	73.7955	73.9069	74.7425	74.7851	74.8247	72.5848	72.5089	73.0967	73.0868	76.0893	76.5649	76.1454	76.264	76.1505	76.3462	76.2871	76.512	76.3813	76.4032	76.1371
196	P. tremae	70.2938	70.5798	71.143	69.2005	72.0819	73.5692	71.4496	73.4579	73.6366	73.2838	73.6108	73.4071	73.7349	73.575	73.6165	73.0961	73.4985	73.6723	73.686	72.8294	72.8171	73.3114	72.8227	72.8971	73.6168	73.5303	73.5818	73.1631	73.4167	73.5241	74.4014	74.4479	74.4247	72.5589	72.4191	72.9173	72.8951	75.664	75.8728	75.7315	75.8246	75.7411	75.7785	75.7674	75.8605	75.8579	75.919	75.6554
197	P. coronafaciens	70.9179	71.2952	71.6402	69.4944	72.6922	73.9598	71.8724	73.9428	74.106	73.7505	74.0898	73.8771	74.2407	74.0732	74.0117	73.3305	74.0957	73.9586	74.0132	73.1763	73.3941	73.7182	73.2618	73.441	74.1983	74.1993	74.1579	73.7172	73.9911	74.1948	74.9285	75.0634	75.0184	73.0052	72.9232	73.3798	73.3915	76.0463	76.4233	76.0981	76.1984	76.1086	76.2692	76.2229	76.3171	76.3377	76.3618	76.0343
198	P. congelans	70.5025	70.9149	71.1369	69.0472	72.3687	73.8076	71.6493	74.098	74.0441	73.5172	73.914	73.6511	73.9334	73.8163	73.8485	73.2366	74.0193	73.9032	73.9246	73.0595	73.0833	73.5442	73.1137	73.2829	74.1381	74.0894	73.982	73.5257	73.8422	73.9831	74.789	74.8567	74.9119	72.6962	72.6154	73.1227	73.1792	76.1036	76.6225	76.1444	76.3438	76.2726	76.3898	76.3642	76.551	76.4862	76.4595	76.2004
199	P. cerasi	71.1275	71.5929	71.1677	70.2298	72.7133	74.0133	71.9767	74.0276	74.1894	73.7514	74.2698	73.9912	74.2128	74.0391	74.0891	73.3404	74.2603	74.1404	74.1265	73.3216	73.4845	73.9052	73.2665	73.4654	74.1223	74.2942	74.3502	73.6795	73.9836	74.1952	74.9218	75.0206	74.8681	72.8481	72.7832	73.0542	73.209	76.2079	76.6835	76.3041	76.3602	76.1585	76.4594	76.5038	76.5961	76.5153	76.5868	76.4178
200	P. syringae	70.4339	70.8593	71.2128	69.0483	72.3332	73.8047	71.5207	74.0509	73.9137	73.5121	73.9296	73.7168	74.0308	73.9516	73.9667	73.2417	73.9018	73.9285	73.9264	73.0934	73.0499	73.5953	73.0282	73.1205	74.1118	74.0152	73.9212	73.498	73.705	74.0182	74.7371	74.8357	74.814	72.6183	72.6741	73.1541	73.2023	76.1444	76.6533	76.2758	76.3585	76.2806	76.4736	76.445	76.542	76.5047	76.478	76.1855
201	P. caricapapayae	70.3209	70.725	71.0915	69.197	72.2497	73.6053	71.5989	73.6598	73.6582	73.4504	73.7814	73.6964	73.8186	73.7926	73.7417	73.0978	73.7714	73.8616	73.8262	72.9829	72.8376	73.397	73.0043	73.0018	73.6004	73.7346	73.6448	73.2792	73.5909	73.7759	74.343	74.442	74.492	72.5837	72.6409	73.0111	73.0173	75.7073	76.0812	75.7179	75.8983	75.8035	75.9061	75.8352	76.0001	75.9746	75.9655	75.7811
202	P. ficuserectae	70.5452	70.6924	71.1804	69.1478	72.2655	73.6626	71.3665	73.5481	73.8188	73.3776	73.7731	73.477	73.8251	73.6703	73.6829	73.0041	73.6069	73.768	73.8209	72.929	72.8467	73.3137	72.8048	73.0245	73.5818	73.6778	73.6645	73.0995	73.5129	73.6483	74.4857	74.6302	74.6201	72.6325	72.6317	73.0829	73.1439	75.7754	76.2487	75.8816	76.0389	75.9456	76.0602	75.9439	76.1189	76.182	76.1397	75.814
203	P. meliae	70.3256	70.7949	71.235	69.1684	72.3053	73.6142	71.52	73.6104	73.7528	73.2538	73.6306	73.3715	73.6978	73.5717	73.5879	72.9671	73.626	73.7365	73.7722	72.8332	72.8547	73.3821	72.9094	72.9968	73.7807	73.6511	73.7306	73.2259	73.4735	73.5944	74.7028	74.6898	74.6775	72.592	72.5881	73.059	73.0719	75.8181	76.2167	75.8808	76.0044	75.9404	76.0335	75.9453	76.1398	76.1915	76.1942	75.8157
204	P. savastanoi	70.4261	70.8943	71.15	69.0368	72.3346	73.534	71.6038	73.7358	73.7762	73.3751	73.7293	73.5574	73.8506	73.6441	73.6688	72.9389	73.6731	73.812	73.8281	72.8198	73.0351	73.4017	72.9613	73.0677	73.793	73.7673	73.7286	73.1486	73.4493	73.6429	74.5578	74.6505	74.6312	72.66	72.5928	73.02	73.0807	75.8073	76.1626	75.8215	75.9855	75.9044	76.0483	76.0364	76.1958	76.1403	76.1549	75.8574
205	P. amygdali	70.4389	70.7504	71.1243	69.3311	72.3362	73.5809	71.3735	73.6251	73.7273	73.2815	73.7121	73.5248	73.8622	73.7397	73.6738	73.0961	73.6936	73.7693	73.736	72.8492	72.9795	73.4518	72.8287	73.0241	73.7679	73.7692	73.7549	73.3065	73.6003	73.7489	74.6318	74.7338	74.6614	72.6155	72.5415	73.0074	73.0708	75.8191	76.1719	75.9284	76.0503	75.9859	76.058	75.9995	76.0608	76.0921	76.0944	75.7836
206	P. helleri	70.5709	71.2085	71.6048	69.2914	72.5654	73.3087	71.6835	73.2019	74.0506	73.2074	73.4346	73.4701	73.6893	73.5594	73.6764	72.9509	73.3084	73.6377	73.5763	72.6247	72.8221	73.1541	72.8448	72.7665	73.433	73.3671	73.3202	73.0295	73.3818	73.55	74.3985	74.6272	74.7007	72.3681	72.2911	72.7594	72.8346	75.5323	76.0079	75.7551	75.7495	75.668	75.7581	75.8047	75.976	75.9	75.9096	75.5553
207	P. endophytica	70.523	71.2856	71.7549	69.7716	72.3366	72.7973	71.3754	72.6613	73.4419	72.6578	72.8819	72.7639	73.0382	72.9965	72.98	72.4493	73.0383	72.9179	72.9312	72.0886	72.2748	72.5522	72.0723	72.2423	72.6069	72.6047	72.5685	72.4	72.6596	72.6251	73.2937	73.3094	73.2929	72.1365	72.0052	72.267	72.3212	74.1455	74.481	74.459	74.399	74.3992	74.3701	74.4181	74.4672	74.3874	74.4741	74.2543
208	P. lundensis	70.502	71.0276	71.5629	69.3665	72.4732	73.4149	71.6781	73.4228	74.0012	73.258	73.4793	73.4374	73.5378	73.4978	73.4827	72.8586	73.3059	73.4092	73.7663	72.5009	72.6603	73.1417	72.9496	72.8619	73.5695	73.3576	73.433	73.5314	73.4837	73.5033	74.4095	74.5581	74.4704	72.5243	72.4939	73.0302	73.0797	75.4535	75.7724	75.6574	75.6583	75.6348	75.6694	75.7292	75.9633	75.8611	75.9465	75.5079
209	P. weihenstephanensis	70.4858	71.2528	71.5888	69.4773	72.555	73.2002	71.7142	73.1489	73.8606	73.0938	73.2682	73.1264	73.2868	73.2714	73.2172	72.822	73.2681	73.2878	73.2349	72.5371	72.6425	73.0801	72.4917	72.6632	73.2558	73.1984	73.1114	72.9336	73.1137	73.2844	74.0504	74.2958	74.2093	72.3988	72.3864	72.7075	72.7431	74.9832	75.3351	75.217	75.2399	75.2231	75.3198	75.3402	75.4202	75.3559	75.4038	75.0586
210	P. taetrolens	70.5792	71.1485	71.5238	69.2871	72.4679	73.3635	71.497	73.4371	73.6968	73.2388	73.4254	73.3835	73.5734	73.4925	73.4811	72.9495	73.4376	73.458	73.5211	72.7758	72.7898	73.0096	72.6629	72.7851	73.4822	73.4015	73.3889	73.061	73.2601	73.3578	74.1137	74.3887	74.3501	72.5357	72.425	72.8305	72.9198	75.3471	75.5744	75.3958	75.4519	75.4514	75.5304	75.5136	75.6515	75.5631	75.586	75.3481
211	P. versuta	72.1802	72.1177	71.4541	70.9656	73.0055	73.9743	72.1692	73.71	74.4517	73.9593	74.1692	74.1032	74.2237	74.0625	74.3127	73.7199	74.0212	74.0361	74.0621	73.1498	73.4255	73.7375	73.3657	73.5056	73.7702	73.8409	73.9363	73.6772	73.8166	73.9664	74.6208	74.859	74.5315	72.8812	72.8367	73.032	73.2854	75.689	75.8805	75.7762	75.7939	75.5866	75.8788	75.8475	75.8884	75.7845	76.0455	75.7301
212	P. saxonica	70.413	71.1246	71.5892	69.3761	72.5027	73.0174	71.3849	72.9922	73.5884	72.9777	73.1496	73.1512	73.4789	73.2741	73.2627	72.7157	73.264	73.017	73.4081	72.4549	72.7503	72.7833	72.4261	72.4724	72.9311	72.983	72.9502	72.8582	72.9638	73.0297	73.695	73.7881	73.7551	72.402	72.2091	72.6303	72.7489	74.5994	74.7893	74.7337	74.7358	74.7405	74.9039	74.827	74.9037	74.8415	74.9142	74.6585
213	P. bubulae	70.7305	71.1444	71.5266	69.364	72.6776	73.7648	71.7251	73.7796	74.1033	73.4594	73.6749	73.5964	73.921	73.6801	73.7164	73.3141	73.8113	73.6482	73.7428	73.0598	73.1598	73.3075	73.0967	72.9784	73.7719	73.7301	73.7082	73.3759	73.6404	73.7641	74.7218	74.7998	74.7178	72.6489	72.7165	73.0813	73.1035	75.9409	76.1734	75.8984	75.9783	75.9555	76.0157	75.9092	76.125	76.1137	76.2226	75.9771
214	P. fragi	72.2998	72.1566	71.5957	71.0276	73.1243	74.4009	72.5645	74.4265	74.7501	74.3898	74.5759	74.406	74.6803	74.5222	74.6002	74.0552	74.5609	74.4956	74.8011	73.7892	73.7145	74.072	73.7361	73.8534	74.5834	74.4638	74.4599	74.0824	74.3404	74.5361	75.285	75.4469	75.1345	73.0897	73.9086	73.3025	73.5871	76.5386	76.7681	76.5953	76.6618	76.4811	76.591	76.5285	76.8829	76.6297	76.9174	76.6512
215	P. psychrophila	72.1624	72.1014	71.6901	71.0666	72.9621	74.0531	72.3638	73.815	74.385	73.9462	74.266	74.1823	74.5118	74.0877	74.3301	73.9821	74.3004	74.0738	74.0935	73.4828	73.522	74.0353	73.5939	73.5099	73.9838	74.1321	74.1213	73.881	73.9837	74.1732	74.663	74.7595	74.3986	72.9825	73.0172	73.1107	73.3916	75.7871	75.7624	75.7435	75.7912	75.5939	75.7397	75.7165	75.9565	75.6658	75.9596	75.733
216	P. deceptionensis	70.7331	71.1655	71.659	69.4181	72.5506	73.7362	71.5937	73.6232	74.0815	73.5193	73.7725	73.5673	74.0127	73.8332	73.7309	73.1856	73.7606	73.7009	73.7538	72.8524	72.9807	73.4172	72.9199	73.0027	73.7752	73.8016	73.6591	73.4119	73.5965	73.8158	74.5423	74.6715	74.6667	72.5474	72.6236	73.0776	73.0727	75.7346	76.0814	75.8943	75.8686	75.824	75.912	75.8389	76.184	76.0478	76.177	75.9351
217	P. batumici	71.0667	70.9638	71.0996	69.6031	72.9999	74.9286	72.1426	74.7649	74.5151	74.1399	74.713	74.5521	74.7336	74.6076	74.6274	73.7126	74.6755	74.5125	74.5042	73.5919	73.4503	74.246	73.4341	73.6007	75.1171	75.0258	74.8233	74.1247	74.6282	74.9356	76.3085	76.5616	76.4877	73.0158	72.9009	73.4875	73.5454	78.0545	78.4616	77.9516	77.9983	77.958	78.0443	78.0535	78.6269	78.4035	78.4683	78.2803
218	P. agarici	70.3426	70.7004	71.0009	69.0772	72.2896	74.1252	71.6183	73.8192	74.0225	73.5606	73.9025	73.8261	73.9797	73.9562	73.956	73.1687	73.9456	74.1557	74.131	73.0749	73.1016	73.597	73.1255	73.319	74.4087	74.2615	74.1516	73.7508	74.1848	74.3145	75.39	75.5149	75.4896	72.5879	72.5936	73.1244	73.0979	76.8744	77.271	76.7288	76.7703	76.7087	77.0399	76.9206	77.1096	77.159	77.1604	76.717
219	P. vanderleydeniana RW8P3	71.7342	71.7842	71.3561	70.3713	73.2043	74.9602	72.4008	75.0098	74.6509	74.2481	74.9147	74.6035	74.9164	74.613	74.6451	74.0179	74.7954	74.8731	74.8798	73.9672	73.7676	74.4102	73.8478	73.7983	75.2244	75.1391	74.9619	74.3266	74.9147	75.2245	76.3018	76.6315	76.6192	73.1621	73.1246	73.6967	73.7435	78.1195	78.6688	78.0636	78.039	77.9611	78.3556	78.352	78.7388	78.6211	78.6289	78.124
220	P. asplenii	71.7724	71.7095	71.2188	70.5046	72.9474	74.8326	72.1642	74.6889	74.5232	74.1245	74.5265	74.3724	74.6403	74.381	74.4095	73.8097	74.4833	74.677	74.5816	73.5714	73.7666	74.3332	73.7484	73.7907	75.0249	74.815	74.7577	74.2082	74.5618	74.9233	75.8753	76.1029	75.9156	73.0032	73.0036	73.4406	73.5323	77.6356	77.9661	77.603	77.5655	77.4112	77.9497	77.7952	78.1944	77.9781	78.0397	77.5048
221	P. fuscovaginae	72.1728	71.7386	71.2534	70.4455	73.0763	74.9009	72.2678	74.772	74.6487	74.2871	74.8055	74.7584	74.9273	74.7257	74.6634	74.0597	74.7645	74.9301	74.9204	73.751	73.8995	74.4785	73.8932	74.1115	75.1914	75.0362	75.0628	74.5644	74.942	75.3189	75.9425	76.0946	75.964	73.1261	73.1195	73.5183	73.7314	77.7553	77.927	77.5441	77.5477	77.4068	77.8589	77.7581	78.1581	77.9685	77.9674	77.6279
222	P. chlororaphis subsp. aurantiaca	71.4984	71.6406	71.3232	70.2773	73.0557	74.9806	72.2933	74.6904	74.808	74.3054	74.6064	74.4339	74.8885	74.6157	74.5968	73.9885	74.8167	74.5481	74.517	73.6566	73.4462	74.4289	73.7698	73.8662	75.0657	74.8573	74.7879	74.18	74.7598	75.013	76.057	76.4441	76.3018	72.9864	72.9599	73.4323	73.5817	78.0965	78.3388	77.8283	77.9221	77.8232	78.2019	78.1081	78.4512	78.424	78.5271	77.9774
223	P. chlororaphis subsp. aureofaciens	71.6868	71.485	71.2389	70.2157	72.8598	74.9954	72.3048	74.7683	74.721	74.2436	74.6657	74.4361	74.8329	74.461	74.5712	73.8353	74.8665	74.6643	74.6432	73.5955	73.5501	74.2536	73.6841	73.7202	75.0706	74.8988	74.8199	74.2529	74.7904	75.0045	76.1357	76.4328	76.2606	73.0057	72.914	73.4093	73.5995	78.1941	78.3343	77.7513	77.8383	77.7055	78.1274	78.1071	78.4527	78.4887	78.5772	78.0322
224	P. chlororaphis subsp. chlororaphis	71.4327	71.2895	71.264	70.225	73.0088	74.8425	72.2112	74.8609	74.8768	74.3289	74.6015	74.3818	74.6971	74.5296	74.644	73.8579	74.7216	74.6369	74.6101	73.662	73.687	74.3435	73.7208	73.9361	75.1447	74.7582	74.7507	74.1927	74.7238	75.0427	76.2296	76.5928	76.3886	73.0554	72.978	73.4469	73.6003	78.1114	78.5998	77.9343	77.9627	77.8815	78.1396	78.1726	78.6163	78.5577	78.64	78.1118
225	P. chlororaphis subsp. piscium	71.4616	71.4886	71.211	70.4591	72.968	74.9878	72.2461	74.8413	75.0732	74.5055	74.7894	74.605	74.8827	74.6706	74.8243	74.0017	74.9472	74.7643	74.7264	73.9045	73.7068	74.5048	73.9699	74.0151	75.2958	75.1409	75.0103	74.4242	74.9499	75.1602	76.1918	76.4391	76.2898	73.2134	73.0129	73.5813	73.6689	78.2178	78.6102	78.003	78.0789	78.0023	78.2935	78.3428	78.6923	78.6073	78.6616	78.1414
226	P. aestus	70.5697	70.4427	71.0061	68.3433	72.706	74.628	71.7707	74.3864	74.2821	73.8634	74.3654	74.1127	74.3598	74.2654	74.3479	73.3784	74.5374	74.4489	74.4584	73.3276	73.1714	73.7847	73.2914	73.4297	75.0197	74.883	74.7132	73.9024	74.4818	74.8141	76.1599	76.3937	76.3737	72.7538	72.6571	73.2898	73.3161	77.8762	78.2066	77.5418	77.6296	77.6238	77.8259	77.8147	78.4665	78.4249	78.4204	78.0091
227	P. aestus CMR5c	70.7121	70.6628	70.8692	69.2146	72.6859	74.6922	71.8837	74.5952	74.2839	73.9055	74.4771	74.2225	74.4786	74.4207	74.4774	73.4878	74.5291	74.5874	74.5851	73.3528	73.2501	73.8722	73.3941	73.422	75.1267	74.885	74.858	73.9856	74.5871	74.9428	76.2967	76.6187	76.5547	72.8632	72.7697	73.3181	73.39	77.8648	78.16	77.5973	77.6513	77.6304	77.9315	77.9033	78.5193	78.4002	78.445	78.0541
228	P. sessilinigenes CMR12a	71.0544	71.1828	71.674	69.2605	73.0157	75.09	72.239	74.7646	74.6767	74.2461	74.6797	74.4856	74.848	74.6615	74.6669	73.8113	74.8018	74.7265	74.6999	73.6761	73.5976	74.2147	73.669	73.7313	75.319	75.2712	75.0256	74.2813	74.9275	75.454	76.3621	76.5882	76.6168	73.4404	73.4556	73.9873	74.0096	78.1361	78.3664	77.8882	77.9819	77.9471	78.2351	78.0763	78.5197	78.4691	78.4542	78.1719
229	P. sessilinigenes BIOMIG1BAC	71.2735	71.3938	71.0639	70.181	72.9962	75.0516	71.9027	74.4397	74.1932	73.8442	74.3525	74.3906	75.0827	74.4663	74.5499	73.7489	74.5082	74.5337	74.7313	73.3453	73.7119	73.9536	73.4112	73.5819	74.7704	74.6151	74.6526	74.0764	74.6253	74.8047	75.8426	76.2032	76.0576	72.9789	72.9751	73.3218	73.47	77.7576	77.7786	77.3234	77.412	77.3506	77.5678	77.5109	78.0362	77.8805	78.0416	77.6243
230	P. protegens	71.2888	71.439	71.279	70.4195	73.0414	74.7854	72.2012	74.7073	74.7381	74.3755	74.7393	74.3597	74.7583	74.5233	74.587	73.8667	74.6711	74.4674	74.5235	73.5157	73.7196	74.2879	73.7428	73.8497	75.138	74.9899	74.8692	74.1504	74.8137	75.1872	76.1655	76.4723	76.3305	73.0043	72.9805	73.4194	73.5449	77.8471	78.1788	77.5863	77.7984	77.7104	78.0783	77.9965	78.3641	78.2958	78.4088	77.9623
231	P. saponiphila	71.843	71.7553	71.146	70.5956	73.0008	75.1196	72.3845	74.6772	74.6714	74.253	74.5775	74.2283	74.2555	74.3261	74.5773	73.884	74.0604	74.4371	74.1146	73.6455	75.0672	74.2559	73.716	73.2722	74.9574	74.8953	74.8746	74.3248	74.8373	74.9888	76.0797	76.4107	76.3128	72.9633	72.9706	73.3832	73.5418	77.7941	79.4294	77.6358	77.7286	77.6056	77.921	77.7896	78.4019	78.2289	78.4088	78.0055
232	P. mucidolens	71.408	71.5744	71.2774	70.2481	72.6841	74.138	72.0322	74.0124	74.314	73.6857	74.0989	73.7791	74.1424	73.8573	73.9477	73.5332	74.0166	73.9578	73.9754	73.2292	73.2484	73.7975	73.1603	73.3116	74.0662	74.0098	74.0115	73.5332	73.8469	74.1309	74.9291	75.1941	74.9331	72.6529	72.6107	72.9142	73.8096	76.1716	76.405	76.1816	76.316	76.1342	76.4826	76.3974	76.4147	76.369	76.4809	76.3894
233	P. brenneri	71.6381	71.7053	71.1338	70.8681	72.9349	74.3589	72.3391	74.2674	74.6238	74.0992	74.4104	74.1688	74.4917	74.287	74.4014	73.6362	74.3677	74.4126	74.271	73.5323	73.5275	74.0469	73.6185	73.4893	74.5583	74.4901	74.3913	74.1206	74.3195	74.778	75.8337	75.974	75.6767	73.0454	72.9085	73.2429	73.4548	76.8183	77.1623	76.8722	76.9716	76.7843	77.1123	77.0719	77.2383	77.1722	77.3168	77.0371
234	P. proteolytica	71.5953	71.8184	71.2269	70.8731	72.9654	74.5075	72.3079	74.315	74.5085	74.1025	74.4341	74.2078	74.5026	74.523	74.3476	73.7907	74.3278	74.4599	74.3116	73.4439	73.6789	74.0319	73.8521	73.646	74.5722	74.4542	74.4244	74.2011	74.4529	74.6729	75.4558	75.8432	75.6991	72.9613	72.8728	73.3423	73.5914	76.8828	77.1559	76.9457	77.0481	76.8701	77.1492	77.1432	77.2832	77.1178	77.2782	77.1212
235	P. shahriarae SWRI52	70.7113	71.3089	71.3972	69.1596	72.6639	74.1551	71.8973	74.1535	74.201	73.7203	73.942	73.8587	74.206	74.0004	74.0683	73.38	73.97	73.9948	74.0211	73.1469	73.032	73.5696	73.1041	73.2839	74.414	74.244	74.1826	73.5009	74.0387	74.3792	75.5483	75.6089	75.5317	72.6688	72.6257	73.103	73.1768	76.7834	77.1932	76.7904	76.9154	76.8721	77.1128	77.019	77.3252	77.2632	77.3421	76.9962
236	P. shahriarae PF08	71.6912	71.539	71.212	70.4759	72.8058	74.4299	72.1443	74.2157	74.4481	74.0059	74.2852	74.1998	74.5207	74.2396	74.3623	73.5392	74.3224	74.1775	74.1953	73.3267	73.4426	73.8198	73.4943	73.5639	74.6793	74.5933	74.3953	73.8984	74.3088	74.6321	75.6315	75.9055	75.6905	72.887	72.8342	73.1423	73.3225	76.9294	77.2882	77.0023	77.1363	76.9524	77.2356	77.2001	77.479	77.3341	77.5197	77.0844
237	P. gessardii	71.5918	71.7096	71.4284	70.4925	72.9398	74.6014	72.4253	74.8241	74.6424	74.074	74.5802	74.6197	74.6622	74.6377	74.825	73.8435	74.6843	74.4673	74.5656	73.5598	73.7749	73.9871	73.6284	73.6113	74.7233	74.4852	74.4657	74.0576	74.5071	74.8662	75.7691	76.0501	75.9479	73.0032	72.9836	73.2799	73.4589	77.024	77.3256	76.9987	77.0239	76.9385	77.1929	77.1731	77.5467	77.4123	77.506	77.3549
238	P. spelaei	70.4973	70.7945	71.2093	69.0756	72.5316	73.7569	71.569	73.7147	73.9789	73.428	73.7231	73.6108	73.8785	73.6434	73.7245	72.982	73.6851	73.7162	73.7017	72.8976	72.8781	73.4112	72.92	72.9789	73.9306	73.95	73.6914	73.228	73.6386	73.9274	74.9729	75.1231	75.1222	72.5734	72.4102	72.9221	73.0065	76.1618	76.5699	76.2223	76.3486	76.3502	76.5395	76.4362	76.7141	76.6177	76.6289	76.4016
239	P. karstica	70.7435	70.828	71.246	69.0573	72.3766	73.8261	71.586	73.7387	73.9237	73.4215	73.7349	73.4711	73.8158	73.9016	73.8485	73.1299	73.7306	73.6907	73.6939	73.003	72.8374	73.255	72.823	72.8591	73.954	73.694	73.5895	73.2005	73.5801	73.7336	74.7806	74.9129	74.8389	72.5491	72.4289	72.8894	72.9687	75.9795	76.3257	76.1242	76.232	76.2213	76.2503	76.2478	76.3641	76.3304	76.302	76.1747
240	P. yamanorum	71.5361	71.6024	71.3524	70.3649	72.812	74.2702	71.975	74.3375	74.4268	73.9427	74.1761	73.9664	74.2568	74.0934	74.1929	73.4893	74.3472	74.1744	74.1303	73.2712	73.3686	73.9297	73.3959	73.5289	74.2521	74.3563	74.2315	73.875	74.2061	74.537	75.4975	75.7158	75.4602	72.7852	72.6976	73.0033	73.2396	76.5739	77.043	76.8056	76.9286	76.7996	76.9272	77.0482	77.1206	77.0608	77.2348	76.9079
241	P. fildesensis	70.589	70.7624	71.2533	69.1147	72.5992	73.8915	71.8022	73.8536	74.3466	73.5534	73.8323	73.4973	74.0265	73.8617	73.8664	73.1601	73.9413	73.8597	73.8322	72.998	73.2089	73.4912	72.9675	72.964	74.1257	74.0902	73.9704	73.4461	73.7762	73.9121	75.2078	75.4234	75.3001	72.5462	72.3803	72.9552	73.036	76.626	77.0301	76.7517	76.849	76.85	76.8417	76.8325	77.1226	77.0584	77.072	76.7387
242	P. extremaustralis	71.5318	71.5742	71.1707	70.6701	72.9307	74.4292	72.1255	74.3575	74.3625	73.8933	74.158	74.1105	74.4665	74.3388	74.2287	73.6111	74.0869	74.2029	74.2593	73.2823	73.4423	73.8335	73.4175	73.644	74.5019	74.3341	74.2321	73.694	74.2926	74.2529	75.5822	75.8629	75.5879	72.8675	72.7173	73.0954	73.3693	76.9671	77.2652	77.0551	77.1334	76.9722	77.2584	77.2268	77.5377	77.4526	77.4519	77.1224
243	P. veronii	70.7184	70.9341	71.2664	69.2904	72.4971	74.087	71.8454	74.0607	74.5	73.5749	73.9804	73.9455	74.2454	73.9098	73.9569	73.1965	74.0029	74.0711	74.0841	73.0672	73.172	73.4849	73.0774	73.4576	74.2881	74.2292	74.2162	73.5076	74.0389	74.3445	75.4309	75.7479	75.6431	72.578	72.626	73.1417	73.1457	77.1309	77.4852	77.0372	77.186	77.1254	77.2702	77.0944	77.5854	77.6106	77.5369	77.2281
244	P. panacis	71.9208	71.7592	71.2165	70.8464	72.9545	74.5247	72.5281	74.4405	74.8876	74.1676	74.4917	74.4417	74.7647	74.4504	74.4909	73.9321	74.4976	74.5726	74.5421	73.6316	73.6436	74.1849	73.7415	73.8309	74.7105	74.7076	74.6783	74.0596	74.5041	74.8388	75.8029	75.999	75.7072	72.9429	72.9564	73.28	73.4775	77.3307	77.5485	77.2422	77.3466	77.1948	77.4705	77.2929	77.6691	77.5844	77.6456	77.4096
245	P. tolaasii	71.5778	71.5208	71.2784	70.3588	73.034	74.2022	72.2444	74.343	74.7373	73.9179	74.3393	74.095	74.4881	74.277	74.3439	73.4632	74.1723	74.1365	74.0965	73.3885	73.4059	73.9751	73.3662	73.3648	74.3071	74.2382	74.1185	73.8391	74.1724	74.4681	75.3445	75.5512	75.3197	72.8375	72.7731	73.158	73.3335	76.5468	77.1261	76.8341	76.913	76.8128	76.9854	76.976	77.2018	77.0213	77.1357	76.7716
246	P. palleroniana	71.7153	71.8267	71.2081	70.5157	72.8235	74.4009	72.1771	74.3332	74.4962	73.9292	74.3623	74.2397	74.4926	74.3699	74.3701	73.5056	74.2675	74.2887	74.2803	73.4441	73.4985	74.0614	73.6248	73.4596	74.482	74.503	74.3865	74.1081	74.2545	74.5627	75.4381	75.5668	75.3489	72.8314	72.7886	73.1229	73.3025	76.6665	77.0383	76.7759	76.9166	76.7364	76.992	76.9895	77.1747	76.9361	77.14	76.8474
247	P. costantinii	72.3727	72.1471	71.1238	71.4262	72.9579	74.1761	72.3683	74.1558	74.5978	73.9931	74.3726	74.2988	74.5248	74.1445	74.3808	73.6117	74.1045	74.2168	74.198	73.3208	73.4636	74.0675	73.5635	73.533	74.2106	74.305	74.2093	73.9914	74.1522	74.3927	74.9483	75.1831	74.8713	72.8057	72.7228	72.9975	73.3264	76.3187	76.5647	76.4417	76.6082	76.3569	76.5117	76.6356	76.7806	76.4883	76.7523	76.4322
248	P. kitaguniensis	70.5696	70.9387	71.4804	69.4258	72.5081	73.7542	71.8061	73.8314	74.2718	73.5192	73.8412	73.6807	74.0319	73.8991	73.9098	73.1555	73.6851	73.6493	73.605	72.862	73.0777	73.342	72.9928	73.0637	73.9521	73.8038	73.8419	73.4192	73.6518	73.9727	74.8148	74.8881	74.7967	72.4342	72.3944	72.9195	72.9239	76.2389	76.6891	76.4257	76.4748	76.4528	76.573	76.6715	76.8296	76.7493	76.7644	76.288
249	P. antarctica	71.5805	71.6423	71.27	70.5611	72.7701	73.9597	72.1061	73.7969	74.3259	73.7252	74.9443	73.901	74.1646	73.9427	74.0583	73.3677	74.0489	73.8429	73.8105	73.1521	73.3285	73.6703	73.241	73.3664	74.1423	74.2382	74.2343	73.7729	73.964	74.3038	75.0462	75.3369	75.0596	72.613	72.5881	72.8792	73.0543	76.4022	76.7193	76.5223	76.5939	76.4689	76.6351	76.7477	76.9107	76.7529	76.9078	76.5016
250	P. fluorescens	70.6596	70.9725	71.2476	69.4826	72.4104	73.9076	71.7249	73.8368	74.2816	73.5289	73.9363	73.8103	73.9958	73.7941	73.8025	73.1699	73.8002	73.7611	73.7123	73.5511	73.0867	73.4893	73.0805	73.195	74.0641	74.0023	73.8716	73.5412	73.8322	74.0721	75.1165	75.2209	75.1579	72.5592	72.497	72.9623	73.0028	76.2644	76.7471	76.561	76.6328	76.5217	76.639	76.6148	76.8788	76.7864	76.8992	76.5828
251	P. edaphica	70.7083	70.9959	71.535	69.5053	72.7996	73.946	71.8247	73.7976	74.3128	73.7482	73.9932	73.8162	74.1214	73.941	73.9991	73.2842	73.9811	74.0199	73.9486	73.0946	73.063	73.5099	72.9579	73.2285	74.1694	74.0946	73.8542	73.4756	73.9653	74.1254	75.1571	75.3511	75.2757	72.5649	72.549	73.0435	73.0491	76.4406	77.0014	76.5954	76.7233	76.6426	76.6967	76.8092	76.9992	77.0081	77.0532	76.5906
252	P. edaphica OE 28.3	70.6493	71.0369	71.4152	69.2564	72.6404	73.924	71.7978	73.7381	74.2158	73.6404	73.9311	73.7993	73.9887	73.8626	73.8593	73.081	73.8566	73.8507	73.8635	72.9156	73.118	73.4745	73.013	73.0924	74.0644	73.9966	73.7582	73.3933	73.7862	73.8665	75.0618	75.2827	75.2262	72.503	72.5585	73.0343	73.0904	76.4168	77.0122	76.6246	76.656	76.6473	76.8422	76.8531	77.0822	77.0533	77.0664	76.5241
253	P. salomonii	72.6305	72.3725	71.4227	71.4412	73.1429	74.6682	72.6861	74.5491	74.9483	74.3487	74.6878	74.523	74.7316	74.7072	74.654	73.9211	74.3355	74.4859	74.406	73.8763	73.7486	74.3544	73.7509	73.876	74.4779	74.6006	74.5228	74.1914	74.4355	74.7383	75.47	75.672	75.3602	72.9355	72.9131	73.2123	73.421	76.8374	77.1645	76.8343	76.9473	76.7053	77.047	77.0386	77.349	77.1199	77.2873	76.9713
254	P. aylmerense	71.249	71.3699	71.1992	69.9416	72.7718	74.0944	72.018	74.2199	74.5492	73.9107	74.1326	74.1864	74.3675	74.3252	74.2872	73.5694	74.2319	74.2737	74.2657	73.3444	73.3499	73.8169	73.3419	73.5001	74.564	74.421	74.2481	73.7963	74.2479	74.5105	75.4816	75.7191	75.5573	72.6076	72.5518	73.0441	73.1599	77.0023	77.3369	77.0908	77.1598	77.0329	77.2831	77.2498	77.4408	77.4161	77.4836	77.1224
255	P. cremoris	70.5275	70.6571	71.2024	69.1953	72.3581	73.7266	71.5383	73.692	74.0558	73.4626	73.8129	73.5605	73.9239	73.6683	73.806	73.0477	73.6905	73.6523	73.7312	72.728	72.9121	73.2763	72.7428	72.8913	74.0519	74.0587	73.8603	73.2415	73.7368	73.9968	75.1051	75.2537	75.1876	72.4027	72.3906	72.8551	72.878	76.3802	76.8089	76.5226	76.5488	76.5117	76.6818	76.7146	76.8482	76.9075	76.8283	76.4596
256	P. nabeulensis	70.689	71.5589	71.4035	68.9404	72.4697	73.8124	71.8662	73.9538	74.3401	73.5466	73.8403	73.8454	74.0621	73.762	73.9724	73.1715	73.8357	73.8076	73.9128	72.8651	73.0505	73.2806	72.9748	73.0796	74.1938	74.0988	74.0614	73.5116	73.9808	74.0811	75.1806	75.4597	75.4398	72.5936	72.4756	73.0006	73.0291	76.5024	76.939	76.667	76.7334	76.7121	76.8836	76.7869	77.03	76.9388	76.9055	76.8296
257	P. kairouanesis	70.6612	71.0156	71.3376	69.1916	72.5335	73.9887	71.9206	74.074	74.2464	73.4882	73.9765	73.8716	74.1871	74.0894	74.023	73.1582	73.9175	73.9006	73.8969	72.9059	73.0134	73.4484	73.1104	73.2134	74.2348	74.2449	74.1048	73.564	73.8412	74.1734	75.2834	75.4621	75.4099	72.5779	72.608	73.0668	73.0916	76.548	77.5079	76.8242	76.9699	76.9259	76.967	76.9244	77.2383	77.2297	77.1435	76.7934
258	P. pisciculturae	70.6244	70.7071	71.3916	68.9017	72.5174	73.7036	71.7146	73.7831	74.1082	73.474	73.8858	73.7662	73.9439	73.9129	73.9395	72.9679	73.7279	73.7696	73.7445	72.9347	73.0272	73.3739	72.9391	73.0478	74.0779	73.9022	73.8617	73.4708	73.6905	73.9508	74.9353	75.1483	75.0595	72.5069	72.4386	72.9436	72.9484	76.2288	76.7713	76.5228	76.5166	76.4963	76.6356	76.6055	76.9519	76.8769	76.8546	76.5343
259	P. tritici SWRI144	70.5557	70.9969	71.4342	68.9197	72.4919	73.7824	71.6424	73.8746	74.2352	73.5688	73.8805	73.8688	73.9996	73.8214	73.8888	73.1416	73.787	73.8228	73.8636	73.0012	73.1745	73.4468	73.0251	73.0738	74.1141	74.0764	73.9099	73.4702	73.9094	74.0784	75.0346	75.2222	75.1621	72.6595	72.5129	73.0173	73.0597	76.4176	76.8177	76.6006	76.667	76.5957	76.7877	76.7642	76.9529	76.9305	76.9295	76.5903
260	P. tritici SWRI145	70.7272	71.0637	71.536	69.1024	72.6069	73.9106	71.7849	73.8745	74.2639	73.5836	73.9135	73.7712	74.0612	73.8319	73.8862	73.0662	73.8608	73.8778	73.8232	73.0261	73.0964	73.4485	72.8515	73.0692	74.0832	74.0283	73.7683	73.3715	73.7802	74.0378	75.0045	75.2008	75.2013	72.5222	72.4065	72.8434	72.8541	76.3971	76.9057	76.5521	76.6888	76.5661	76.8619	76.7568	76.9673	76.9781	76.9699	76.5218
261	P. cedrina subsp. cedrina	71.3906	71.5509	71.2546	70.4565	72.8859	74.2436	72.2617	74.4027	74.5096	73.914	74.4533	74.2551	74.5243	74.289	74.4299	73.7336	74.3352	74.3066	74.2542	73.4968	73.321	73.8785	73.2968	73.4801	74.4672	74.6248	74.2902	73.8246	74.3116	74.5813	75.5117	75.6913	75.5305	72.745	72.6918	73.1101	73.2353	76.937	77.3965	76.99	77.1735	76.9396	77.2619	77.2379	77.6701	77.5026	77.4997	77.1662
262	P. cedrina subsp. fulgida	70.9316	71	71.4707	69.0952	72.7671	74.3732	71.8446	74.2134	74.3858	73.7272	74.0855	73.9501	74.2436	74.1759	74.1054	73.2951	74.1552	74.0997	74.1036	73.2865	73.3379	73.6915	73.2309	73.3304	74.6124	74.3752	74.2349	73.8269	74.2134	74.4625	75.5071	75.8113	75.7981	72.7419	72.6023	73.098	73.1296	77.1159	77.5013	77.0939	77.1679	77.1554	77.2835	77.3145	77.6268	77.6022	77.5719	77.1897
263	P. azadiae SWRI103	70.539	70.9184	71.3803	69.056	72.7675	74.1375	71.8556	74.0159	74.2397	73.6556	74.2111	74.1116	74.3159	74.2511	74.2495	73.3028	73.9626	74.1405	74.111	73.1594	73.1646	73.4374	73.1501	73.1755	74.4426	74.3565	74.1569	73.7873	73.992	74.3337	75.4738	75.6631	75.6249	72.6573	72.5687	73.0939	73.174	76.8696	77.3318	77.0274	77.048	77.0243	77.2229	77.2836	77.5107	77.5047	77.4763	76.9866
264	P. lurida	71.5273	71.5815	71.2155	70.2771	72.7782	74.1447	72.0722	74.4089	74.4095	73.9239	74.2392	74.1446	74.5348	74.2898	74.3373	73.5319	74.2947	74.2347	74.2476	73.2459	73.1064	73.8259	73.4525	73.4866	74.2965	74.366	74.3948	73.8754	74.1226	74.4317	75.3545	75.5298	75.3001	72.7264	72.6627	72.935	73.1732	76.632	77.0003	76.7526	76.7874	76.6808	76.986	76.932	77.1855	77.0234	77.1875	76.9183
265	P. simiae	71.955	71.7617	71.2658	70.8593	73.0675	74.3591	72.2941	74.4012	74.6369	74.1049	74.4074	74.2457	74.5505	74.3881	74.324	73.6773	74.2438	74.3525	74.3135	73.4712	73.5282	74.0091	73.6895	73.7143	74.4514	74.4386	74.3884	74.1121	74.2308	74.583	75.4076	75.5656	75.3003	72.8235	72.8028	73.0497	73.317	76.5655	76.9948	76.8096	76.8622	76.7458	76.8803	76.9618	77.1671	77.0279	77.2319	76.8907
266	P. canadensis	71.9857	71.7299	71.468	70.7206	72.9503	74.2278	72.272	74.4012	74.7536	74.1211	74.4912	74.4565	74.5514	74.3835	74.3675	73.8283	74.4538	74.4633	74.4385	73.4295	73.5968	74.1316	73.7895	73.7564	74.5591	74.4891	74.5528	74.0784	74.3534	74.6346	75.471	75.6629	75.4673	72.7844	72.7591	73.0894	73.3287	76.6351	77.0949	76.8548	76.9317	76.7742	76.953	76.9573	77.2766	77.0871	77.2312	76.8215
267	P. extremorientalis	70.9034	70.9142	71.2071	69.2635	72.7136	74.0565	71.7515	74.2568	74.2628	73.7649	74.3374	74.1367	74.2832	74.1769	74.2133	73.2869	74.1282	74.0743	74.0935	73.2487	73.3016	73.814	73.2429	73.3921	74.4434	74.3331	74.2389	73.6589	74.0667	74.3819	75.5351	75.6109	75.5336	72.6553	72.6083	73.071	73.0957	76.8259	77.2351	77.0121	77.0564	76.964	77.1754	77.1416	77.4581	77.4267	77.4195	77.0119
268	P. allii	70.8724	70.9386	71.309	69.0145	72.6762	74.1162	71.9047	74.0857	74.2791	73.6197	74.0479	73.9176	74.1047	74.0618	74.0462	73.2144	73.9526	74.0054	74.0187	73.0492	73.0779	73.6536	73.2079	73.199	74.2343	74.184	74.1837	73.4942	73.9105	74.2594	75.3636	75.5046	75.4606	72.74	72.6297	73.0893	73.124	76.7868	77.2679	76.951	77.0618	76.9906	77.2001	77.0641	77.4894	77.315	77.3325	76.9723
269	P. azotoformans	71.4221	71.374	71.2194	70.4924	72.8647	74.265	72.1145	74.2333	74.4501	73.9499	74.416	74.3021	74.4849	74.4206	74.3695	73.5995	74.2814	74.335	74.2792	73.2512	73.4612	73.8977	73.3336	73.4526	74.5314	74.3945	74.371	73.8644	74.2142	74.5432	75.4946	75.6787	75.5014	72.7908	72.7522	73.1177	73.2978	76.9033	77.3297	77.0769	77.1313	77.0718	77.3463	77.4096	77.5162	77.3879	77.5316	77.0682
270	P. rhodesiae	71.2809	71.4694	71.2839	70.1364	72.7908	74.1463	72.1381	73.993	74.4374	73.8939	74.022	74.0457	74.6412	74.3064	74.1861	73.408	74.1839	74.1091	73.9905	73.0702	73.4253	73.7429	73.8811	73.3291	75.0054	74.2264	74.1271	73.6684	74.1894	74.2692	75.0967	75.4361	75.8485	72.6851	72.6988	73.0109	73.1431	76.5856	76.9188	76.5653	76.665	76.5991	76.8789	76.9972	77.1211	76.9758	77.1021	76.803
271	P. asgharzadehiana SWRI132	70.8261	70.8943	71.2509	69.2519	72.5016	73.82	71.7221	73.7478	74.0425	73.3895	73.7707	73.6076	73.9275	73.8018	73.7514	72.9853	73.7134	73.7831	73.7612	72.8259	72.9764	73.3064	72.8706	73.0109	74.0473	74.0623	73.9224	73.4148	73.7321	73.9372	75.0784	75.357	75.2224	72.4679	72.3507	73.0039	73.0333	76.5305	76.9219	76.6187	76.6097	76.5596	76.876	76.7832	77.0236	77.0157	76.9908	76.6683
272	P. sivasensis	70.4238	70.9037	71.4019	69.503	72.4022	73.7961	71.4836	73.7452	74.0144	73.3448	73.636	73.555	73.7737	73.5137	73.6268	72.7572	73.5977	73.6069	73.6074	72.7632	72.6954	73.2092	72.8524	72.7964	73.9497	73.9116	73.6405	73.3228	73.6222	73.8335	74.9289	75.0495	75.0081	72.3847	72.4023	72.9368	72.9861	76.142	76.6465	76.3833	76.4022	76.3264	76.3628	76.4174	76.6788	76.6546	76.63	76.2654
273	P. cyclaminis	70.548	70.8475	71.2176	69.0812	72.5422	73.8801	71.6184	73.8966	74.169	73.4428	73.8456	73.7496	74.0274	73.8943	73.7441	73.0843	73.6788	73.8508	73.886	72.9982	72.9429	73.4492	72.9396	73.0151	74.0147	74.1224	73.8594	73.4243	73.6738	74.0604	75.2607	75.4723	75.4107	72.5059	72.3939	72.9553	72.9963	76.6569	77.0709	76.7338	76.8398	76.7512	76.8542	76.8336	77.1169	77.0768	77.0586	76.7043
274	P. marginalis	71.9334	71.9851	71.2172	71.0278	73.0079	74.4485	72.3964	74.5736	74.7492	74.2556	74.6569	74.4051	74.7918	74.5481	74.7024	73.9241	74.5927	74.5986	74.5836	73.616	73.6337	74.2357	73.5952	73.575	74.6327	74.789	74.7338	74.1451	74.5156	74.9332	75.4661	75.7932	75.5312	72.8204	72.8098	73.1065	73.4482	76.9796	77.2525	77.0879	77.1814	76.9845	77.2892	77.3052	77.6077	77.4089	77.4893	77.2216
275	P. grimontii	71.8053	71.9973	71.1475	70.8674	73.1555	74.3954	72.3565	74.3288	74.4956	73.8246	74.3826	74.2398	74.5974	74.1966	74.2255	73.6995	74.2986	74.46	74.3856	73.4655	73.6527	73.8833	73.3449	73.569	74.3516	74.3504	74.5405	73.6807	74.1739	74.5637	75.4886	75.7399	75.4735	72.8401	72.6874	73.0241	73.2726	76.9078	77.2313	77.0177	77.1246	76.9444	77.1818	77.118	77.4276	77.2353	77.3304	77.0824
276	P. trivialis	70.6001	70.765	71.2776	69.3268	72.5371	74.0881	71.8409	74.151	74.3486	73.7755	74.0296	73.8846	74.2739	74.1899	74.0507	73.3525	74.156	74.0484	73.9553	73.1882	73.2349	73.6017	73.319	73.4046	74.6269	74.4014	74.3887	73.8154	74.0787	74.3633	75.4303	75.7239	75.6795	72.6587	72.6474	73.0883	73.1599	76.9758	77.4777	77.1113	77.1351	77.1083	77.2469	77.2333	77.6905	77.5452	77.5486	77.1401
277	P. poae	71.8424	71.5291	71.2768	70.2558	72.8863	74.3293	72.2555	74.3296	74.6164	74.081	74.3737	74.318	74.6438	74.4507	74.4064	73.7023	74.4441	74.4109	74.2197	73.4265	73.657	74.1657	73.5705	73.7887	74.7342	74.6015	74.5346	73.9302	74.3055	74.6178	75.5345	75.7691	75.5953	72.7737	72.6783	73.2069	73.333	77.0975	77.4169	77.1547	77.2341	77.0865	77.3091	77.301	77.5534	77.4808	77.5461	77.0807
278	P. orientalis	71.9757	71.8465	71.2375	70.8311	73.1458	74.6157	72.4562	74.5707	74.7344	74.3019	74.6169	74.3587	74.6715	74.5599	74.5411	74.0278	74.6165	74.5396	74.5596	73.7488	73.6286	74.3301	73.6119	73.7371	74.7597	74.7477	74.6705	74.1949	74.5409	74.8727	75.6942	75.9998	75.788	72.9759	72.8995	73.1702	73.4195	77.0994	77.5736	77.1915	77.228	77.0811	77.3186	77.3218	77.5878	77.4486	77.5981	77.2064
279	P. haemolytica	70.6502	70.8214	71.2031	69.135	72.5165	73.8922	71.7584	73.8571	74.0994	73.5445	73.7089	73.6387	73.9239	73.8566	73.8416	73.1747	73.6798	73.8463	73.7921	73.0009	72.9951	73.4445	72.9947	73.089	74.1615	74.0076	73.9463	73.3614	73.7993	74.0646	75.105	75.324	75.3305	72.4918	72.5072	72.9991	73.039	76.4092	76.9659	76.5913	76.6542	76.6115	76.6659	76.7377	76.9927	76.9118	76.9198	76.5275
280	P. khavaziana SWRI124	70.7699	70.9197	71.2179	69.1469	72.6219	74.0261	71.689	73.8809	74.2075	73.4887	73.8831	73.7998	74.2222	74.1077	74.1174	73.2116	73.8612	73.9532	73.9877	73.0428	73.1658	73.5919	73.0614	73.2522	74.1492	74.1441	73.8139	73.4856	73.8901	74.2515	75.2507	75.55	75.4719	72.5237	72.5243	73.0397	73.1375	76.4469	76.8825	76.6155	76.6468	76.6184	76.797	76.7133	77.0297	76.9542	76.9907	76.7882
281	P. libanensis	71.6489	71.8853	71.2947	70.7549	72.9573	74.3475	72.3206	74.3792	74.5606	74.2769	74.5459	74.3637	74.711	74.6348	74.5192	73.8549	74.3678	74.52	74.5749	73.6369	73.6548	74.2415	73.6746	73.6534	74.5947	74.7677	74.4884	74.1498	74.5283	74.744	75.6757	75.8851	75.6147	72.9226	72.8554	73.138	73.3429	76.7613	77.1231	76.8476	76.8969	76.7495	76.9945	76.988	77.2838	77.07	77.3011	76.9721
282	P. synxantha	72.0147	71.7184	71.0814	70.8167	72.8148	74.2273	72.2116	74.3336	74.4677	73.9137	74.2656	74.1516	74.5047	74.2567	74.4048	73.8213	74.3968	74.3848	74.318	73.4319	73.4289	73.9717	73.433	73.4656	74.6447	74.453	74.5207	73.9525	74.3063	74.7062	75.361	75.5473	75.2607	72.8214	72.8056	73.0857	73.3391	76.7047	77.0166	76.8173	76.921	76.7277	76.9026	76.951	77.2058	77.0003	77.2706	76.9252
283	P. paralactis	70.4982	70.886	71.3212	69.2931	72.5509	73.819	71.7982	73.8244	74.1452	73.5932	73.9706	73.6931	74.01	73.9507	73.9351	73.228	73.8834	73.784	73.8789	73.1316	73.0271	73.4016	73.0111	73.1447	73.9891	73.9833	74.0016	73.5201	73.8483	74.0175	75.2027	75.4166	75.3472	72.6346	72.6654	73.1467	73.156	76.3066	76.8586	76.6213	76.6765	76.6458	76.7813	76.755	76.9921	76.9156	77.0014	76.6125
284	P. carnis	70.8885	70.8446	71.3088	69.277	72.601	73.9126	71.6875	73.9116	74.1708	73.6124	73.9362	73.8002	74.0016	74.0004	74.0278	73.1037	73.9304	73.9497	74.0525	73.0145	73.2273	73.5692	72.9967	73.0951	74.178	74.154	73.9598	73.4117	74.0666	74.1821	75.2617	75.5665	75.4108	72.6794	72.5605	73.0362	73.0981	76.516	76.9924	76.6465	76.7475	76.7086	76.8375	76.878	77.1716	77.1077	77.5998	76.7916
285	P. carnis SWRI22	70.9366	71.0618	71.3789	69.7735	72.7461	73.998	71.8165	74.1767	74.3135	73.7115	74.1488	74.0154	74.2367	74.1506	74.1163	73.4465	74.0457	73.9584	74.023	73.162	73.2713	73.5761	73.1622	73.286	74.2831	74.2785	74.1626	73.6438	74.0729	74.3696	75.3269	75.5333	75.4984	72.7192	72.6133	73.1393	73.1908	76.5423	77.0912	76.7344	76.8065	76.7435	76.8629	76.8611	77.2115	77.0996	77.1121	76.7961
286	P. paracarnis	70.8251	71.0282	71.4006	69.307	72.6378	73.9481	71.7873	74.1064	74.3019	73.7161	74.0664	73.8261	74.2241	74.0804	74.0818	73.2743	74.0063	73.9171	73.9261	73.0925	73.2538	73.7175	73.7074	73.236	74.7136	74.2407	74.102	73.7464	74.1128	74.336	75.2625	75.5312	75.7691	72.6559	72.6237	73.1095	73.1569	76.6163	77.1531	76.7693	76.8568	76.8244	76.8293	77.0948	77.2187	77.1266	77.1293	76.8625
287	P. lactis	70.5225	70.8957	71.2467	69.0254	72.4138	73.9122	71.7864	73.7931	74.2092	73.4292	73.8676	73.5549	73.9324	73.8296	73.8274	73.1106	73.9149	73.7316	73.7481	73.0042	73.1838	73.4092	73.4923	73.0002	74.7476	74.0246	73.8833	73.7121	73.7864	74.0218	75.0735	75.4499	75.6379	72.5877	72.5817	73.1418	73.2156	76.5252	76.9593	76.6756	76.7954	76.7488	76.8371	77.0638	77.1296	76.9909	77.0612	76.836
288	P. salmasensis SWRI126	70.8499	71.0851	71.3799	69.4233	72.5982	74.0586	71.8863	73.9362	74.2928	73.7202	73.9496	73.8046	74.1924	73.9884	73.9798	73.2045	74.0345	73.9809	73.9399	73.2552	73.2109	73.5914	72.949	73.2245	74.3383	74.3472	74.0929	73.4665	73.9711	74.3032	75.2953	75.6845	75.5377	72.6671	72.6095	73.1245	73.155	76.6229	77.1858	76.8017	76.9032	76.8851	76.9986	76.9809	77.3158	77.2211	77.2465	76.8081
289	P. kielensis	70.4898	70.9456	71.2489	69.2301	72.4618	74.2484	71.7517	74.0875	74.2934	73.8346	74.032	73.7973	74.1961	74.0596	73.9637	73.2515	73.9256	74.024	73.9769	73.0753	73.1025	73.6284	73.136	73.2377	74.5427	74.2761	74.2817	73.649	74.113	74.4399	75.7026	75.9545	75.9123	72.7256	72.5842	73.1433	73.1639	77.2814	77.6352	77.095	77.1908	77.179	77.3211	77.2095	77.5736	77.6268	77.619	77.1666
290	P. mediterranea	71.5803	71.3682	70.9654	70.3297	72.9411	74.8169	72.0367	74.4281	74.4691	74.0035	74.3452	74.2463	74.4777	74.4291	74.3536	73.7096	74.4368	74.5586	74.5153	73.6292	73.4207	74.0991	73.693	73.6769	74.8669	74.6194	74.6155	74.2009	74.5104	74.8583	75.9947	76.0762	75.9479	72.9173	72.846	73.2968	73.4405	77.5035	77.7124	77.2869	77.3724	77.2819	77.502	77.4993	77.8683	77.7934	77.8173	77.6044
291	P. corrugata	70.7681	70.7957	71.1455	68.8726	72.5868	74.2311	71.7271	73.9871	74.0654	73.7023	74.1188	73.808	74.199	74.0432	74.0917	73.2886	73.9492	74.0933	74.1333	73.2079	73.1359	73.8404	73.1412	73.2114	74.4648	74.248	74.1739	73.7013	74.0842	74.4062	75.5579	75.7021	75.6652	72.7073	72.7657	73.2401	73.3664	76.8971	77.2545	76.8958	77.0015	76.9948	77.0222	76.9402	77.4287	77.3764	77.4107	77.0171
292	P. viciae	71.2333	71.5474	71.0675	70.2846	72.8272	74.4233	72.2773	74.3913	74.3464	74.0574	74.3342	74.19	74.3644	74.1626	74.2413	73.6649	74.2883	74.3976	74.3751	73.3099	73.3763	74.0505	73.5926	73.5725	74.5129	74.4182	74.4158	73.9961	74.2572	74.704	75.5878	75.9266	75.7007	72.9741	72.9027	73.3581	73.5269	76.9358	77.3047	76.9231	77.0677	76.9328	77.1519	77.0856	77.4827	77.2846	77.4046	77.2068
293	P. tehranensis SWRI196	70.6945	71.1978	71.4177	69.2725	72.7791	74.4165	71.9837	74.2361	74.217	73.6628	74.2318	73.9521	74.2122	74.1769	74.0722	73.3583	74.1859	74.0826	74.0596	73.1764	73.2547	73.6993	73.2501	73.2855	74.4985	74.35	74.2731	73.7722	74.1533	74.3049	75.4691	75.7171	75.6025	72.8122	72.7973	73.3718	73.3993	76.7791	77.1906	76.8153	76.9259	76.9041	77.0594	77.0369	77.2795	77.2186	77.2073	76.9443
294	P. alvandae SWRI17	70.5146	70.7754	71.13	68.8785	72.3808	74.2713	71.7683	74.0077	74.2099	73.5535	73.9611	73.8675	74.0975	73.9469	73.94	73.1683	73.9545	73.902	73.8922	72.9115	72.9789	73.6334	73.0135	73.1817	74.4189	74.1729	74.0648	73.5202	73.891	74.2004	75.4593	75.781	75.6924	72.7247	72.5814	73.0334	73.0971	77.0183	77.456	76.9899	77.1283	77.1228	77.3099	77.1079	77.4545	77.4815	77.4357	77.136
295	P. alvandae Pf29Arp	70.9898	70.8049	71.1468	68.7444	72.5445	74.3828	71.8236	74.2051	74.1956	73.6968	74.0241	73.8707	74.2143	74.0613	74.0724	73.4463	73.9958	74.2203	74.1606	72.9894	73.1272	73.954	73.0937	73.1422	74.5355	74.2461	74.2761	73.7835	74.1471	74.4678	75.6802	75.9297	75.8958	72.7854	72.6278	73.1314	73.1678	77.0955	77.4358	77.0513	77.1481	77.1419	77.266	77.1971	77.4687	77.4121	77.4201	77.1912
296	P. marvdashtae SWRI102	70.7726	70.9561	71.15	69.0991	72.6307	74.3395	71.8693	74.0304	74.1968	73.7042	74.0963	73.8522	74.1696	74.0244	74.0047	73.3451	74.1011	74.07	74.0686	73.1538	73.149	73.7986	73.1761	73.2413	74.4078	74.3053	74.2226	73.6872	74.0056	74.4536	75.4931	75.7037	75.6607	72.6405	72.5384	73.0272	73.1063	76.8445	77.2921	76.8432	76.9144	76.9051	77.002	76.9319	77.269	77.224	77.2041	76.8234
297	P. marvdashtae SWRI92	70.709	70.8743	71.033	69.2218	72.5561	74.1577	72.0045	74.2389	74.2396	73.6463	74.0916	73.9654	74.1632	73.9986	74.0656	73.2753	74.1025	73.9921	73.9835	73.2109	73.1733	73.7056	73.1472	73.3395	74.3846	74.2597	74.2275	73.5798	73.9973	74.2917	75.4427	75.6064	75.5445	72.5861	72.4924	73.0274	73.0918	76.8397	77.3013	76.9176	76.9558	76.9187	77.0728	76.9986	77.2843	77.2647	77.2279	76.8351
298	P. bijieensis	71.4623	71.3984	71.0222	70.1608	72.7651	74.6831	72.0925	74.4257	74.5107	73.8262	74.373	74.1441	74.4258	74.1971	74.1815	73.6081	74.2612	74.2672	74.2568	73.2889	73.3107	73.9491	73.4914	73.4042	74.5682	74.4127	74.4439	73.9958	74.3181	74.663	75.5553	75.9046	75.7618	72.93	72.8554	73.2933	73.4855	77.1389	77.5052	77.1349	77.1979	77.0965	77.4172	77.4477	77.7121	77.556	77.6153	77.45
299	P. zanjanensis SWRI12	70.7413	70.8014	71.1848	69.2441	72.6148	74.4556	71.9275	74.2784	74.3184	73.7357	74.2707	74.0775	74.2681	74.2418	74.2374	73.2118	74.2183	74.1724	74.1911	73.2644	73.2178	73.8469	73.2412	73.3441	74.5622	74.3805	74.3344	73.7076	74.1868	74.515	75.7453	76.0247	75.9753	72.8042	72.6872	73.2805	73.3653	77.2825	77.6298	77.1633	77.2572	77.2036	77.5094	77.4198	77.6562	77.6205	77.604	77.4051
300	P. zanjanensis SWRI179	70.6939	70.9236	71.0639	69.205	72.5687	74.3512	71.9096	74.0949	74.2774	73.569	74.0089	73.8319	74.0211	74.0894	74.0137	73.1919	74.0742	74.0846	74.0719	73.0917	73.1483	73.7169	73.0551	73.131	74.5551	74.434	74.2847	73.4881	74.0866	74.3879	75.5943	75.9093	75.86	72.7196	72.6194	73.1678	73.2531	77.1803	77.6103	77.278	77.3861	77.3396	77.464	77.4584	77.7392	77.6773	77.6789	77.4095
301	P. thivervalensis	70.9146	70.8384	71.1868	69.224	72.5039	74.3693	71.8176	74.4046	74.343	73.8659	74.2597	74.1796	74.3884	74.2878	74.3517	73.4449	74.2325	74.2813	74.261	73.3126	73.2754	73.946	73.2426	73.3516	74.6039	74.4089	74.3236	73.7572	74.1303	74.5349	75.7075	76.0149	75.8733	72.8528	72.7359	73.2353	73.3516	77.2709	77.6716	77.2899	77.3833	77.2995	77.5401	77.4606	77.7377	77.7398	77.6851	77.4351
302	P. brassicacearum	71.3544	71.3234	71.1139	70.0983	72.7353	74.6466	72.0402	74.3711	74.6106	73.9975	74.3477	74.2451	74.4893	74.3047	74.3607	73.6747	74.4224	74.4676	74.4254	73.2401	73.4128	74.1441	73.4272	73.4655	74.6438	74.601	74.6724	73.9806	74.3575	74.6988	75.8205	75.9936	75.8267	72.8703	72.842	73.1918	73.3376	77.2917	77.5871	77.2236	77.311	77.1509	77.4305	77.3193	77.7308	77.6781	77.6547	77.3847
303	P. kilonensis	70.8045	71.0687	71.0901	69.1986	72.4906	74.3776	72.0723	74.2799	74.393	73.8169	74.4178	73.9452	74.25	74.0857	74.1422	73.3179	74.1634	74.2346	74.267	73.0858	73.3422	73.9465	73.3982	73.4135	74.7128	74.5376	74.4518	73.7833	74.2514	74.511	75.6511	75.8961	75.8135	72.7067	72.7068	73.1443	73.2451	77.2661	77.6417	77.2047	77.2737	77.2583	77.3629	77.311	77.7311	77.6713	77.6412	77.3851
304	P. zarinae SWRI108	70.5917	70.8068	71.2296	69.1207	72.572	74.3512	71.8264	74.1637	74.2834	73.7264	74.1972	73.9304	74.1489	74.1981	74.1235	73.3683	74.1859	74.1813	74.1876	73.0697	73.2015	73.8309	73.2557	73.2906	74.6839	74.4179	74.2748	73.8293	74.2573	74.527	75.7058	75.9589	75.9424	72.8629	72.7913	73.3144	73.3245	77.2486	77.6486	77.179	77.3042	77.1687	77.4549	77.3712	77.7289	77.6651	77.6317	77.4883
305	P. zarinae F113	71.4151	71.4596	71.116	70.281	72.9173	74.5358	72.1821	74.4819	74.5598	73.9936	74.3573	74.0615	74.2974	74.0668	74.274	73.5604	74.3088	74.4302	74.3677	73.2851	73.4273	73.9801	73.401	73.4131	74.6913	74.3209	74.4578	73.9121	74.2389	74.7175	75.7387	76.0011	75.8751	72.9895	72.7631	73.2895	73.4388	77.2072	77.5414	77.2052	77.3283	77.1868	77.4322	77.2914	77.713	77.5957	77.657	77.4718
306	P. zarinae FR1	71.5212	71.5212	71.1588	70.3896	72.8444	74.6013	72.1332	74.4157	74.4999	74.0159	74.2775	74.0355	74.3049	74.0297	74.2523	73.6241	74.3848	74.4521	74.3787	73.3084	73.3854	74.026	73.4126	73.3707	74.6287	74.346	74.4708	73.9666	74.2751	74.6359	75.7349	75.9281	75.7868	72.9446	72.7484	73.1813	73.4243	77.1375	77.5032	77.1434	77.3325	77.237	77.4162	77.2934	77.6228	77.5482	77.5763	77.41
307	P. vancouverensis	71.7898	71.5272	71.2631	70.594	72.9446	74.4869	72.1946	74.5362	74.5271	73.8607	74.5418	74.3355	74.6778	74.3212	74.4314	73.5749	74.187	74.3573	74.3474	73.5534	73.3895	74.0525	73.5463	73.6249	74.5684	74.4259	74.582	73.9288	74.1525	74.6741	75.6036	75.8887	75.6701	72.8986	72.9263	73.246	73.4689	76.9178	77.3201	76.9672	77.0543	76.9502	77.0755	77.1098	77.299	77.2837	77.4058	76.8654
308	P. laurylsulfatovorans	70.5145	70.8188	71.2309	69.1105	72.4847	74.0427	71.6974	73.9644	74.1251	73.5369	74.0082	73.7928	74.1047	73.9088	73.974	73.1383	73.8484	73.9982	73.9765	73.1247	73.0994	73.6977	73.0501	73.1397	74.2568	73.9942	74.0504	73.6111	73.8157	74.121	75.202	75.4358	75.3182	72.5927	72.5414	73.0245	73.0103	76.8359	77.003	76.7573	76.8507	76.7919	76.9435	76.905	77.0487	77.1196	77.0772	76.6195
309	P. jessenii	72.0296	71.8747	71.1853	71.1141	73.2272	74.5782	72.2787	74.6562	74.6158	74.1319	74.5359	74.3814	74.6908	74.5839	74.6793	73.9015	74.3716	74.5108	74.5011	73.6014	73.5961	74.2327	73.7308	73.6951	74.5602	74.5257	74.672	74.13	74.433	74.7478	75.6291	75.92	75.6446	72.9787	72.9589	73.2558	73.4806	77.0341	77.3466	77.0389	77.1222	76.9805	77.0814	77.1402	77.4348	77.3094	77.4607	77.0563
310	P. azerbaijanoriens SWRI123	70.5882	70.9576	71.3287	68.9854	72.6136	74.2407	71.8714	74.1785	74.2235	73.6343	74.0207	73.8056	74.1687	74.127	74.0402	73.1998	74.0572	74.0328	74.0446	73.1088	73.1265	73.6104	73.1255	73.191	74.4178	74.1569	74.1088	73.6539	73.9998	74.2047	75.4554	75.8028	75.7064	72.641	72.5807	73.1778	73.1596	76.9834	77.3512	76.8791	76.9858	76.9384	77.1093	77.1707	77.3788	77.4185	77.4011	76.8687
311	P. azerbaijanoriens UW4	71.7256	71.8557	71.1662	70.8675	72.9884	74.5995	72.2998	74.4195	74.413	74.1446	74.5228	74.2946	74.5987	74.4281	74.4707	73.8857	74.2468	74.3749	74.3405	73.5472	73.5862	74.2069	73.7615	73.7657	74.6551	74.3883	74.5576	74.0991	74.4314	74.7068	75.6917	75.9394	75.7572	72.8817	72.9856	73.1737	73.4347	77.2229	77.2626	77.0383	77.1384	77.0423	77.2329	77.2272	77.4156	77.3199	77.5216	77.0192
312	P. azerbaijanoriens KGS-2	71.6634	71.6878	71.1423	70.7953	73.0404	74.7152	72.3098	74.451	74.5949	74.0227	74.5175	74.3388	74.6143	74.4653	74.4475	73.9052	74.3132	74.5606	74.5328	73.3598	73.4951	74.2312	73.6649	73.7372	74.6449	74.5002	74.526	74.1281	74.4495	74.7131	75.6859	75.9702	75.7713	72.8818	72.8053	73.1183	73.3183	77.1672	77.4924	77.102	77.2259	77.113	77.3062	77.3838	77.5477	77.5062	77.622	77.196
313	P. azerbaijanoriens KGS-8	71.9225	71.6676	71.2495	71.2058	73.1154	74.6583	72.3936	74.5076	74.7301	74.1978	74.6909	74.4512	74.7122	74.5741	74.6058	73.916	74.4681	74.495	74.4929	73.5191	73.6713	74.2169	73.7108	73.7429	74.743	74.7021	74.7957	74.2783	74.5553	74.809	75.6271	75.9986	75.7383	73.0242	72.8802	73.2457	73.4552	77.1679	77.4957	77.1227	77.239	77.1036	77.2863	77.3137	77.6309	77.5328	77.6456	77.1041
314	P. laurylsulfatiphila	70.7071	70.8214	71.3139	69.1369	72.6462	74.1917	71.7731	74.173	74.1501	73.65	74.078	73.8159	74.2292	74.2378	74.1396	73.1893	73.917	73.9375	73.9719	73.1279	73.1107	73.652	73.1537	73.2075	74.4376	74.1121	74.1765	73.6494	74.1039	74.2637	75.4501	75.6203	75.5376	72.591	72.4695	72.9843	72.9794	76.8876	77.2911	76.8535	76.9139	76.8733	76.9675	77.0318	77.3988	77.4358	77.3818	76.8923
315	P. moorei	72.2825	72.3116	71.3265	71.6878	73.3241	74.7868	72.5887	74.5048	74.7084	74.5047	74.6654	74.5999	74.7827	74.6412	74.6682	74.2637	74.5422	74.5363	74.5025	73.7987	73.7547	74.6645	73.8934	73.9708	74.6332	74.6479	74.7905	74.353	74.6643	74.8879	75.6411	75.7232	75.4645	73.0317	72.9601	73.1182	73.4822	77.112	77.2381	76.9612	77.0868	76.8775	77.0131	77.0666	77.3552	77.1897	77.4508	76.8691
316	P. mohnii	71.7962	71.6765	71.2001	71.0161	72.8067	74.4667	72.2432	74.1186	74.4891	73.9261	74.3249	74.0908	74.3687	74.282	74.2974	73.5123	74.0987	74.1086	74.1339	73.2508	73.3441	73.904	73.3359	73.3224	74.4693	74.2981	74.4714	74.0178	74.1903	74.4984	75.3146	75.5732	75.3296	72.829	72.7449	73.0624	73.3163	76.7536	77.1464	76.8204	76.9121	76.7792	76.8528	76.8498	77.2065	77.0916	77.265	76.8479
317	P. izuensis	70.4857	70.7069	71.1284	69.0417	72.3203	74.0327	71.5637	73.8734	73.8986	73.3593	73.9459	73.728	73.9084	73.997	74.0096	73.0266	73.7837	73.7507	73.7172	73.0525	73.0114	73.4621	73.0267	73.0481	74.1026	73.9619	73.997	73.5358	73.6991	74.0177	75.1172	75.3759	75.3345	72.5703	72.4178	72.9607	72.9947	76.5219	77.0213	76.5987	76.5882	76.5826	76.6565	76.7014	77.0065	77.0096	76.9914	76.5326
318	P. umsongensis	71.8511	71.7085	71.1815	70.5993	72.9586	74.4423	72.3026	74.3705	74.4731	73.992	74.3412	74.1917	74.4881	74.3675	74.505	73.7008	74.146	74.4518	74.4125	73.399	73.496	74.1148	73.5133	73.4764	74.594	74.292	74.5503	74.1099	74.2309	74.7119	75.4952	75.7153	75.548	72.8768	72.9442	73.2298	73.3976	76.8746	77.1763	76.8931	76.9712	76.8008	76.9688	77.0438	77.218	77.1602	77.286	76.8126
319	P. reinekei	70.4554	70.9545	71.3233	69.2476	72.4608	74.057	71.8022	73.9854	74.1049	73.5649	73.9171	73.8108	73.9304	73.995	73.9712	73.0871	73.7975	73.8317	73.8427	73.0094	72.9891	73.6373	73.1034	73.2148	74.0208	73.9292	73.9476	73.4216	73.748	73.994	74.9743	75.2949	75.2252	72.5872	72.5593	73.0276	72.9758	76.4157	76.9448	76.6218	76.6639	76.5973	76.6898	76.6849	76.8904	76.8317	76.8479	76.4415
320	P. azerbaijanoccidens SWRI74	70.4743	71.0456	71.322	69.4256	72.5571	73.986	71.8175	73.8908	74.0993	73.3849	73.727	73.6429	73.8537	73.8002	73.7332	73.0382	73.8224	73.7439	73.7429	72.8332	72.8897	73.5143	73.0949	73.1119	73.898	73.8151	73.7984	73.385	73.8561	73.8788	74.8865	75.2222	75.173	72.5362	72.4629	72.9184	73.0174	76.3089	76.6282	76.354	76.3789	76.3767	76.5086	76.4161	76.5469	76.5369	76.6225	76.2971
321	P. migulae	71.897	71.6906	71.2844	70.9757	72.982	74.4066	72.3162	74.4269	74.6405	74.0729	74.5546	74.1901	74.5655	74.3474	74.3952	73.8465	74.319	74.3781	74.3052	73.2952	73.4452	74.1479	73.6267	73.6745	74.3245	74.4503	74.4105	74.0534	74.1928	74.3884	75.2957	75.4006	75.1674	72.913	72.79	73.0373	73.3234	76.7009	76.9241	76.7538	76.7812	76.6245	76.8621	76.8728	76.9808	76.8762	77.0012	76.7195
322	P. mucoides	70.4888	70.7745	71.3806	68.9598	72.5718	73.869	71.6126	73.8521	74.0548	73.4118	73.8813	73.648	73.9969	73.8397	73.9048	73.1801	73.9022	73.8131	73.7783	72.8672	72.9823	73.4641	72.9505	73.1303	73.9764	73.5821	73.705	73.334	73.5734	73.9141	74.858	75.1147	75.1264	72.4435	72.4773	72.9841	72.9898	76.4283	76.748	76.472	76.5392	76.4903	76.5025	76.4413	76.6471	76.7383	76.7659	76.282
323	P. mandelii	71.8078	71.6218	71.2505	70.7343	72.7965	74.2251	72.1451	74.6539	74.3627	73.9231	74.2027	74.1776	74.7238	74.2259	74.1553	73.6327	74.6073	74.2301	74.1665	73.3073	73.5952	74.0171	73.3305	73.5306	74.1861	73.974	74.3137	73.7463	74.0139	74.3372	75.1403	75.3294	75.1246	72.6934	72.6395	73.0342	73.1909	76.6341	76.828	76.6258	76.5816	76.4788	76.5965	76.522	76.8132	76.8017	76.9326	76.5776
324	P. arsenicoxydans	71.2055	71.31	71.2395	70.2474	72.7158	74.0791	71.7982	73.9689	74.1513	73.6091	74.0276	73.9093	74.0693	73.98	73.9998	73.3189	73.8816	74.064	73.9184	73.0725	73.184	73.7793	73.2238	73.2409	73.9212	73.8056	73.8959	73.6506	73.9143	74.1441	74.8818	75.1424	74.941	72.6141	72.6452	72.906	73.0308	76.5391	76.8896	76.5184	76.6277	76.4944	76.5512	76.5681	76.7623	76.7472	76.8452	76.447
325	P. prosekii	71.53	71.5429	71.2908	70.6553	72.7826	74.1954	72.2292	74.0085	74.4169	73.8597	74.2632	74.1341	74.3554	74.0501	74.107	73.5042	74.0069	74.0943	74.0742	73.1476	73.3214	73.9714	73.4466	73.4261	74.2873	73.9895	74.05	73.6912	73.984	74.2904	75.0545	75.2825	75.037	72.6391	72.5169	72.9004	73.0444	76.8194	76.993	76.6266	76.6716	76.5439	76.7949	76.7933	76.9508	76.802	76.9616	76.4452
326	P. gregormendelii	70.5426	70.7626	71.1735	69.091	72.3505	74.0215	71.6342	73.9216	73.8858	73.618	73.8263	73.8278	74.0448	73.9714	73.8962	73.1262	73.8093	73.8472	73.9847	72.988	73.1173	73.5765	73.168	73.3208	74.2612	74.1299	73.9978	73.568	73.7633	74.0509	75.0381	75.2059	75.1954	72.383	72.5016	73.0066	73.009	76.5981	76.8367	76.6317	76.7464	76.7274	76.6656	76.675	77.0112	76.9911	77.0447	76.5683
327	P. piscium	70.2586	70.7239	71.2846	69.0364	72.4242	73.5652	71.3828	73.6818	73.774	73.0889	73.5338	73.3934	73.7135	73.4268	73.4758	72.9177	73.3763	73.422	73.4619	72.7186	72.7944	73.2618	73.0293	72.8211	73.7594	73.3498	73.5374	73.2366	73.6347	73.6406	74.5422	74.7613	74.759	72.3348	72.2984	72.8101	72.8229	75.9248	76.3101	76.1304	76.1437	76.1414	76.0471	76.1291	76.2077	76.2433	76.266	75.8807
328	P. frederiksbergensis	71.9452	71.6477	71.2972	70.6262	72.9331	74.4401	72.189	74.2744	74.3969	73.8761	74.3703	74.0964	74.3853	74.159	74.1833	73.8447	74.2518	74.2122	74.1992	73.3036	73.5121	74.1163	73.4913	73.6976	74.3643	74.4636	74.3374	73.9788	74.2772	74.4347	75.296	75.5409	75.2242	72.6982	72.6631	72.9761	73.2055	76.6872	77.0426	76.7238	76.8293	76.6498	76.825	76.7901	76.9848	76.912	77.0425	76.6262
329	P. silesiensis	71.7584	71.6634	71.1872	71.1139	72.8442	74.5461	72.4565	74.2172	74.6703	74.1341	74.5329	74.3389	74.5577	74.5068	74.5876	73.8439	74.4909	74.4882	74.4776	73.5096	73.54	74.2445	73.6815	73.7081	74.7889	74.7313	74.6588	74.0863	74.4935	74.7799	75.622	75.7389	75.5548	72.9705	72.9131	73.0943	73.3813	77.117	77.2452	76.8592	77.0674	76.8784	77.0633	77.037	77.2353	77.1534	77.2988	77
330	P. farris SWRI79	70.4477	70.8542	71.1573	69.0902	72.5636	73.9002	71.618	73.7819	73.9286	73.4474	73.9014	73.7127	73.9007	73.7926	73.7848	73.0907	73.6899	73.8396	73.8306	72.8785	72.9148	73.5408	72.9544	73.0934	73.9935	73.9297	73.7664	73.3551	73.7224	73.8682	74.8722	75.0041	74.9625	72.436	72.4159	72.9556	73.0082	76.3903	76.7408	76.3793	76.4847	76.4171	76.6998	76.5704	76.6026	76.5726	76.5858	76.3808
331	P. lini	71.6011	71.8933	71.4359	71.0443	73.136	74.3653	72.3707	74.3921	74.4423	73.9744	74.3247	74.1988	74.4699	74.2569	74.2565	73.7656	74.2275	74.3517	74.2726	73.4013	73.4598	74.1038	73.4984	73.5785	74.3023	74.1794	74.1986	73.879	74.1015	74.3687	75.1295	75.3447	75.1162	72.7644	72.6948	73.009	73.2439	76.5244	76.7728	76.5997	76.6995	76.525	76.7929	76.7675	76.7991	76.6873	76.7922	76.6072
332	P. botevensis COW3	70.3756	70.8108	71.3242	69.0111	72.4873	74.3822	71.9222	74.4382	74.1737	73.7761	74.1471	73.9414	74.2012	74.0265	74.0468	73.247	74.0901	74.1176	74.0608	73.1982	73.1618	73.7816	73.1946	73.297	74.4099	74.303	74.3195	73.6845	74.2118	74.4244	75.2824	75.6732	75.6495	72.5915	72.4852	73.0729	73.0459	77.1527	77.5859	77.1895	77.2138	77.1672	77.453	77.3502	77.5712	77.5601	77.5539	77.0347
333	P. ekonensis COR58	70.7683	70.5333	70.8271	68.8659	72.6073	74.5861	72.0492	74.7518	74.6099	74.169	74.658	74.4128	74.7572	74.6399	74.665	73.297	74.7168	74.5138	74.5565	73.5009	73.4117	74.1835	73.5158	73.5259	75.2291	75.1121	74.9652	74.089	74.6576	74.9233	76.5587	77.0237	76.9557	72.8357	72.7118	73.4121	73.4507	78.5225	79.0362	78.2539	78.4108	78.359	78.5651	78.6863	79.393	79.3151	79.3409	78.5859
334	P. glycinae	71.4384	71.5418	71.2589	70.3174	72.7392	74.4027	72.1715	74.4649	74.6063	74.1413	74.4066	74.3682	74.538	74.4186	74.5178	73.6631	74.4067	74.4491	74.4361	73.4796	73.5433	74.2607	73.5319	73.6594	74.644	74.5758	74.5033	73.9492	74.3236	74.693	75.5733	75.9586	75.7915	72.7388	72.7545	73.2491	73.3422	77.179	77.6187	77.2443	77.2951	77.1954	77.4247	77.4476	77.5991	77.5362	77.5715	77.0203
335	P. bananamidigenes BW11P2	70.452	70.8293	71.1407	68.9849	72.515	74.2326	71.7675	74.2264	74.2033	73.6487	74.0945	73.8771	74.2921	74.1356	74.1339	73.1631	74.099	74.2849	74.2871	73.0603	73.1149	73.7531	73.0789	73.2489	74.4495	74.3612	74.2331	73.667	74.0237	74.2783	75.3868	75.7474	75.6407	72.626	72.5279	72.9767	73.0463	77.0055	77.4896	77.1232	77.1443	77.125	77.181	77.1677	77.368	77.4423	77.4041	76.8552
336	P. kribbensis	71.4414	71.6983	71.2187	70.454	72.81	74.5115	72.1764	74.5408	74.6075	74.0975	74.4182	74.2044	74.6192	74.2482	74.3619	73.6717	74.3435	74.3393	74.3954	73.3381	73.499	74.2083	73.4645	73.5086	74.6305	74.3773	74.6052	73.8998	74.3505	74.6122	75.4371	75.7985	75.5607	72.7487	72.7629	73.0959	73.2867	77.1177	77.6209	77.2012	77.277	77.1606	77.2999	77.3242	77.4703	77.3823	77.5007	77.0421
337	P. koreensis	71.7496	71.6183	71.2767	70.3374	72.8951	74.5547	72.3225	74.5304	74.6588	74.0166	74.4562	74.2913	74.5695	74.3918	74.4423	73.7672	74.3266	74.4251	74.3583	73.3695	73.4985	74.1072	73.5406	73.5822	74.5388	74.4445	74.4171	73.9573	74.2407	74.6687	75.5056	75.9068	75.6744	72.8652	72.9466	73.2867	73.4563	77.2887	77.6281	77.2747	77.3381	77.1983	77.3186	77.3571	77.5872	77.4855	77.5856	77.1564
338	P. monsensis PGSB 8459	70.7419	70.8792	71.4497	69.3021	72.5924	74.0538	71.6793	74.1746	74.1722	73.5951	74.0421	73.8034	74.0765	73.9605	73.9266	73.1775	73.9405	73.9513	73.9957	73.1342	73.1073	73.7612	73.1907	73.2755	74.3149	74.1993	74.116	73.5098	73.8965	74.1849	75.0783	75.3987	75.3732	72.5816	72.5085	73.06	73.0511	76.8659	77.2724	76.838	76.8831	76.8481	77.0142	76.9603	77.2997	77.2837	77.2391	76.7181
339	P. atagosis	70.5801	70.8084	71.3775	69.3204	72.3124	73.8733	71.6723	73.9931	74.1042	73.3357	73.937	73.684	74.0218	73.8093	73.7672	73.0399	73.9244	73.79	73.7762	72.9669	73.1644	73.6032	72.9678	73.116	74.0041	73.9962	73.9061	73.4391	73.7636	74.0609	75.0009	75.2896	75.218	72.5189	72.4788	73.0355	73.0831	76.5193	76.9102	76.5091	76.555	76.5614	76.6674	76.6905	76.7659	76.7669	76.7988	76.3268
340	P. baetica	71.2222	71.7648	71.4946	70.5395	72.9339	74.4144	72.2282	74.3172	74.4459	74.1133	74.2913	74.3658	74.5197	74.2026	74.321	73.5336	74.2004	74.4682	74.4195	73.4314	73.5694	74.1572	73.3944	73.6888	74.397	74.3087	74.2279	73.9357	74.3216	74.5378	75.1612	75.4944	75.2843	72.7389	72.8596	73.4898	73.7558	76.6189	77.0445	76.7035	76.746	76.6357	76.8136	76.757	76.8804	76.8082	76.8091	76.5114
341	P. zeae OE 48.2	71.1779	71.3137	71.7286	69.8579	72.8386	74.1344	72.1154	74.184	74.421	73.6815	74.0331	73.8956	74.1587	73.911	73.9252	73.2908	73.9799	74.0875	74.1151	73.1554	73.1961	73.8879	73.2281	73.3646	74.2027	74.1583	74.0873	73.6255	73.9661	74.2118	74.9789	75.2511	75.1544	72.6043	72.6037	73.1586	73.1626	76.6093	76.9585	76.5692	76.5991	76.5863	76.7167	76.6182	76.7209	76.7679	76.7096	76.3726
342	P. neuropathica	70.6474	71.0285	71.5804	69.1269	72.4891	73.9689	71.817	73.946	74.1345	73.4184	73.8826	73.7464	74.0054	73.8486	73.8309	73.1082	73.767	73.8939	73.8548	72.9538	73.04	73.6022	73.0814	73.1549	74.0556	73.8727	73.763	73.4176	73.8	73.9453	74.8463	75.0837	75.0443	72.4511	72.3592	72.9164	72.8891	76.4451	76.8748	76.4647	76.5533	76.5047	76.6815	76.5475	76.6309	76.6699	76.7291	76.2026
343	P. helmanticensis	70.7729	70.8142	71.292	69.2726	72.3303	73.8781	71.5692	73.7819	74.0341	73.3843	73.7068	73.6429	73.9331	73.6879	73.8211	72.9653	73.6107	73.6272	73.6656	72.9556	72.8527	73.5829	72.9417	73.0346	73.8416	73.6907	73.6944	73.2461	73.6483	73.7887	74.7782	75.0325	74.9649	72.397	72.4124	72.8419	72.869	76.4681	76.796	76.4758	76.5195	76.5021	76.6353	76.5094	76.6409	76.6784	76.6283	76.2954
344	P. tensinigenes ZA 5.3	70.416	70.8341	71.2904	68.9133	72.3412	73.8681	71.4814	73.742	74.1379	73.4062	73.7107	73.6172	73.9185	73.6721	73.7302	72.9105	73.6589	73.7324	73.7699	72.8697	72.8769	73.4915	72.8586	73.0296	73.9725	73.7837	73.862	73.3393	73.7463	73.9338	74.6973	74.938	74.9858	72.4092	72.3485	72.8409	72.8394	76.4165	76.7647	76.4058	76.5109	76.4859	76.6243	76.484	76.5983	76.5566	76.6309	76.1273
345	P. crudilactis	70.3812	70.7619	71.2233	69.2782	72.39	74.0068	71.7723	73.9403	74.0918	73.4011	73.7847	73.6953	74.0506	73.803	73.8361	73.1271	73.8177	73.8424	73.8216	72.9215	72.9946	73.5606	72.9525	72.9927	73.9815	73.9022	73.8166	73.2651	73.5906	73.8101	74.6662	74.9818	74.9397	72.4477	72.4722	72.896	72.8871	76.4187	76.8101	76.4776	76.5209	76.4553	76.4997	76.5239	76.6704	76.6121	76.6523	76.2159
346	P. granadensis	71.9589	71.7064	71.3403	70.4933	72.8318	74.4201	72.3523	74.3816	74.5522	74.1126	74.5156	74.3394	74.7148	74.5195	74.5564	73.7998	74.3416	74.3419	74.3658	73.5616	73.642	74.2234	73.6	73.7027	74.5418	74.3741	74.5533	74.1117	74.3691	74.5682	75.4275	75.6552	75.355	72.8853	72.6336	73.03	73.1727	76.9951	77.4102	76.8579	76.9188	76.7912	77.0574	77.0416	77.1505	77.0882	77.1655	76.8063
347	P. hamedanensis SWRI65	71.1272	71.0919	71.5346	69.6971	72.646	74.24	72.0501	74.2092	74.4085	73.7119	74.1871	73.9378	74.1932	73.9997	74.021	73.3309	74.134	74.153	74.141	73.21	73.2559	73.8114	73.3473	73.2344	74.2762	74.1892	74.085	73.681	74.0478	74.0607	75.1571	75.4615	75.4082	72.7305	72.5917	73.1854	73.1847	76.843	77.3042	76.7247	76.8007	76.7724	76.9297	77.0305	77.106	77.1192	77.1329	76.6499
348	P. hamedanensis SWRI81	70.885	71.1474	71.4988	69.5195	72.7321	74.1691	72.0635	74.1192	74.2049	73.7637	74.1798	73.9601	74.3206	74.1238	74.0986	73.4316	74.1328	74.1818	74.1489	73.2818	73.2579	73.8808	73.4125	73.4145	74.3643	74.2856	74.149	73.6864	74.2096	74.3024	75.1987	75.5111	75.519	72.7132	72.6055	73.139	73.1803	76.7667	77.2742	76.7267	76.7415	76.7087	76.918	76.9723	77.0724	77.0881	77.1481	76.6346
349	P. hamedanensis SWRI99	70.8586	70.9963	71.3608	69.3373	72.6026	74.1139	71.9107	74.1874	74.1539	73.6459	74.048	73.8451	74.0665	73.9383	74.037	73.4044	73.9818	73.8953	73.8347	73.2686	73.1517	73.8329	73.1421	73.1952	74.3109	74.0631	74.1454	73.6009	74.1219	74.1611	75.1285	75.3867	75.2762	72.5772	72.4844	73.0199	73.0301	76.7453	77.2543	76.7154	76.7478	76.727	76.9467	76.9313	77.0706	77.0433	77.0928	76.5196
350	P. hamedanensis SWRI111	70.8036	71.0591	71.5245	69.1053	72.712	74.109	71.9648	74.1697	74.293	73.6409	74.0994	73.8692	74.0593	74.0543	74.1091	73.2204	74.0313	74.0151	73.9601	73.097	73.2329	73.7796	73.2182	73.2567	74.2637	74.0936	74.0318	73.6226	73.9376	74.1419	75.042	75.4003	75.3522	72.5946	72.5478	73.0221	73.0728	76.7636	77.2162	76.5851	76.6641	76.6153	76.8697	76.8435	76.9719	76.9967	77.0191	76.5261
351	P. khorasanensis SWRI153	70.5587	70.8386	71.1704	69.1182	72.5102	74.0615	71.8161	74.084	74.0433	73.6297	74.0603	73.7849	74.1891	74.0411	74.0112	73.2196	74.039	74.0593	74.019	73.0297	73.0482	73.7332	73.0399	73.1543	74.2583	74.0159	73.9622	73.5729	73.9192	74.0735	74.8796	75.216	75.1338	72.5037	72.5133	73.0054	73.017	76.5381	77.003	76.5209	76.5848	76.5304	76.6026	76.6122	76.7508	76.7382	76.7977	76.431
352	P. moraviensis	71.1235	71.4585	71.3401	70.2219	72.698	74.5572	72.2465	74.4955	74.6153	74.0028	74.4068	74.2529	74.496	74.2619	74.339	73.7517	74.3555	74.409	74.3867	73.4234	73.5976	74.1541	73.4528	73.6237	74.6351	74.4847	74.4243	74.0701	74.3564	74.5567	75.4187	75.7175	75.4558	72.745	72.6506	73.1137	73.1752	77.0092	77.4412	77.0255	77.1197	77.0329	77.2635	77.1553	77.3693	77.2559	77.356	76.9156
353	P. triticicola SWRI88	70.5904	70.8606	71.319	69.0912	72.5017	74.1624	71.7703	74.1393	74.4683	73.6388	73.9887	73.8552	74.1172	73.9832	73.9727	73.1473	73.9273	73.9325	73.9802	73.1404	73.0221	73.6825	73.2422	73.3088	74.3431	74.0605	74.1286	73.5788	73.8854	74.1617	75.2088	75.4267	75.3664	72.5361	72.5492	73.02	73.0138	76.9414	77.4003	76.9059	77.001	76.9325	77.1267	77.0981	77.2196	77.2805	77.3272	76.6879
354	P. siliginis SWRI31	70.6335	70.785	71.2361	69.1686	72.434	74.2429	71.9028	74.1349	74.3569	73.6157	73.8906	73.7683	74.0676	73.8604	73.9024	73.2087	73.879	73.9302	74.0033	73.1205	73.0859	73.7892	73.2712	73.2531	74.3098	74.0789	74.1884	73.6282	73.9745	74.2188	75.1636	75.4043	75.3639	72.4912	72.4741	73.0437	73.0978	77.0677	77.4014	76.9228	76.9022	76.8922	77.141	77.0291	77.2403	77.2366	77.1876	76.6421
355	P. siliginis B10	71.414	71.444	71.2787	70.218	72.8423	74.4045	72.2697	74.3934	74.475	73.8528	74.2348	74.0559	74.3918	74.231	74.343	73.5828	74.2209	74.3095	74.2607	73.2255	73.405	74.1313	73.4571	73.545	74.4572	74.2923	74.3108	73.8698	74.2508	74.4514	75.3978	75.6488	75.4409	72.8107	72.7305	73.1973	73.2684	77.0046	77.5801	76.9911	77.0528	76.9672	77.191	77.1573	77.3093	77.2911	77.3349	76.8321
356	P. iranensis SWRI54	70.6562	71.0458	71.2823	69.1239	72.3558	74.1444	71.8113	74.0932	74.2162	73.8299	73.9929	73.8837	74.1663	73.9587	73.9266	73.2096	73.8938	74.0803	74.0457	73.0789	73.1381	73.7192	73.2373	73.3017	74.3057	74.1499	74.0918	73.5951	74.0334	74.2189	75.1953	75.5163	75.3715	72.5075	72.4957	73.0966	73.1303	76.9307	77.4698	76.9628	76.9718	76.9161	77.0718	77.1093	77.2443	77.2174	77.1832	76.6542
357	P. atacamensis	70.4351	70.804	71.3898	69.115	72.3246	74.1321	71.8325	74.0859	74.2648	73.7173	74.1078	73.8269	74.324	74.0501	74.1	73.1847	73.9284	74.1212	74.0624	73.124	73.0575	73.8308	73.1159	73.1825	74.2873	74.0578	74.0805	73.6747	74.0348	74.22	75.2507	75.4809	75.432	72.5162	72.5259	73.093	73.0771	76.883	77.5359	76.9537	76.9701	76.9419	77.1757	77.1105	77.2802	77.3256	77.3295	76.7551
358	P. atacamensis SWRI76	70.5483	70.9633	71.3338	69.0764	72.6226	74.1858	71.8741	74.1621	74.3972	73.6979	74.2193	73.9993	74.269	74.12	74.1561	73.3376	73.9714	74.1632	74.1863	73.2641	73.2689	73.8652	73.2532	73.4429	74.4733	74.2415	74.1811	73.7363	74.1341	74.3639	75.2807	75.5043	75.3797	72.5743	72.5619	73.0972	73.1041	76.9545	77.5061	76.9177	76.9496	76.9111	77.0882	77.1119	77.247	77.2472	77.2852	76.7018
[truncated: 310 more columns]

## Sheet: TableS7
CLP	Peptide lenght	Macrocycle size	Species	Strain	rpoD	Genome	Accession Number NRPSs (NRPS 1; 2; 3)	Accession number of NRPSs genomic region	References
WLIP			P. fakonensis	COW40	QXH51985	CP077076	QXH53928; QXH53929; QXH53930	CP077076	Oni et al., 2019
			P. putida	PC2	CP011789	CP011789	WP_063545021, WP_063544971, WP_063544970	CP011789	Aiman et al., 2018
				NX-1	CP030750	CP030750	WP_112898358, WP_112898324, WP_112898323	CP030750	Omoboye et al., 2019
			P. wayambapalatensis	RW3S1	MT621434	JABWRN000000000	WP_186665015; WP_186664903; WP_189665183	JABWRN010000001	This study
				RW3S2	MT621435	JABWRM000000000	MBC3419664; MBC3419733; MBC3419734	JABWRM010000002	This study
				RW10S2	MT621436	JABWRO000000000	AFJ23819; AFJ23825; AFJ23826	JN982332; JN982333	Rokni-Zadeh et al., 2012
			P. xanthosomae	COR54	QXH47354	CP077075	QXH44673; QXH44672; QXH44671	CP077075	Oni et al., 2019
			Pseudomonas sp.	NSE1	MT506163	-	QDF82239; QDC17526; QDC17525	MK534106; MK650230	Oni et al., 2020
Putisolvin	12	4	P. capeferrum	WCS358	JMIT01000005	JMIT00000000	KEY88310; KEY88311; KEY88312	JMIT01000001	Nguyen et al., 2016
				SWRI59	MT621427	JABWRT000000000	WP_186664617; WP_186701755; WP_189673420	JABWRT010000010	This study
				SWRI68	MT621425	JABWRU000000000	WP_186664617; WP_186664608; WP_189673420	JABWRU010000011	This study
			P. fulva	ATCC 31418 = CIP 106765 = LMG 11722	AB039586	BBIQ00000000	WP_033737094; WP_042139413; WP_042139412	BBIQ01000007	This study
			P. kermanshahensis	SWRI100	MT621423	JABWRY000000000	WP_186702586; WP_186715091; WP_189662545	JABWRY010000004	This study
				SWRI67	MT621422	JABWRX000000000	WP_186702586; WP_186702585; WP_189662545	JABWRX010000003	This study
				SWRI50	MT621424	JABWRW000000000	WP_186676905; WP_186676917; WP_189674439	JABWRW010000002	This study
				E46	CP024086	CP024086	ATP50405; ATP50404; ATP50403	CP024086	This study
				E41	CP024085	CP024085	ATP44926; ATP44927; ATP44928	CP024085	Bernat et al., 2019
			P. parafulva	DSM 17004 = NBRC 16636 = LMG 24038	FN554500	AUEB00000000	WP_042141139; WP_042141141; WP_042141143	BBIU01000002	This study
			P. putida	PCL1445	-	-	ABW17375; ABW17376; ABW17377	DQ151887	Kuiper et al., 2004; Dubern et al., 2008
			P. reidholzensis	CCOS 865	LT009713	UNOZ00000000	WP_119143114; WP_119143116; WP_119143119	UNOZ01000027.1	This study
			P. vlassakiae	RW4S2	MT621428	JABWRP000000000	MBV4543003; MBV4543002; MBV4543001	JABWRP020000014	This study
			Pseudomonas sp.	COR19	MT506152	-	QMN69942; QMN69943; QMN69944	MT511055	Oni et al., 2020
				COR55	MT506156	-	-	-	Oni et al., 2020
				NNC7	MT506155	-	-	-	Oni et al., 2020
				WCU_60	MT506154	-	QMN69951; QMN69952; QMN69953	MT511056	Oni et al., 2020
				WCU_64	MT506153	-	QMN69932; QMN69933; QMN69934	MT511054	Oni et al., 2020
Unknown	13	-	P. tructae	SNU WT1 = KCTC 72265 = JCM 33436	CP035952	CP035952	QBF26727; QBF26728; QBF26729	CP035952	This study
Entolysin	14	4	P. entomophila	L48	CT573326	CT573326	CAK16086; CAK15815; CAK15814	CT573326	Vallet-Gely et al., 2010
				COR5	MT506160	-	-	-	Oni et al., 2020
Xantholysin	14	8	P. maumuensis	COW77	QXH57030	CP077077	QXH58577; QXH58858; QXH58859	CP077077	Oni et al., 2019
			P. mosselii	BW11M1	MT621440	LSLE00000000	WP_062360813; AGM14933; AGM14934	LSLE01000008; KC297506	Li et al., 2013
				BW18S1	MT621441	JABWRK000000000	WP_186599474; WP_186599800; WP_189660247	JABWRK010000003; JABWRK010000007	This study
			P. muyukensis	COW39	QXH35430	CP077073	QXH33350; QXH33344; QXH33345	CP077073	Oni et al., 2019
			P. peradeniyensis	BW13M1	MT621446	JABWRJ000000000	MBV4504140; MBV4504224; MBV4504225	JABWRJ020000001	This study
				BW16M2	MT621445	JABWRI000000000	WP_186714014; WP_186713941; WP_189657035	JABWRI010000013	This study
			P. soli	LMG 27941	HF930597	FOEQ00000000	Fragmented	-	Pascual et al., 2014
			P. xantholysinigenes	RW9S1A	MT621442	JABWRH000000000	WP_186661475; WP_186659393; WP_189664990	JABWRH010000026; JABWRH010000011	This study
			Pseudomonas sp.	250J	JHEE01000009	JHEE00000000	Fragmented	-	Molina-Santiago et al., 2015
				COR51	MT506162	-	-	-	Oni et al., 2020
No CLP BGC	-	-	P. akappagea	PS24 = CECT 9941 = LMG 31497	VXCP00000000	VXCP00000000	-	-	-
			P. alkylphenolica	KL28 = JCM 16553	HE577794	CP009048	-	-	-
			P. alloputida	LMG 29756	OLKK00000000	OLKK00000000	-	-	-
			P. anuradhapurensis sp. nov.	RD8MR3	LC435053	JABWSA000000000	-	-	-
			P. asiatica	RYU5	LC435053	BLJF00000000	-	-	-
			P. baltica	MBT-2 = DSM 111761 = LMG 31955	JACMYH010000008	JACMYH000000000	-	-	-
			P. coleopterorum	CECT 8695 = LMG 28558	KM888187	FNTZ00000000	-	-	-
			P. cremoricolorata	DSM 17059	FN554462	AUEA00000000	-	-	-
			P. defluvii	WCHP16 = GDMCC1.1215 = KCTC 52991	MT074679	MBPN00000000	-	-	-
			P. donghuensis	HYS	AJJP00000000	AJJP00000000	-	-	-
			P. farsensis sp. nov.	SWRI107	MT621411	JABWRF000000000	-	-	-
			Pseudomonas sp.	SWRI51	MT621412	JABWRG000000000	-	-	-
			P. guariconensis	PCAVU11 = LMG 27394	HF674460/LN851842	FMYX00000000	-	-	-
			P. huaxiensis	WCHPs060044 = GDMCC 1.1396 = JCM 32907	QKVL01000021	QKVL00000000	-	-	-
			P. hutmensis	xwS2 = CCTCC AB 2018189 = KACC 19898	QJRG01000040	QJRG00000000	-	-	-
			P. inefficax	DSM 108619	OPYN00000000	OPYN00000000	-	-	-
			P. japonica	JCM 21532	HE577795	FZOL00000000	-	-	-
			P. kurunegalensis sp. nov.	RW1P2	MT621449	JABWSB000000000	-	-	-
			P. monteilii	170620603RE	CP043396	CP043396	-	-	-
			P. monteilii	170918607	CP043395	CP043395	-	-	-
			P. monteilii	STW0522-72	AP022473	AP022473	-	-	-
			P. monteilii	FDAARGOS171	CP014062	CP014062	-	-	-
			P. laurentiana	GSL-010 = JCM 32154	BMQU01000017	BMQU00000000	-	-	-
			P. monteilii	ATCC 700476 = DSM 14164	FN554488	JHYV00000000	-	-	-
			P. mosselii	ATCC BAA-99	FN554491	JHYW00000000	-	-	-
			P. oryzicola sp. nov.	RD9SR1	MT621461	JABWRZ000000000	-	-	-
			P. persica	LMG 29757	OLKL00000000	OLKL00000000	-	-	-
			P. plecoglossicida	DSM 15088 = ATCC 700383 = CIP 106493	FN554503	BBIV00000000	-	-	-
			P. promysalinigenes sp. nov.	RW10S1	MT621430	JABWRQ000000000	-	-	-
			P. putida	NBRC 14164 = ATCC 12633	AB039581	AP013070	-	-	-
			P. pyomelaminifaciens	MR 02	PESJ00000000	PESJ00000000	-	-	-
			P. qingdaonensis	JJ3	PHTD00000000	PHTD00000000	-	-	-
			P. rhizosphaerae	DSM 16299 = LMG 21640	FN554510	CP009533	-	-	-
			P. shirazensis sp. nov.	SWRI56	MT621418	JABWRD000000000	-	-	-
			P. shirazica	LMG 29953	OLKI00000000	OLKI00000000	-	-	-
			P. sichuanensis	WCHPs060039 = TC-11	QKVM00000000	QKVM00000000	-	-	-
			P. taiwanensis	DSM 21245	HE577796	AUEC00000000	-	-	-
			P. urmiensis sp. nov.	SWRI10	MT621419	JABWRE000000000	-	-	-
			P. vranovensis	DSM 16006	HE577793	AUED00000000	-	-	-
			P. wadenswillerensis	CCOS 864	UIDD00000000	UIDD00000000	-	-	-
			P. putida	CSV86	AMWJ02000004	AMWJ00000000	-	-	-
			P. putida	02C-26	CP025262	CP025262	-	-	-
			P. putida	IEC33019	CP016634	CP016634	-	-	-
			P. putida	WP4-W18-CRE-03	AP022055	AP022055	-	-	-
			P. putida	WP8-W18-CRE-01	AP022227	AP022227	-	-	-
			P. putida	GM84	AKJC01000072	AKJC00000000	-	-	-
			P. putida	GIMC5401-PPKH-115	CP060529	CP060529	-	-	-
			P. putida	BR-PH17	CP066306	CP066306	-	-	-
			P. putida	W619	CP000949	CP000949	-	-	-
			P. putida	AA7	CP018846	CP018846	-	-	-
			P. putida	W5	CP026115	CP026115	-	-	-
			P. putida	SY153	CP062218	CP062218	-	-	-
			P. putida	TIJ-51	AEWE02000018	AEWE00000000	-	-	-
			P. putida	GB-1	CP000926	CP000926	-	-	-
			P. putida	PP112420	CP017073	CP017073	-	-	-
			P. putida	S13-1-2	CP010979	CP010979	-	-	-
			P. putida	JQ581	CP050951	CP050951	-	-	-
			P. putida	KF715	AP015029	AP015029	-	-	-
			P. putida	ZXPA-20	CP061723	CP061723	-	-	-
			P. putida	H8234	NC_021491	NC_021491	-	-	-
			P. putida	B1	CP022560	CP022560	-	-	-
			P. putida	R51	CP069317	CP069317	-	-	-
			P. putida	BS3701	CP059052	CP059052	-	-	-
			P. putida	MX-2	CP046872	ALPV00000000	-	-	-
			P. putida	LS46	ALPV02000018	ALPV00000000	-	-	-
			P. putida	15420352	CP045551	CP045551	-	-	-
			P. putida	YC-AE1	CP047311	CP047311	-	-	-
			P. putida	T25-27	CP043576	CP043576	-	-	-
Fragmented BGC	-	-	P. brassicae	MAFF 212427 = ICMP 23635	JAAHBU000000000	JAAHBU000000000	Fragments indicating CLPs	Tandem TE domain : JAAHBU010000073	?
			P. juntendi	DSM 109244 = JCM 33395	LC474103	BLJG00000000	Fragments indicating CLPs	BLJG01000040; BLJG01000168	Putisolvin?
